# Supplementary material for: Guide to the littoral zone vascular flora of Carolina bay lakes (U.S.A.)
Source: Biodivers Data J. 2016 Apr 5;(4):e7964. doi: 10.3897/BDJ.4.e7964 (PMC4911545; doi:10.3897/BDJ.4.e7964)
Supplement: Supplementary material 8 — Climate data supporting Fig 15 (Walter climate diagrams) [file biodiversity_data_journal-4-e7964-s008.xlsx]

## Sheet: Bladen County
	Jan	Feb	Mar	Apr	May	Jun	Jul	Aug	Sep	Oct	Nov	Dec	Ann
Normal Monthly Mean Temp. (°C)	6.05	7.61	12.11	16.11	20.5	24.11	26.38	25.55	22.65	16.88	11.94	7.72	16.44
Normal Monthly Mean PPT (mm)	110.99	84.32	114.8	77.72	89.91	104.14	146.81	156.21	135.89	79.75	68.07	86.86	1254.76
Station	312732 (Elizabethtown 3 Sw)
Station Type	COOP
State	NC
County	Bladen
City	Elizanethtown
Latitude	34.604
Longitude	− 78.648
Elevation	31.39 m
Climate Division	NC06 Southern Coastal Plain
River Basin	Lower Cape Fear
Supported by	NOAA
			Temperature °C

## Sheet: Columbus County
	Jan	Feb	Mar	Apr	May	Jun	Jul	Aug	Sep	Oct	Nov	Dec	Annual
Normal Monthly Mean Temp (°C)	6.94	8.44	12.44	16.72	21.1	25	27.11	26.22	23.38	17.38	12.94	8.38	17.16
Normal Monthly Mean PPT (mm)	110.99	86.61	114.04	74.67	115.31	119.12	143.25	143.51	138.17	75.94	70.86	83.05	1275.08
Station	319357 (Whiteville 7 Nw)
Station Type	COOP
State	NC
County	Columbus
City	Whitevile
Latitude	34.409			Temperature °C
Longitude	− 78.791
Elevation	27.43 m
Climate Division	NC06 Southern Coastal Plain
River Basin	Waccamaw
Supported by	NOAA
