# Supplementary material for: Guide to the littoral zone vascular flora of Carolina bay lakes (U.S.A.)
Source: Biodivers Data J. 2016 Apr 5;(4):e7964. doi: 10.3897/BDJ.4.e7964 (PMC4911545; doi:10.3897/BDJ.4.e7964)
Supplement: Supplementary material 9 — Data supporting Fig 16 (Distribution of plant habit across all Carolina bay lakes) [file biodiversity_data_journal-4-e7964-s009.xlsx]

## Sheet: Sheet1
	Bakers Lake	Bay Tree Lake	Horseshoe Lake	Jones Lake	Lake Waccamaw	Little Singletary Lake	Salters Lake	Singletary Lake
Herb	2	35	37	11	96	23	5	11
Tree/Shrub	14	16	11	19	36	15	15	22
Vine	1	4	3	2	13	1	2	3
