# Supplementary material for: Guide to the littoral zone vascular flora of Carolina bay lakes (U.S.A.)
Source: Biodivers Data J. 2016 Apr 5;(4):e7964. doi: 10.3897/BDJ.4.e7964 (PMC4911545; doi:10.3897/BDJ.4.e7964)
Supplement: Supplementary material 10 — Data supporting Fig 17 (The thirteen most species-rich vascular plant families across all Carolina bay lakes) [file biodiversity_data_journal-4-e7964-s010.xlsx]

## Sheet: Sheet1
	Bakers Lake	Bay Tree Lake	Horseshoe Lake	Jones Lake	Lake Waccamaw	Little Singletary Lake	Salters Lake	Singletary Lake
Xyridaceae	0	1	2	1	2	1	2	2
Smilacaceae	1	2	2	1	3	0	1	1
Rosaceae	0	1	0	0	3	0	1	2
Poaceae	0	7	3	3	17	3	1	2
Orchidaceae	0	0	2	0	3	0	0	0
Melastomataceae	0	1	3	1	1	2	0	1
Lentibulariaceae	0	1	3	0	4	1	0	0
Juncaceae	0	5	4	1	3	4	0	3
Hypericaceae	0	1	2	0	2	1	0	0
Ericaceae	5	2	4	5	3	5	5	7
Cyperaceae	1	5	6	3	14	6	0	0
Asteraceae	0	3	1	0	10	0	0	0
Alismataceae	0	0	1	0	4	0	0	0
