# Supplementary material for: Guide to the littoral zone vascular flora of Carolina bay lakes (U.S.A.)
Source: Biodivers Data J. 2016 Apr 5;(4):e7964. doi: 10.3897/BDJ.4.e7964 (PMC4911545; doi:10.3897/BDJ.4.e7964)
Supplement: Supplementary material 11 — Howell specimen collections [file biodiversity_data_journal-4-e7964-s011.csv]

id	institutionCode	collectionCode	collectionID	basisOfRecord	occurrenceID	catalogNumber	otherCatalogNumbers	kingdom	phylum	class	order	family	scientificName	scientificNameAuthorship	genus	specificEpithet	taxonRank	infraspecificEpithet	identifiedBy	dateIdentified	identificationReferences	identificationRemarks	taxonRemarks	identificationQualifier	typeStatus	recordedBy	recordNumber	eventDate	year	month	day	startDayOfYear	endDayOfYear	verbatimEventDate	occurrenceRemarks	habitat	fieldNumber	informationWithheld	dataGeneralizations	dynamicProperties	associatedTaxa	reproductiveCondition	establishmentMeans	lifeStage	sex	individualCount	samplingProtocol	samplingEffort	preparations
7289109	NCSC		024f44f2-a2f5-4daa-b306-c11efb5aa4d0	PreservedSpecimen	cc3d0ac6-e61e-4525-bd3e-4da2a4affd56	NCSC00088236		Plantae	Magnoliophyta		Haloragales	Haloragaceae	Myriophyllum humile	Morong	Myriophyllum	humile					Weakley, A.S. 2012 (working draft of 30 Nov 2012). Flora of the southern and mid-Atlantic states. Courtesy of the author, University of North Carolina, Chapel Hill.					Howell	WHLA-1	2014-06-22	2014	6	22	173			Frequent at this site; absent in other Carolina bay lakes	Littoral zone
7289110	NCSC		024f44f2-a2f5-4daa-b306-c11efb5aa4d0	PreservedSpecimen	80c3ba8a-b311-4682-a16d-ed2b5d2a59b8	NCSC00088659		Plantae	Magnoliophyta		Liliales	Smilacaceae	Smilax laurifolia	L.	Smilax	laurifolia					Weakley, A.S. 2012 (working draft of 30 Nov 2012). Flora of the southern and mid-Atlantic states. Courtesy of the author, University of North Carolina, Chapel Hill.					Howell	SILA-9	2014-05-08	2014	5	8	128			Frequent at this site; frequent in Carolina bay lakes	Natural Lake Shoreline Swamp (Cypress Subtype; Schafale 2012)
7289111	NCSC		024f44f2-a2f5-4daa-b306-c11efb5aa4d0	PreservedSpecimen	9ffbb9f0-6a21-4175-a6eb-519821ac9c3b	NCSC00088658		Plantae	Magnoliophyta		Sapindales	Sapindaceae	Acer rubrum	Wats.	Acer	rubrum					Weakley, A.S. 2012 (working draft of 30 Nov 2012). Flora of the southern and mid-Atlantic states. Courtesy of the author, University of North Carolina, Chapel Hill.					Howell	SILA-8	2014-05-08	2014	5	8	128			Occasional at this site; occasional in Carolina bay lakes	Natural Lake Shoreline Swamp (Cypress Subtype; Schafale 2012)
7289112	NCSC		024f44f2-a2f5-4daa-b306-c11efb5aa4d0	PreservedSpecimen	d6012284-902f-432d-be2c-f9fbc009713a	NCSC00088672		Plantae	Magnoliophyta		Ericales	Ericaceae	Eubotrys racemosa	(L.) Nutt.	Eubotrys	racemosa					Weakley, A.S. 2012 (working draft of 30 Nov 2012). Flora of the southern and mid-Atlantic states. Courtesy of the author, University of North Carolina, Chapel Hill.					Howell	SILA-7	2014-05-08	2014	5	8	128			Occasional at this site; occasional in Carolina bay lakes	Natural Lake Shoreline Swamp (Cypress Subtype; Schafale 2012)
7289113	NCSC		024f44f2-a2f5-4daa-b306-c11efb5aa4d0	PreservedSpecimen	8053a993-308a-4737-b125-af168f5d889d	NCSC00088664		Plantae	Magnoliophyta		Poales	Bromeliaceae	Tillandsia usneoides	L.	Tillandsia	usneoides					Weakley, A.S. 2012 (working draft of 30 Nov 2012). Flora of the southern and mid-Atlantic states. Courtesy of the author, University of North Carolina, Chapel Hill.					Howell	SILA-6	2014-05-08	2014	5	8	128			Frequent at this site; frequent in Carolina bay lakes	Natural Lake Shoreline Swamp (Cypress Subtype; Schafale 2012)
7289114	NCSC		024f44f2-a2f5-4daa-b306-c11efb5aa4d0	PreservedSpecimen	01423848-c708-4845-afa2-a832f1ec92e7	NCSC00088649		Plantae	Magnoliophyta		Magnoliales	Magnoliaceae	Magnolia virginiana	L.	Magnolia	virginiana					Weakley, A.S. 2012 (working draft of 30 Nov 2012). Flora of the southern and mid-Atlantic states. Courtesy of the author, University of North Carolina, Chapel Hill.					Howell	SILA-5	2014-05-08	2014	5	8	128			Occasional at this site; occasional in Carolina bay lakes	Natural Lake Shoreline Swamp (Cypress Subtype; Schafale 2012)
7289115	NCSC		024f44f2-a2f5-4daa-b306-c11efb5aa4d0	PreservedSpecimen	0a3d3b94-0871-4a1d-8ad1-af0818396636	NCSC00088652		Plantae	Magnoliophyta		Cornales	Nyssaceae	Nyssa biflora	Walter	Nyssa	biflora					Weakley, A.S. 2012 (working draft of 30 Nov 2012). Flora of the southern and mid-Atlantic states. Courtesy of the author, University of North Carolina, Chapel Hill.					Howell	SILA-4	2014-05-08	2014	5	8	128			Occasional at this site; occasional in Carolina bay lakes	Natural Lake Shoreline Swamp (Cypress Subtype; Schafale 2012)
7289116	NCSC		024f44f2-a2f5-4daa-b306-c11efb5aa4d0	PreservedSpecimen	c3721bde-40ae-479c-903f-d7142cca3863	NCSC00088656		Plantae	Magnoliophyta		Poales	Poaceae	Sacciolepis striata	(L.) Nash	Sacciolepis	striata					Weakley, A.S. 2012 (working draft of 30 Nov 2012). Flora of the southern and mid-Atlantic states. Courtesy of the author, University of North Carolina, Chapel Hill.					Howell	SILA-38	2014-07-24	2014	7	24	205			Occasional at this site; occasional in Carolina bay lakes	Natural Lake Shoreline Marsh (Typic Subtype; Schafale 2012)
7289117	NCSC		024f44f2-a2f5-4daa-b306-c11efb5aa4d0	PreservedSpecimen	cfb04656-3627-4a94-81fb-bf67370a1dfc	NCSC00088653		Plantae	Coniferophyta		Pinales	Pinaceae	Pinus serotina	Michx.	Pinus	serotina					Weakley, A.S. 2012 (working draft of 30 Nov 2012). Flora of the southern and mid-Atlantic states. Courtesy of the author, University of North Carolina, Chapel Hill.					Howell	SILA-37	2014-07-24	2014	7	24	205			Rare at this site; rare in Carolina bay lakes	Natural Lake Shoreline Swamp (Cypress Subtype; Schafale 2012)
7289118	NCSC		024f44f2-a2f5-4daa-b306-c11efb5aa4d0	PreservedSpecimen	26b0574b-9e1a-4b31-a0bb-f03ff22e679b	NCSC00088678		Plantae	Magnoliophyta		Gentianales	Gelsemiaceae	Gelsemium sempervirens	Ait.	Gelsemium	sempervirens					Weakley, A.S. 2012 (working draft of 30 Nov 2012). Flora of the southern and mid-Atlantic states. Courtesy of the author, University of North Carolina, Chapel Hill.					Howell	SILA-36	2014-07-24	2014	7	24	205			Occasional at this site; occasional in Carolina bay lakes	Natural Lake Shoreline Swamp (Cypress Subtype; Schafale 2012)
7289119	NCSC		024f44f2-a2f5-4daa-b306-c11efb5aa4d0	PreservedSpecimen	e0dbec87-1c3c-4f2e-a0d7-d23867419e9b	NCSC00088677		Plantae	Magnoliophyta		Fabales	Fabaceae	Wisteria frutescens	(L.) Poir.	Wisteria	frutescens					Weakley, A.S. 2012 (working draft of 30 Nov 2012). Flora of the southern and mid-Atlantic states. Courtesy of the author, University of North Carolina, Chapel Hill.					Howell	SILA-35	2014-07-24	2014	7	24	205			Rare at this site; infrequent in Carolina bay lakes	Natural Lake Shoreline Swamp (Cypress Subtype; Schafale 2012)
7289120	NCSC		024f44f2-a2f5-4daa-b306-c11efb5aa4d0	PreservedSpecimen	19d102fa-f235-4daa-8f46-96a9d27a64d9	NCSC00088676		Plantae	Magnoliophyta		Ericales	Ericaceae	Rhododendron viscosum	Torr.	Rhododendron	viscosum					Weakley, A.S. 2012 (working draft of 30 Nov 2012). Flora of the southern and mid-Atlantic states. Courtesy of the author, University of North Carolina, Chapel Hill.					Howell	SILA-34	2014-07-24	2014	7	24	205			Rare at this site; rare in Carolina bay lakes	Natural Lake Shoreline Swamp (Cypress Subtype; Schafale 2012)
7289121	NCSC		024f44f2-a2f5-4daa-b306-c11efb5aa4d0	PreservedSpecimen	dec352f2-c435-41dc-bd4a-604679a17e77	NCSC00088675		Plantae	Magnoliophyta		Ericales	Ericaceae	Rhododendron viscosum	Torr.	Rhododendron	viscosum					Weakley, A.S. 2012 (working draft of 30 Nov 2012). Flora of the southern and mid-Atlantic states. Courtesy of the author, University of North Carolina, Chapel Hill.					Howell	SILA-33	2014-07-24	2014	7	24	205			Rare at this site; rare in Carolina bay lakes	Natural Lake Shoreline Swamp (Cypress Subtype; Schafale 2012)
7289122	NCSC		024f44f2-a2f5-4daa-b306-c11efb5aa4d0	PreservedSpecimen	90760e03-e2e1-400c-a335-501299c49d6d	NCSC00088683		Plantae	Magnoliophyta		Poales	Juncaceae	Juncus repens	Michx.	Juncus	repens					Weakley, A.S. 2012 (working draft of 30 Nov 2012). Flora of the southern and mid-Atlantic states. Courtesy of the author, University of North Carolina, Chapel Hill.					Howell	SILA-32	2014-07-24	2014	7	24	205			Occasional at this site; occasional in Carolina bay lakes	Natural Lake Shoreline Marsh (Typic Subtype; Schafale 2012)
7289123	NCSC		024f44f2-a2f5-4daa-b306-c11efb5aa4d0	PreservedSpecimen	920301e3-5d86-47d9-a688-967d22f7fcb6	NCSC00088682		Plantae	Magnoliophyta		Poales	Juncaceae	Juncus pelocarpus	E. Mey.	Juncus	pelocarpus					Weakley, A.S. 2012 (working draft of 30 Nov 2012). Flora of the southern and mid-Atlantic states. Courtesy of the author, University of North Carolina, Chapel Hill.					Howell	SILA-31	2014-07-24	2014	7	24	205			Occasional at this site; occasional in Carolina bay lakes	Natural Lake Shoreline Marsh (Typic Subtype; Schafale 2012)
7289124	NCSC		024f44f2-a2f5-4daa-b306-c11efb5aa4d0	PreservedSpecimen	f237ce62-2d34-4dcb-8f6c-13ababe3296f	NCSC00088660		Plantae	Magnoliophyta		Ericales	Theaceae	Gordonia lasianthus	L.	Gordonia	lasianthus					Weakley, A.S. 2012 (working draft of 30 Nov 2012). Flora of the southern and mid-Atlantic states. Courtesy of the author, University of North Carolina, Chapel Hill.					Howell	SILA-30	2014-07-24	2014	7	24	205			Infrequent at this site; occasional in Carolina bay lakes	Natural Lake Shoreline Marsh (Typic Subtype; Schafale 2012)
7289125	NCSC		024f44f2-a2f5-4daa-b306-c11efb5aa4d0	PreservedSpecimen	e81f0f10-6a78-4587-a1b3-2b631d9a1011	NCSC00088671		Plantae	Magnoliophyta		Ericales	Ericaceae	Lyonia lucida	(Lam.) K. Koch	Lyonia	lucida					Weakley, A.S. 2012 (working draft of 30 Nov 2012). Flora of the southern and mid-Atlantic states. Courtesy of the author, University of North Carolina, Chapel Hill.					Howell	SILA-3	2014-05-08	2014	5	8	128			Frequent at this site; abundant in Carolina bay lakes	Natural Lake Shoreline Swamp (Cypress Subtype; Schafale 2012)
7289126	NCSC		024f44f2-a2f5-4daa-b306-c11efb5aa4d0	PreservedSpecimen	11a92dd5-b12d-4ad1-b22e-d9b2905d5a46	NCSC00088662		Plantae	Magnoliophyta		Poales	Xyridaceae	Xyris smalliana	Nash	Xyris	smalliana					Weakley, A.S. 2012 (working draft of 30 Nov 2012). Flora of the southern and mid-Atlantic states. Courtesy of the author, University of North Carolina, Chapel Hill.					Howell			2014						Occasional at this site; occasional in Carolina bay lakes			field values redacted: eventDate, month, day, startDayOfYear, recordNumber, locality, verbatimElevation, decimalLatitude, decimalLongitude, habitat
7289127	NCSC		024f44f2-a2f5-4daa-b306-c11efb5aa4d0	PreservedSpecimen	905239d0-2bbc-4710-89c6-f19a61df564b	NCSC00088665		Plantae	Magnoliophyta		Ericales	Clethraceae	Clethra alnifolia	L.	Clethra	alnifolia					Weakley, A.S. 2012 (working draft of 30 Nov 2012). Flora of the southern and mid-Atlantic states. Courtesy of the author, University of North Carolina, Chapel Hill.					Howell	SILA-28	2014-07-24	2014	7	24	205			Occasional at this site; occasional in Carolina bay lakes	Natural Lake Shoreline Swamp (Cypress Subtype; Schafale 2012)
7289128	NCSC		024f44f2-a2f5-4daa-b306-c11efb5aa4d0	PreservedSpecimen	d3d3dbd4-defe-4144-b537-e677204e2776	NCSC00088686		Plantae	Magnoliophyta		Laurales	Lauraceae	Persea palustris	(Raf.) Sarg.	Persea	palustris					Weakley, A.S. 2012 (working draft of 30 Nov 2012). Flora of the southern and mid-Atlantic states. Courtesy of the author, University of North Carolina, Chapel Hill.					Howell	SILA-27	2014-07-24	2014	7	24	205			Occasional at this site; occasional in Carolina bay lakes	Natural Lake Shoreline Swamp (Cypress Subtype; Schafale 2012)
7289129	NCSC		024f44f2-a2f5-4daa-b306-c11efb5aa4d0	PreservedSpecimen	497e60a3-5b39-4aed-aa57-024d6fa02885	NCSC00088651		Plantae	Magnoliophyta		Myrtales	Melastomataceae	Rhexia nashii	Small	Rhexia	nashii					Weakley, A.S. 2012 (working draft of 30 Nov 2012). Flora of the southern and mid-Atlantic states. Courtesy of the author, University of North Carolina, Chapel Hill.					Howell	SILA-26	2014-07-24	2014	7	24	205			Rare at this site; occasional in Carolina bay lakes	Natural Lake Shoreline Swamp (Cypress Subtype; Schafale 2012)
7289130	NCSC		024f44f2-a2f5-4daa-b306-c11efb5aa4d0	PreservedSpecimen	3126e90e-0b1b-47f6-894e-e852f3b1568a	NCSC00088685		Plantae	Magnoliophyta		Laurales	Lauraceae	Persea palustris	(Raf.) Sarg.	Persea	palustris					Weakley, A.S. 2012 (working draft of 30 Nov 2012). Flora of the southern and mid-Atlantic states. Courtesy of the author, University of North Carolina, Chapel Hill.					Howell	SILA-25	2014-05-29	2014	5	29	149			Occasional at this site; occasional in Carolina bay lakes	Natural Lake Shoreline Swamp (Cypress Subtype; Schafale 2012)
7289131	NCSC		024f44f2-a2f5-4daa-b306-c11efb5aa4d0	PreservedSpecimen	7a5750ee-efb5-42ca-a73c-f91b68e3efd8	NCSC00088657		Plantae	Magnoliophyta		Rosales	Rosaceae	Aronia arbutifolia	(L.) Pers.	Aronia	arbutifolia					Weakley, A.S. 2012 (working draft of 30 Nov 2012). Flora of the southern and mid-Atlantic states. Courtesy of the author, University of North Carolina, Chapel Hill.					Howell	SILA-24	2014-05-29	2014	5	29	149			Rare at this site; rare in Carolina bay lakes	Natural Lake Shoreline Swamp (Cypress Subtype; Schafale 2012)
7289132	NCSC		024f44f2-a2f5-4daa-b306-c11efb5aa4d0	PreservedSpecimen	df9e1c90-1394-4d83-9a04-43469b3579ee	NCSC00088670		Plantae	Magnoliophyta		Ericales	Cyrillaceae	Cyrilla racemiflora	L.	Cyrilla	racemiflora					Weakley, A.S. 2012 (working draft of 30 Nov 2012). Flora of the southern and mid-Atlantic states. Courtesy of the author, University of North Carolina, Chapel Hill.					Howell	SILA-23	2014-05-29	2014	5	29	149			Frequent at this site; frequent in Carolina bay lakes	Natural Lake Shoreline Swamp (Cypress Subtype; Schafale 2012)
7289133	NCSC		024f44f2-a2f5-4daa-b306-c11efb5aa4d0	PreservedSpecimen	7599a263-de7d-47a1-9a9b-c8df1f06f621	NCSC00088681		Plantae	Magnoliophyta		Poales	Juncaceae	Juncus repens	Michx.	Juncus	repens					Weakley, A.S. 2012 (working draft of 30 Nov 2012). Flora of the southern and mid-Atlantic states. Courtesy of the author, University of North Carolina, Chapel Hill.					Howell	SILA-22	2014-05-29	2014	5	29	149			Occasional at this site; occasional in Carolina bay lakes	Natural Lake Shoreline Marsh (Typic Subtype; Schafale 2012)
7289134	NCSC		024f44f2-a2f5-4daa-b306-c11efb5aa4d0	PreservedSpecimen	958e7b69-e6db-415b-9698-c7a1e3bfc5aa	NCSC00088674		Plantae	Magnoliophyta		Ericales	Ericaceae	Vaccinium fuscatum	Aiton	Vaccinium	fuscatum					Weakley, A.S. 2012 (working draft of 30 Nov 2012). Flora of the southern and mid-Atlantic states. Courtesy of the author, University of North Carolina, Chapel Hill.					Howell	SILA-21	2014-05-29	2014	5	29	149			Occasional at this site; occasional in Carolina bay lakes	Natural Lake Shoreline Marsh (Typic Subtype; Schafale 2012)
7289135	NCSC		024f44f2-a2f5-4daa-b306-c11efb5aa4d0	PreservedSpecimen	33f95af2-57ed-4361-8871-dc50165e775c	NCSC00088663		Plantae	Magnoliophyta		Poales	Bromeliaceae	Tillandsia usneoides	L.	Tillandsia	usneoides					Weakley, A.S. 2012 (working draft of 30 Nov 2012). Flora of the southern and mid-Atlantic states. Courtesy of the author, University of North Carolina, Chapel Hill.					Howell	SILA-20	2014-05-29	2014	5	29	149			Frequent at this site; frequent in Carolina bay lakes	Natural Lake Shoreline Marsh (Typic Subtype; Schafale 2012)
7289136	NCSC		024f44f2-a2f5-4daa-b306-c11efb5aa4d0	PreservedSpecimen	a99b5f48-675a-47d5-904f-2c56f8e9794e	NCSC00088679		Plantae	Magnoliophyta		Saxifragales	Iteaceae	Itea virginica	L.	Itea	virginica					Weakley, A.S. 2012 (working draft of 30 Nov 2012). Flora of the southern and mid-Atlantic states. Courtesy of the author, University of North Carolina, Chapel Hill.					Howell	SILA-2	2014-05-08	2014	5	8	128			Occasional at this site; occasional in Carolina bay lakes	Natural Lake Shoreline Swamp (Cypress Subtype; Schafale 2012)
7289137	NCSC		024f44f2-a2f5-4daa-b306-c11efb5aa4d0	PreservedSpecimen	0c95fd2a-9db9-4a41-b133-beb6718a6ee8	NCSC00088650		Plantae	Magnoliophyta		Magnoliales	Magnoliaceae	Magnolia virginiana	L.	Magnolia	virginiana					Weakley, A.S. 2012 (working draft of 30 Nov 2012). Flora of the southern and mid-Atlantic states. Courtesy of the author, University of North Carolina, Chapel Hill.					Howell	SILA-19	2014-05-29	2014	5	29	149			Occasional at this site; occasional in Carolina bay lakes	Natural Lake Shoreline Marsh (Typic Subtype; Schafale 2012)
7289138	NCSC		024f44f2-a2f5-4daa-b306-c11efb5aa4d0	PreservedSpecimen	0321de88-466d-4d7c-9e72-156e507ea9e5	NCSC00088673		Plantae	Magnoliophyta		Ericales	Ericaceae	Vaccinium formosum	Andrews	Vaccinium	formosum					Weakley, A.S. 2012 (working draft of 30 Nov 2012). Flora of the southern and mid-Atlantic states. Courtesy of the author, University of North Carolina, Chapel Hill.					Howell	SILA-18	2014-05-29	2014	5	29	149			Occasional at this site; occasional in Carolina bay lakes	Natural Lake Shoreline Marsh (Typic Subtype; Schafale 2012)
7289139	NCSC		024f44f2-a2f5-4daa-b306-c11efb5aa4d0	PreservedSpecimen	903e6c11-1bc9-4961-872c-7b8a6045e700	NCSC00088655		Plantae	Magnoliophyta		Poales	Poaceae	Panicum hemitomon	Schult.	Panicum	hemitomon					Weakley, A.S. 2012 (working draft of 30 Nov 2012). Flora of the southern and mid-Atlantic states. Courtesy of the author, University of North Carolina, Chapel Hill.					Howell	SILA-17	2014-05-29	2014	5	29	149			Occasional at this site; occasional in Carolina bay lakes	Natural Lake Shoreline Marsh (Typic Subtype; Schafale 2012)
7289140	NCSC		024f44f2-a2f5-4daa-b306-c11efb5aa4d0	PreservedSpecimen	977edbd9-ae08-446e-ae8a-42273590c5e9	NCSC00088661		Plantae	Magnoliophyta		Poales	Xyridaceae	Xyris		Xyris						Weakley, A.S. 2012 (working draft of 30 Nov 2012). Flora of the southern and mid-Atlantic states. Courtesy of the author, University of North Carolina, Chapel Hill.					Howell	SILA-16	2014-05-29	2014	5	29	149			Occasional at this site; occasional in Carolina bay lakes	Natural Lake Shoreline Marsh (Typic Subtype; Schafale 2012)
7289141	NCSC		024f44f2-a2f5-4daa-b306-c11efb5aa4d0	PreservedSpecimen	c9678801-3d33-4f65-8b07-54ee423363bc	NCSC00088666		Plantae	Magnoliophyta		Ericales	Clethraceae	Clethra alnifolia	L.	Clethra	alnifolia					Weakley, A.S. 2012 (working draft of 30 Nov 2012). Flora of the southern and mid-Atlantic states. Courtesy of the author, University of North Carolina, Chapel Hill.					Howell	SILA-15	2014-05-08	2014	5	8	128			Occasional at this site; occasional in Carolina bay lakes	Natural Lake Shoreline Swamp (Cypress Subtype; Schafale 2012)
7289142	NCSC		024f44f2-a2f5-4daa-b306-c11efb5aa4d0	PreservedSpecimen	dd2f6d23-4596-4550-8076-d78abf0cea9f	NCSC00088667		Plantae	Coniferophyta		Pinales	Cupressaceae	Chamaecyparis thyoides	(L.) Britton, Sterns & Poggenb.	Chamaecyparis	thyoides					Weakley, A.S. 2012 (working draft of 30 Nov 2012). Flora of the southern and mid-Atlantic states. Courtesy of the author, University of North Carolina, Chapel Hill.					Howell	SILA-14	2014-05-08	2014	5	8	128			Infrequent at this site; occasional in Carolina bay lakes	Natural Lake Shoreline Swamp (Cypress Subtype; Schafale 2012)
7289143	NCSC		024f44f2-a2f5-4daa-b306-c11efb5aa4d0	PreservedSpecimen	6c74b590-352e-4c49-ab5d-6a180fc0a7af	NCSC00088668		Plantae	Coniferophyta		Pinales	Cupressaceae	Taxodium ascendens	Brongn.	Taxodium	ascendens					Weakley, A.S. 2012 (working draft of 30 Nov 2012). Flora of the southern and mid-Atlantic states. Courtesy of the author, University of North Carolina, Chapel Hill.					Howell	SILA-13	2014-05-08	2014	5	8	128			Abundant at this site; abundant in Carolina bay lakes	Natural Lake Shoreline Swamp (Cypress Subtype; Schafale 2012)
7289144	NCSC		024f44f2-a2f5-4daa-b306-c11efb5aa4d0	PreservedSpecimen	c0529275-9e88-42ed-a4f0-2fdcf134c4e2	NCSC00088654		Plantae	Coniferophyta		Pinales	Pinaceae	Pinus taeda	L.	Pinus	taeda					Weakley, A.S. 2012 (working draft of 30 Nov 2012). Flora of the southern and mid-Atlantic states. Courtesy of the author, University of North Carolina, Chapel Hill.					Howell	SILA-12	2014-05-08	2014	5	8	128			Rare at this site; infrequent in Carolina bay lakes	Natural Lake Shoreline Swamp (Cypress Subtype; Schafale 2012)
7289145	NCSC		024f44f2-a2f5-4daa-b306-c11efb5aa4d0	PreservedSpecimen	4f89524c-f123-4547-ac4b-fce7ee526dcb	NCSC00088669		Plantae	Magnoliophyta		Ericales	Cyrillaceae	Cyrilla racemiflora	L.	Cyrilla	racemiflora					Weakley, A.S. 2012 (working draft of 30 Nov 2012). Flora of the southern and mid-Atlantic states. Courtesy of the author, University of North Carolina, Chapel Hill.					Howell	SILA-11	2014-05-08	2014	5	8	128			Frequent at this site; frequent in Carolina bay lakes	Natural Lake Shoreline Swamp (Cypress Subtype; Schafale 2012)
7289146	NCSC		024f44f2-a2f5-4daa-b306-c11efb5aa4d0	PreservedSpecimen	674e08e2-8c25-4644-a240-0bbd0e69e6dc	NCSC00088684		Plantae	Magnoliophyta		Laurales	Lauraceae	Persea palustris	(Raf.) Sarg.	Persea	palustris					Weakley, A.S. 2012 (working draft of 30 Nov 2012). Flora of the southern and mid-Atlantic states. Courtesy of the author, University of North Carolina, Chapel Hill.					Howell	SILA-10	2014-05-08	2014	5	8	128			Occasional at this site; occasional in Carolina bay lakes	Natural Lake Shoreline Swamp (Cypress Subtype; Schafale 2012)
7289147	NCSC		024f44f2-a2f5-4daa-b306-c11efb5aa4d0	PreservedSpecimen	4f07ca78-c107-4c27-998b-fff33d2c562a	NCSC00088680		Plantae	Magnoliophyta		Poales	Juncaceae	Juncus repens	Michx.	Juncus	repens					Weakley, A.S. 2012 (working draft of 30 Nov 2012). Flora of the southern and mid-Atlantic states. Courtesy of the author, University of North Carolina, Chapel Hill.					Howell	SILA-1	2014-05-08	2014	5	8	128			Occasional at this site; frequent in Carolina bay lakes	Natural Lake Shoreline Swamp (Cypress Subtype; Schafale 2012)
7289148	NCSC		024f44f2-a2f5-4daa-b306-c11efb5aa4d0	PreservedSpecimen	e5903cad-7709-405f-a7c1-89815b8d56fd	NCSC00088478		Plantae	Magnoliophyta		Poales	Bromeliaceae	Tillandsia usneoides	L.	Tillandsia	usneoides					Weakley, A.S. 2012 (working draft of 30 Nov 2012). Flora of the southern and mid-Atlantic states. Courtesy of the author, University of North Carolina, Chapel Hill.					Howell	SALA-9	2014-05-28	2014	5	28	148			Occasional at this site; frequent in Carolina bay lakes	Natural Lake Shoreline Swamp (Cypress Subtype; Schafale 2012)
7289149	NCSC		024f44f2-a2f5-4daa-b306-c11efb5aa4d0	PreservedSpecimen	e32efdd8-46f4-43f3-8d7f-205e0d648b16	NCSC00088479		Plantae	Coniferophyta		Pinales	Cupressaceae	Taxodium ascendens	Brongn.	Taxodium	ascendens					Weakley, A.S. 2012 (working draft of 30 Nov 2012). Flora of the southern and mid-Atlantic states. Courtesy of the author, University of North Carolina, Chapel Hill.					Howell	SALA-8	2014-05-28	2014	5	28	148			Abundant at this site; abundant in Carolina bay lakes	Natural Lake Shoreline Swamp (Cypress Subtype; Schafale 2012)
7289150	NCSC		024f44f2-a2f5-4daa-b306-c11efb5aa4d0	PreservedSpecimen	71b42e96-07c7-422f-bbb2-943ab88ff205	NCSC00088492		Plantae	Magnoliophyta		Santalales	Santalaceae	Phoradendron leucarpum	(Raf.) Reveal & M.C. Johnston	Phoradendron	leucarpum					Weakley, A.S. 2012 (working draft of 30 Nov 2012). Flora of the southern and mid-Atlantic states. Courtesy of the author, University of North Carolina, Chapel Hill.					Howell	SALA-7	2014-03-15	2014	3	15	74			Infrequent at this site; infrequent in Carolina bay lakes	Natural Lake Shoreline Swamp (Cypress Subtype; Schafale 2012)
7289151	NCSC		024f44f2-a2f5-4daa-b306-c11efb5aa4d0	PreservedSpecimen	af13cb10-7159-4a80-ab3d-0302ec734bd2	NCSC00088487		Plantae	Magnoliophyta		Laurales	Lauraceae	Persea palustris	(Raf.) Sarg.	Persea	palustris					Weakley, A.S. 2012 (working draft of 30 Nov 2012). Flora of the southern and mid-Atlantic states. Courtesy of the author, University of North Carolina, Chapel Hill.					Howell	SALA-6	2014-03-15	2014	3	15	74			Occasional at this site; occasional in Carolina bay lakes	Natural Lake Shoreline Swamp (Cypress Subtype; Schafale 2012)
7289152	NCSC		024f44f2-a2f5-4daa-b306-c11efb5aa4d0	PreservedSpecimen	8f5b614e-0e4c-471a-b043-d86578a2f7df	NCSC00088483		Plantae	Magnoliophyta		Ericales	Ericaceae	Lyonia lucida	(Lam.) K. Koch	Lyonia	lucida					Weakley, A.S. 2012 (working draft of 30 Nov 2012). Flora of the southern and mid-Atlantic states. Courtesy of the author, University of North Carolina, Chapel Hill.					Howell	SALA-5	2014-03-15	2014	3	15	74			Frequent at this site; frequent in Carolina bay lakes	Natural Lake Shoreline Swamp (Cypress Subtype; Schafale 2012)
7289153	NCSC		024f44f2-a2f5-4daa-b306-c11efb5aa4d0	PreservedSpecimen	744c9215-897f-4dc8-b251-d25dc2e2a201	NCSC00088497		Plantae	Magnoliophyta		Liliales	Smilacaceae	Smilax laurifolia	L.	Smilax	laurifolia					Weakley, A.S. 2012 (working draft of 30 Nov 2012). Flora of the southern and mid-Atlantic states. Courtesy of the author, University of North Carolina, Chapel Hill.					Howell	SALA-4	2014-03-15	2014	3	15	74			Frequent at this site; frequent in Carolina bay lakes	Natural Lake Shoreline Swamp (Cypress Subtype; Schafale 2012)
7289154	NCSC		024f44f2-a2f5-4daa-b306-c11efb5aa4d0	PreservedSpecimen	6a5cd7d4-2449-4cf8-a05e-43b8245a5eea	NCSC00088489		Plantae	Magnoliophyta		Fagales	Myricaceae	Morella cerifera	Small	Morella	cerifera					Weakley, A.S. 2012 (working draft of 30 Nov 2012). Flora of the southern and mid-Atlantic states. Courtesy of the author, University of North Carolina, Chapel Hill.					Howell	SALA-3	2014-03-15	2014	3	15	74			Infrequent at this site; occasional in Carolina bay lakes	Natural Lake Shoreline Swamp (Cypress Subtype; Schafale 2012)
7289155	NCSC		024f44f2-a2f5-4daa-b306-c11efb5aa4d0	PreservedSpecimen	9803a803-383a-42c8-a938-37e070124a11	NCSC00088498		Plantae	Magnoliophyta		Vitales	Vitaceae	Muscadinia rotundifolia	(Michx.) Small	Muscadinia	rotundifolia					Weakley, A.S. 2012 (working draft of 30 Nov 2012). Flora of the southern and mid-Atlantic states. Courtesy of the author, University of North Carolina, Chapel Hill.					Howell	SALA-21	2014-05-29	2014	5	29	149			Infrequent at this site; occasional in Carolina bay lakes	Natural Lake Shoreline Swamp (Cypress Subtype; Schafale 2012)
7289156	NCSC		024f44f2-a2f5-4daa-b306-c11efb5aa4d0	PreservedSpecimen	c1980667-20e3-4554-9ad1-d926eab612a4	NCSC00088486		Plantae	Magnoliophyta		Laurales	Lauraceae	Persea palustris	(Raf.) Sarg.	Persea	palustris					Weakley, A.S. 2012 (working draft of 30 Nov 2012). Flora of the southern and mid-Atlantic states. Courtesy of the author, University of North Carolina, Chapel Hill.					Howell	SALA-20	2014-05-29	2014	5	29	149			Occasional at this site; occasional in Carolina bay lakes	Natural Lake Shoreline Swamp (Cypress Subtype; Schafale 2012)
7289157	NCSC		024f44f2-a2f5-4daa-b306-c11efb5aa4d0	PreservedSpecimen	e7ed0371-6d4f-4e4e-93ef-678b733e9f31	NCSC00088495		Plantae	Magnoliophyta		Sapindales	Sapindaceae	Acer rubrum	Wats.	Acer	rubrum					Weakley, A.S. 2012 (working draft of 30 Nov 2012). Flora of the southern and mid-Atlantic states. Courtesy of the author, University of North Carolina, Chapel Hill.					Howell	SALA-2	2014-03-15	2014	3	15	74			Occasional at this site; occasional in Carolina bay lakes	Natural Lake Shoreline Swamp (Cypress Subtype; Schafale 2012)
7289158	NCSC		024f44f2-a2f5-4daa-b306-c11efb5aa4d0	PreservedSpecimen	bb9a0109-2885-4f1e-ba70-42d3c47a47da	NCSC00088493		Plantae	Magnoliophyta		Santalales	Santalaceae	Phoradendron leucarpum	(Raf.) Reveal & M.C. Johnston	Phoradendron	leucarpum					Weakley, A.S. 2012 (working draft of 30 Nov 2012). Flora of the southern and mid-Atlantic states. Courtesy of the author, University of North Carolina, Chapel Hill.					Howell	SALA-19	2014-05-29	2014	5	29	149			Infrequent at this site; infrequent in Carolina bay lakes	Natural Lake Shoreline Swamp (Cypress Subtype; Schafale 2012)
7289159	NCSC		024f44f2-a2f5-4daa-b306-c11efb5aa4d0	PreservedSpecimen	3683c992-4811-40cc-bdbd-49d1dc8e4109	NCSC00088494		Plantae	Magnoliophyta		Sapindales	Sapindaceae	Acer rubrum	Wats.	Acer	rubrum					Weakley, A.S. 2012 (working draft of 30 Nov 2012). Flora of the southern and mid-Atlantic states. Courtesy of the author, University of North Carolina, Chapel Hill.					Howell	SALA-18	2014-05-29	2014	5	29	149			Occasional at this site; occasional in Carolina bay lakes	Natural Lake Shoreline Swamp (Cypress Subtype; Schafale 2012)
7289160	NCSC		024f44f2-a2f5-4daa-b306-c11efb5aa4d0	PreservedSpecimen	deaaaa9a-5a8d-4482-af1d-70704cf1ff30	NCSC00088480		Plantae	Magnoliophyta		Ericales	Ericaceae	Lyonia ligustrina	(L.) DC.	Lyonia	ligustrina					Weakley, A.S. 2012 (working draft of 30 Nov 2012). Flora of the southern and mid-Atlantic states. Courtesy of the author, University of North Carolina, Chapel Hill.					Howell	SALA-17	2014-05-29	2014	5	29	149			Infrequent at this site; infrequent in Carolina bay lakes	Natural Lake Shoreline Swamp (Cypress Subtype; Schafale 2012)
7289161	NCSC		024f44f2-a2f5-4daa-b306-c11efb5aa4d0	PreservedSpecimen	f4df1fcc-522f-4454-a962-57fa062c5bc5	NCSC00088484		Plantae	Magnoliophyta		Ericales	Ericaceae	Vaccinium fuscatum	Aiton	Vaccinium	fuscatum					Weakley, A.S. 2012 (working draft of 30 Nov 2012). Flora of the southern and mid-Atlantic states. Courtesy of the author, University of North Carolina, Chapel Hill.					Howell	SALA-16	2014-05-29	2014	5	29	149			Occasional at this site; occasional in Carolina bay lakes	Natural Lake Shoreline Swamp (Cypress Subtype; Schafale 2012)
7289162	NCSC		024f44f2-a2f5-4daa-b306-c11efb5aa4d0	PreservedSpecimen	e3dc23e9-e1af-4f05-8d58-8fb949c11a58	NCSC00088496		Plantae	Magnoliophyta		Liliales	Smilacaceae	Smilax laurifolia	L.	Smilax	laurifolia					Weakley, A.S. 2012 (working draft of 30 Nov 2012). Flora of the southern and mid-Atlantic states. Courtesy of the author, University of North Carolina, Chapel Hill.					Howell	SALA-15	2014-05-28	2014	5	28	148			Frequent at this site; frequent in Carolina bay lakes	Natural Lake Shoreline Swamp (Cypress Subtype; Schafale 2012)
7289163	NCSC		024f44f2-a2f5-4daa-b306-c11efb5aa4d0	PreservedSpecimen	3e5152ac-b255-4d19-88d4-d23ef3b5bd63	NCSC00088491		Plantae	Magnoliophyta		Poales	Poaceae	Panicum hemitomon	Schult.	Panicum	hemitomon					Weakley, A.S. 2012 (working draft of 30 Nov 2012). Flora of the southern and mid-Atlantic states. Courtesy of the author, University of North Carolina, Chapel Hill.					Howell	SALA-14	2014-05-28	2014	5	28	148			Occasional at this site; occasional in Carolina bay lakes	Natural Lake Shoreline Swamp (Cypress Subtype; Schafale 2012)
7289164	NCSC		024f44f2-a2f5-4daa-b306-c11efb5aa4d0	PreservedSpecimen	3332e051-9b27-4437-b3b3-020f2dfc5bc1	NCSC00088488		Plantae	Magnoliophyta		Magnoliales	Magnoliaceae	Magnolia virginiana	L.	Magnolia	virginiana					Weakley, A.S. 2012 (working draft of 30 Nov 2012). Flora of the southern and mid-Atlantic states. Courtesy of the author, University of North Carolina, Chapel Hill.					Howell	SALA-13	2014-05-28	2014	5	28	148			Occasional at this site; occasional in Carolina bay lakes	Natural Lake Shoreline Swamp (Cypress Subtype; Schafale 2012)
7289165	NCSC		024f44f2-a2f5-4daa-b306-c11efb5aa4d0	PreservedSpecimen	5008fe57-92e6-4fd4-b00b-48d216cfd7d3	NCSC00088481		Plantae	Magnoliophyta		Ericales	Ericaceae	Eubotrys racemosa	(L.) Nutt.	Eubotrys	racemosa					Weakley, A.S. 2012 (working draft of 30 Nov 2012). Flora of the southern and mid-Atlantic states. Courtesy of the author, University of North Carolina, Chapel Hill.					Howell	SALA-12	2014-05-28	2014	5	28	148			Occasional at this site; occasional in Carolina bay lakes	Natural Lake Shoreline Swamp (Cypress Subtype; Schafale 2012)
7289166	NCSC		024f44f2-a2f5-4daa-b306-c11efb5aa4d0	PreservedSpecimen	ecc3dbdf-b343-4588-8353-a264c9f048f0	NCSC00088482		Plantae	Magnoliophyta		Ericales	Ericaceae	Lyonia lucida	(Lam.) K. Koch	Lyonia	lucida					Weakley, A.S. 2012 (working draft of 30 Nov 2012). Flora of the southern and mid-Atlantic states. Courtesy of the author, University of North Carolina, Chapel Hill.					Howell	SALA-11	2014-05-28	2014	5	28	148			Frequent at this site; frequent in Carolina bay lakes	Natural Lake Shoreline Swamp (Cypress Subtype; Schafale 2012)
7289167	NCSC		024f44f2-a2f5-4daa-b306-c11efb5aa4d0	PreservedSpecimen	4473c998-e8ff-4ee7-92b0-04a0509eea71	NCSC00088485		Plantae	Magnoliophyta		Ericales	Ericaceae	Vaccinium formosum	Andrews	Vaccinium	formosum					Weakley, A.S. 2012 (working draft of 30 Nov 2012). Flora of the southern and mid-Atlantic states. Courtesy of the author, University of North Carolina, Chapel Hill.					Howell	SALA-10	2014-05-28	2014	5	28	148			Occasional at this site; occasional in Carolina bay lakes	Natural Lake Shoreline Swamp (Cypress Subtype; Schafale 2012)
7289168	NCSC		024f44f2-a2f5-4daa-b306-c11efb5aa4d0	PreservedSpecimen	000844f4-d4cc-449c-8b18-7d846727b6c3	NCSC00088490		Plantae	Pteridophyta	Polypodiopsida	Polypodiales	Polypodiaceae	Pleopeltis polypodiodes	(L.) E.G. Andrews & Windham							Weakley, A.S. 2012 (working draft of 30 Nov 2012). Flora of the southern and mid-Atlantic states. Courtesy of the author, University of North Carolina, Chapel Hill.					Howell	SALA-1	2014-03-15	2014	3	15	74			Infrequent at this site; infrequent in Carolina bay lakes	Natural Lake Shoreline Swamp (Cypress Subtype; Schafale 2012)
7289169	NCSC		024f44f2-a2f5-4daa-b306-c11efb5aa4d0	PreservedSpecimen	fbe6a710-b402-4a98-9e0b-6766781499ab	NCSC00088697		Plantae	Magnoliophyta		Poales	Juncaceae	Juncus	L.	Juncus						Weakley, A.S. 2012 (working draft of 30 Nov 2012). Flora of the southern and mid-Atlantic states. Courtesy of the author, University of North Carolina, Chapel Hill.					Howell	LISI-9	2014-05-05	2014	5	5	125			Occasional at this site; occasional in Carolina bay lakes	Natural Lake Shoreline Swamp (Cypress Subtype; Schafale 2012)
7289170	NCSC		024f44f2-a2f5-4daa-b306-c11efb5aa4d0	PreservedSpecimen	d133cc43-d84c-48b5-b5f4-3f98f176af20	NCSC00088706		Plantae	Coniferophyta		Pinales	Cupressaceae	Chamaecyparis thyoides	(L.) Britton, Sterns & Poggenb.	Chamaecyparis	thyoides					Weakley, A.S. 2012 (working draft of 30 Nov 2012). Flora of the southern and mid-Atlantic states. Courtesy of the author, University of North Carolina, Chapel Hill.					Howell	LISI-8	2014-05-05	2014	5	5	125			Occasional at this site; occasional in Carolina bay lakes	Natural Lake Shoreline Swamp (Cypress Subtype; Schafale 2012)
7289171	NCSC		024f44f2-a2f5-4daa-b306-c11efb5aa4d0	PreservedSpecimen	d3c00677-10bf-4924-8396-e5055575a96c	NCSC00088710		Plantae	Magnoliophyta		Ericales	Ericaceae	Clethra alnifolia	L.	Clethra	alnifolia					Weakley, A.S. 2012 (working draft of 30 Nov 2012). Flora of the southern and mid-Atlantic states. Courtesy of the author, University of North Carolina, Chapel Hill.					Howell	LISI-7	2014-05-05	2014	5	5	125			Occasional at this site; occasional in Carolina bay lakes	Natural Lake Shoreline Swamp (Cypress Subtype; Schafale 2012)
7289172	NCSC		024f44f2-a2f5-4daa-b306-c11efb5aa4d0	PreservedSpecimen	3153ecf5-4952-4581-9885-73f39178e54a	NCSC00088703		Plantae	Pteridophyta	Polypodiopsida	Polypodiales	Blechnaceae	Lorinseria aereolata	(L.) T. Moore							Weakley, A.S. 2012 (working draft of 30 Nov 2012). Flora of the southern and mid-Atlantic states. Courtesy of the author, University of North Carolina, Chapel Hill.					Howell	LISI-6	2014-05-05	2014	5	5	125			Occasional at this site; occasional in Carolina bay lakes	Natural Lake Shoreline Swamp (Cypress Subtype; Schafale 2012)
7289173	NCSC		024f44f2-a2f5-4daa-b306-c11efb5aa4d0	PreservedSpecimen	486e2148-b3cd-4c91-bb4f-560dc56be4ba	NCSC00088693		Plantae	Magnoliophyta		Poales	Juncaceae	Juncus biflorus	Elliot	Juncus	biflorus					Weakley, A.S. 2012 (working draft of 30 Nov 2012). Flora of the southern and mid-Atlantic states. Courtesy of the author, University of North Carolina, Chapel Hill.					Howell	LISI-58	2014-07-30	2014	7	30	211			Rare at this site; rare in Carolina bay lakes	Natural Lake Shoreline Marsh (Typic Subtype; Schafale 2012)
7289174	NCSC		024f44f2-a2f5-4daa-b306-c11efb5aa4d0	PreservedSpecimen	225e3132-3979-4435-92e2-b5e98cf498e1	NCSC00088709		Plantae	Magnoliophyta		Ericales	Clethraceae	Clethra alnifolia	L.	Clethra	alnifolia					Weakley, A.S. 2012 (working draft of 30 Nov 2012). Flora of the southern and mid-Atlantic states. Courtesy of the author, University of North Carolina, Chapel Hill.					Howell	LISI-57	2014-07-30	2014	7	30	211			Occasional at this site; occasional in Carolina bay lakes	Natural Lake Shoreline Swamp (Cypress Subtype; Schafale 2012)
7289175	NCSC		024f44f2-a2f5-4daa-b306-c11efb5aa4d0	PreservedSpecimen	3fd1269c-1cc3-46aa-80e1-f668c4131bf6	NCSC00088719		Plantae	Magnoliophyta		Caryophyllales	Droseraceae	Drosera intermedia	Hayne	Drosera	intermedia					Weakley, A.S. 2012 (working draft of 30 Nov 2012). Flora of the southern and mid-Atlantic states. Courtesy of the author, University of North Carolina, Chapel Hill.					Howell			2014						Occasional at this site; infrequent in Carolina bay lakes			field values redacted: eventDate, month, day, startDayOfYear, recordNumber, locality, verbatimElevation, decimalLatitude, decimalLongitude, habitat
7289176	NCSC		024f44f2-a2f5-4daa-b306-c11efb5aa4d0	PreservedSpecimen	9f2fd412-29e9-443c-b9f6-a886d562d97b	NCSC00088692		Plantae	Magnoliophyta		Poales	Juncaceae	Juncus scirpoides	Lam.	Juncus	scirpoides					Weakley, A.S. 2012 (working draft of 30 Nov 2012). Flora of the southern and mid-Atlantic states. Courtesy of the author, University of North Carolina, Chapel Hill.					Howell	LISI-55	2014-07-30	2014	7	30	211			Occasional at this site; occasional in Carolina bay lakes	Natural Lake Shoreline Swamp (Cypress Subtype; Schafale 2012)
7289177	NCSC		024f44f2-a2f5-4daa-b306-c11efb5aa4d0	PreservedSpecimen	b54c4a71-0761-48ed-9d41-ac78baab59c2	NCSC00088690		Plantae	Magnoliophyta		Malpighiales	Hypericaceae	Hypericum virginicum	L.	Hypericum	virginicum					Weakley, A.S. 2012 (working draft of 30 Nov 2012). Flora of the southern and mid-Atlantic states. Courtesy of the author, University of North Carolina, Chapel Hill.					Howell	LISI-54	2014-07-30	2014	7	30	211			Occasional at this site; occasional in Carolina bay lakes	Natural Lake Shoreline Marsh (Typic Subtype; Schafale 2012)
7289178	NCSC		024f44f2-a2f5-4daa-b306-c11efb5aa4d0	PreservedSpecimen	c8b72435-3dea-41c0-a96f-5df9bd3a6599	NCSC00088715		Plantae	Magnoliophyta		Poales	Cyperaceae	Eleocharis vivipara	Link	Eleocharis	vivipara					Weakley, A.S. 2012 (working draft of 30 Nov 2012). Flora of the southern and mid-Atlantic states. Courtesy of the author, University of North Carolina, Chapel Hill.					Howell			2014						Infrequent at this site; rare in Carolina bay lakes			field values redacted: eventDate, month, day, startDayOfYear, recordNumber, locality, verbatimElevation, decimalLatitude, decimalLongitude, habitat
7289179	NCSC		024f44f2-a2f5-4daa-b306-c11efb5aa4d0	PreservedSpecimen	c69594e6-d5f5-40b2-812b-05a0386de84e	NCSC00088718		Plantae	Magnoliophyta		Caryophyllales	Droseraceae	Drosera intermedia	Hayne	Drosera	intermedia					Weakley, A.S. 2012 (working draft of 30 Nov 2012). Flora of the southern and mid-Atlantic states. Courtesy of the author, University of North Carolina, Chapel Hill.					Howell			2014						Occasional at this site; infrequent in Carolina bay lakes			field values redacted: eventDate, month, day, startDayOfYear, recordNumber, locality, verbatimElevation, decimalLatitude, decimalLongitude, habitat
7289180	NCSC		024f44f2-a2f5-4daa-b306-c11efb5aa4d0	PreservedSpecimen	e0fb83e5-e80f-4980-8b40-27f2c25e0c8c	NCSC00088688		Plantae	Magnoliophyta		Commelinales	Haemodoraceae	Lachnanthes caroliniana	(Lam.) Dandy	Lachnanthes	caroliniana					Weakley, A.S. 2012 (working draft of 30 Nov 2012). Flora of the southern and mid-Atlantic states. Courtesy of the author, University of North Carolina, Chapel Hill.					Howell	LISI-51	2014-07-30	2014	7	30	211			Infrequent at this site; occasional in Carolina bay lakes	Natural Lake Shoreline Marsh (Typic Subtype; Schafale 2012)
7289181	NCSC		024f44f2-a2f5-4daa-b306-c11efb5aa4d0	PreservedSpecimen	11e80ea0-9b65-4cf8-bf10-a5b900dca560	NCSC00088738		Plantae	Magnoliophyta		Poales	Poaceae	Panicum verrucosum	Muhl.	Panicum	verrucosum					Weakley, A.S. 2012 (working draft of 30 Nov 2012). Flora of the southern and mid-Atlantic states. Courtesy of the author, University of North Carolina, Chapel Hill.					Howell	LISI-50	2014-07-30	2014	7	30	211			Occasional at this site; occasional in Carolina bay lakes	Natural Lake Shoreline Marsh (Typic Subtype; Schafale 2012)
7289182	NCSC		024f44f2-a2f5-4daa-b306-c11efb5aa4d0	PreservedSpecimen	fed6826a-e02f-4ad1-9101-42f5e7957ddc	NCSC00088725		Plantae	Magnoliophyta		Ericales	Ericaceae	Lyonia lucida	(Lam.) K. Koch	Lyonia	lucida					Weakley, A.S. 2012 (working draft of 30 Nov 2012). Flora of the southern and mid-Atlantic states. Courtesy of the author, University of North Carolina, Chapel Hill.					Howell	LISI-5	2014-05-05	2014	5	5	125			Occasional at this site; frequent in Carolina bay lakes	Natural Lake Shoreline Swamp (Cypress Subtype; Schafale 2012)
7289183	NCSC		024f44f2-a2f5-4daa-b306-c11efb5aa4d0	PreservedSpecimen	b94f2a21-3500-4af4-a470-30bdfba517c0	NCSC00088700		Plantae	Magnoliophyta		Lamiales	Lentibulariaceae	Utricularia subulata	L.	Utricularia	subulata					Weakley, A.S. 2012 (working draft of 30 Nov 2012). Flora of the southern and mid-Atlantic states. Courtesy of the author, University of North Carolina, Chapel Hill.					Howell	LISI-49	2014-07-30	2014	7	30	211			Occasional at this site; rare in Carolina bay lakes	Natural Lake Shoreline Marsh (Typic Subtype; Schafale 2012)
7289184	NCSC		024f44f2-a2f5-4daa-b306-c11efb5aa4d0	PreservedSpecimen	f2e56c52-4033-4e80-a6cf-cd84ccca50b8	NCSC00088742		Plantae	Magnoliophyta		Ericales	Theaceae	Gordonia lasianthus	L.	Gordonia	lasianthus					Weakley, A.S. 2012 (working draft of 30 Nov 2012). Flora of the southern and mid-Atlantic states. Courtesy of the author, University of North Carolina, Chapel Hill.					Howell	LISI-48	2014-07-30	2014	7	30	211			Infrequent at this site; occasional in Carolina bay lakes	Natural Lake Shoreline Marsh (Typic Subtype; Schafale 2012)
7289185	NCSC		024f44f2-a2f5-4daa-b306-c11efb5aa4d0	PreservedSpecimen	c0a2facf-9dc9-4655-80b7-64d6203eb940	NCSC00088701		Plantae	Magnoliophyta		Myrtales	Melastomataceae	Rhexia virginica	L.	Rhexia	virginica					Weakley, A.S. 2012 (working draft of 30 Nov 2012). Flora of the southern and mid-Atlantic states. Courtesy of the author, University of North Carolina, Chapel Hill.					Howell	LISI-47	2014-07-30	2014	7	30	211			Occasional at this site; rare in Carolina bay lakes	Natural Lake Shoreline Marsh (Typic Subtype; Schafale 2012)
7289186	NCSC		024f44f2-a2f5-4daa-b306-c11efb5aa4d0	PreservedSpecimen	7fce078a-d2b5-4b80-ab8f-b03a46d80210	NCSC00088744		Plantae	Magnoliophyta		Poales	Xyridaceae	Xyris jupicai	Rich.	Xyris	jupicai					Weakley, A.S. 2012 (working draft of 30 Nov 2012). Flora of the southern and mid-Atlantic states. Courtesy of the author, University of North Carolina, Chapel Hill.					Howell	LISI-46	2014-07-30	2014	7	30	211			Occasional at this site; rare in Carolina bay lakes	Natural Lake Shoreline Marsh (Typic Subtype; Schafale 2012)
7289187	NCSC		024f44f2-a2f5-4daa-b306-c11efb5aa4d0	PreservedSpecimen	63a12b7d-1bcb-40f9-b489-332b3938954e	NCSC00088732		Plantae	Magnoliophyta		Myrtales	Melastomataceae	Rhexia nashii	Small	Rhexia	nashii					Weakley, A.S. 2012 (working draft of 30 Nov 2012). Flora of the southern and mid-Atlantic states. Courtesy of the author, University of North Carolina, Chapel Hill.					Howell	LISI-45	2014-07-30	2014	7	30	211			Occasional at this site; occasional in Carolina bay lakes	Natural Lake Shoreline Marsh (Typic Subtype; Schafale 2012)
7289188	NCSC		024f44f2-a2f5-4daa-b306-c11efb5aa4d0	PreservedSpecimen	e8460e9c-585e-48fc-8506-74b43250699a	NCSC00088691		Plantae	Magnoliophyta		Poales	Juncaceae	Juncus repens	Michx.	Juncus	repens					Weakley, A.S. 2012 (working draft of 30 Nov 2012). Flora of the southern and mid-Atlantic states. Courtesy of the author, University of North Carolina, Chapel Hill.					Howell	LISI-44	2014-07-30	2014	7	30	211			Occasional at this site; occasional in Carolina bay lakes	Natural Lake Shoreline Marsh (Typic Subtype; Schafale 2012)
7289189	NCSC		024f44f2-a2f5-4daa-b306-c11efb5aa4d0	PreservedSpecimen	6d4962e3-39e0-48e7-ae59-4fe74d9fe390	NCSC00088716		Plantae	Magnoliophyta		Poales	Cyperaceae	Eleocharis baldwinii	(Torr.) Chapm.	Eleocharis	baldwinii					Weakley, A.S. 2012 (working draft of 30 Nov 2012). Flora of the southern and mid-Atlantic states. Courtesy of the author, University of North Carolina, Chapel Hill.					Howell	LISI-43	2014-07-30	2014	7	30	211			Rare at this site; infrequent in Carolina bay lakes	Natural Lake Shoreline Swamp (Cypress Subtype; Schafale 2012)
7289190	NCSC		024f44f2-a2f5-4daa-b306-c11efb5aa4d0	PreservedSpecimen	a37e645a-7fb4-4ce1-b4c5-0c5774b6fbb3	NCSC00088704		Plantae	Pteridophyta	Polypodiopsida	Polypodiales	Blechnaceae	Anchistea virginica	C.Presl	Anchistea	virginica					Weakley, A.S. 2012 (working draft of 30 Nov 2012). Flora of the southern and mid-Atlantic states. Courtesy of the author, University of North Carolina, Chapel Hill.					Howell	LISI-42	2014-07-30	2014	7	30	211			Occasional at this site; occasional in Carolina bay lakes	Natural Lake Shoreline Swamp (Cypress Subtype; Schafale 2012)
7289191	NCSC		024f44f2-a2f5-4daa-b306-c11efb5aa4d0	PreservedSpecimen	8c9f716d-ddfe-4b17-acca-382f4d1318be	NCSC00088712		Plantae	Magnoliophyta		Poales	Cyperaceae	Dulichium arundinaceum	(L.) Britton	Dulichium	arundinaceum					Weakley, A.S. 2012 (working draft of 30 Nov 2012). Flora of the southern and mid-Atlantic states. Courtesy of the author, University of North Carolina, Chapel Hill.					Howell	LISI-41	2014-05-31	2014	5	31	151			Infrequent at this site; occasional in Carolina bay lakes	Natural Lake Shoreline Swamp (Cypress Subtype; Schafale 2012)
7289192	NCSC		024f44f2-a2f5-4daa-b306-c11efb5aa4d0	PreservedSpecimen	af91d187-15c8-470f-b213-4923730f55d4	NCSC00088729		Plantae	Magnoliophyta		Ericales	Ericaceae	vaccinium fuscatum	Aiton	Vaccinium	fuscatum					Weakley, A.S. 2012 (working draft of 30 Nov 2012). Flora of the southern and mid-Atlantic states. Courtesy of the author, University of North Carolina, Chapel Hill.					Howell	LISI-40	2014-05-31	2014	5	31	151			Occasional at this site; occasional in Carolina bay lakes	Natural Lake Shoreline Swamp (Cypress Subtype; Schafale 2012)
7289193	NCSC		024f44f2-a2f5-4daa-b306-c11efb5aa4d0	PreservedSpecimen	7b8144fb-d11a-4b01-bd76-11c2cca1a303	NCSC00088707		Plantae	Coniferophyta		Pinales	Cupressaceae	Taxodium ascendens	Brongn.	Taxodium	ascendens					Weakley, A.S. 2012 (working draft of 30 Nov 2012). Flora of the southern and mid-Atlantic states. Courtesy of the author, University of North Carolina, Chapel Hill.					Howell	LISI-4	2014-05-05	2014	5	5	125			Abundant at this site; abundantl in Carolina bay lakes	Natural Lake Shoreline Swamp (Cypress Subtype; Schafale 2012)
7289194	NCSC		024f44f2-a2f5-4daa-b306-c11efb5aa4d0	PreservedSpecimen	57576bcd-06a8-41a8-b298-b4868c29d036	NCSC00088728		Plantae	Magnoliophyta		Ericales	Ericaceae	Vaccinium fuscatum	Aiton	Vaccinium	fuscatum					Weakley, A.S. 2012 (working draft of 30 Nov 2012). Flora of the southern and mid-Atlantic states. Courtesy of the author, University of North Carolina, Chapel Hill.					Howell	LISI-39	2014-05-31	2014	5	31	151			Occasional at this site; occasional in Carolina bay lakes	Natural Lake Shoreline Swamp (Cypress Subtype; Schafale 2012)
7289195	NCSC		024f44f2-a2f5-4daa-b306-c11efb5aa4d0	PreservedSpecimen	f2ccdefe-a527-4b58-83e1-7a3c33ed31f6	NCSC00088713		Plantae	Magnoliophyta		Poales	Cyperaceae	Eleocharis equisetoides	(Elliot) Torr.	Eleocharis	equisetoides					Weakley, A.S. 2012 (working draft of 30 Nov 2012). Flora of the southern and mid-Atlantic states. Courtesy of the author, University of North Carolina, Chapel Hill.					Howell			2014						Rare at this site; rare in Carolina bay lakes			field values redacted: eventDate, month, day, startDayOfYear, recordNumber, locality, verbatimElevation, decimalLatitude, decimalLongitude, habitat
7289196	NCSC		024f44f2-a2f5-4daa-b306-c11efb5aa4d0	PreservedSpecimen	d2d0f75f-d6c4-457c-8ecd-ca1763a6b301	NCSC00088736		Plantae	Magnoliophyta		Poales	Poaceae	Agrostis hyemalis	(Walter) Britton, Sterns & Poggenb.	Agrostis	hyemalis					Weakley, A.S. 2012 (working draft of 30 Nov 2012). Flora of the southern and mid-Atlantic states. Courtesy of the author, University of North Carolina, Chapel Hill.					Howell	LISI-37	2014-05-31	2014	5	31	151			Rare at this site; rare in Carolina bay lakes	Natural Lake Shoreline Marsh (Typic Subtype; Schafale 2012)
7289197	NCSC		024f44f2-a2f5-4daa-b306-c11efb5aa4d0	PreservedSpecimen	2f94a462-d40d-4360-bd27-0b12592f39ac	NCSC00088723		Plantae	Magnoliophyta		Ericales	Ericaceae	Lyonia lucida	(Lam.) K. Koch	Lyonia	lucida					Weakley, A.S. 2012 (working draft of 30 Nov 2012). Flora of the southern and mid-Atlantic states. Courtesy of the author, University of North Carolina, Chapel Hill.					Howell	LISI-36	2014-05-31	2014	5	31	151			Occasional at this site; frequent in Carolina bay lakes	Natural Lake Shoreline Marsh (Typic Subtype; Schafale 2012)
7289198	NCSC		024f44f2-a2f5-4daa-b306-c11efb5aa4d0	PreservedSpecimen	8be4bbc8-792f-4246-a842-2a4183cd43a7	NCSC00088737		Plantae	Magnoliophyta		Poales	Poaceae	Panicum hemitomon	Schult.	Panicum	hemitomon					Weakley, A.S. 2012 (working draft of 30 Nov 2012). Flora of the southern and mid-Atlantic states. Courtesy of the author, University of North Carolina, Chapel Hill.					Howell	LISI-35	2014-05-31	2014	5	31	151			Infrequent at this site; occasional in Carolina bay lakes	Natural Lake Shoreline Marsh (Typic Subtype; Schafale 2012)
7289199	NCSC		024f44f2-a2f5-4daa-b306-c11efb5aa4d0	PreservedSpecimen	9b7571c8-bdab-49ac-bc08-b36f7679c97e	NCSC00088687		Plantae	Magnoliophyta		Gentianales	Gelsemiaceae	Gelsemium sempervirens	Ait.	Gelsemium	sempervirens					Weakley, A.S. 2012 (working draft of 30 Nov 2012). Flora of the southern and mid-Atlantic states. Courtesy of the author, University of North Carolina, Chapel Hill.					Howell	LISI-34	2014-05-31	2014	5	31	151			Infrequent at this site; occasional in Carolina bay lakes	Natural Lake Shoreline Marsh (Typic Subtype; Schafale 2012)
7289200	NCSC		024f44f2-a2f5-4daa-b306-c11efb5aa4d0	PreservedSpecimen	5d85881f-0c73-49dc-ab75-0caa952dd1c6	NCSC00088714		Plantae	Magnoliophyta		Poales	Cyperaceae	Rhynchospora distans	(Michx.) Vahl	Rhynchospora	distans					Weakley, A.S. 2012 (working draft of 30 Nov 2012). Flora of the southern and mid-Atlantic states. Courtesy of the author, University of North Carolina, Chapel Hill.					Howell	LISI-33	2014-05-31	2014	5	31	151			Rare at this site; rare in Carolina bay lakes	Natural Lake Shoreline Marsh (Typic Subtype; Schafale 2012)
7289201	NCSC		024f44f2-a2f5-4daa-b306-c11efb5aa4d0	PreservedSpecimen	6a84083b-2938-40fa-8b81-7fc2c9a7bc4a	NCSC00088717		Plantae	Magnoliophyta		Ericales	Cyrillaceae	Cyrilla racemiflora	L.	Cyrilla	racemiflora					Weakley, A.S. 2012 (working draft of 30 Nov 2012). Flora of the southern and mid-Atlantic states. Courtesy of the author, University of North Carolina, Chapel Hill.					Howell	LISI-32	2014-05-31	2014	5	31	151			Frequent at this site; frequent in Carolina bay lakes	Natural Lake Shoreline Marsh (Typic Subtype; Schafale 2012)
7289202	NCSC		024f44f2-a2f5-4daa-b306-c11efb5aa4d0	PreservedSpecimen	94887d3b-ffd4-4d35-a0de-54d9a881b9a5	NCSC00088720		Plantae	Magnoliophyta		Caryophyllales	Droseraceae	Drosera intermedia	Hayne	Drosera	intermedia					Weakley, A.S. 2012 (working draft of 30 Nov 2012). Flora of the southern and mid-Atlantic states. Courtesy of the author, University of North Carolina, Chapel Hill.					Howell			2014						Occasional at this site; infrequent in Carolina bay lakes			field values redacted: eventDate, month, day, startDayOfYear, recordNumber, locality, verbatimElevation, decimalLatitude, decimalLongitude, habitat
7289203	NCSC		024f44f2-a2f5-4daa-b306-c11efb5aa4d0	PreservedSpecimen	c47c49fd-b60c-4fec-999a-8985abf8fde5	NCSC00088741		Plantae	Magnoliophyta		Ericales	Theaceae	Gordonia lasianthus	L.	Gordonia	lasianthus					Weakley, A.S. 2012 (working draft of 30 Nov 2012). Flora of the southern and mid-Atlantic states. Courtesy of the author, University of North Carolina, Chapel Hill.					Howell	LISI-30	2014-05-31	2014	5	31	151			Infrequent at this site; occasional in Carolina bay lakes	Natural Lake Shoreline Marsh (Typic Subtype; Schafale 2012)
7289204	NCSC		024f44f2-a2f5-4daa-b306-c11efb5aa4d0	PreservedSpecimen	e3c4c1b1-2c86-473f-83ba-73d192f6a874	NCSC00088696		Plantae	Magnoliophyta		Poales	Juncaceae	Juncus effusus	L.	Juncus	effusus					Weakley, A.S. 2012 (working draft of 30 Nov 2012). Flora of the southern and mid-Atlantic states. Courtesy of the author, University of North Carolina, Chapel Hill.					Howell	LISI-3	2014-05-05	2014	5	5	125			Occasional at this site; occasional in Carolina bay lakes	Natural Lake Shoreline Swamp (Cypress Subtype; Schafale 2012)
7289205	NCSC		024f44f2-a2f5-4daa-b306-c11efb5aa4d0	PreservedSpecimen	9f5b0868-3474-47d2-aba9-6fbebdc82d87	NCSC00088702		Plantae	Magnoliophyta		Fagales	Betulaceae	Betula nigra	L.	Betula	nigra					Weakley, A.S. 2012 (working draft of 30 Nov 2012). Flora of the southern and mid-Atlantic states. Courtesy of the author, University of North Carolina, Chapel Hill.					Howell	LISI-29	2014-05-31	2014	5	31	151			Infrequent at this site; occasional in Carolina bay lakes	Natural Lake Shoreline Marsh (Typic Subtype; Schafale 2012)
7289206	NCSC		024f44f2-a2f5-4daa-b306-c11efb5aa4d0	PreservedSpecimen	1cd7980c-73b0-4998-8ad4-8708b498d735	NCSC00088699		Plantae	Magnoliophyta		Lamiales	Lentibulariaceae	Utricularia subulata	L.	Utricularia	subulata					Weakley, A.S. 2012 (working draft of 30 Nov 2012). Flora of the southern and mid-Atlantic states. Courtesy of the author, University of North Carolina, Chapel Hill.					Howell	LISI-28	2014-05-31	2014	5	31	151			Occasional at this site; occasional in Carolina bay lakes	Natural Lake Shoreline Marsh (Typic Subtype; Schafale 2012)
7289207	NCSC		024f44f2-a2f5-4daa-b306-c11efb5aa4d0	PreservedSpecimen	3236d95c-b5e5-4fe0-b104-4c3fb60b19dd	NCSC00088735		Plantae	Coniferophyta		Pinales	Pinaceae	Pinus taeda	L.	Pinus	taeda					Weakley, A.S. 2012 (working draft of 30 Nov 2012). Flora of the southern and mid-Atlantic states. Courtesy of the author, University of North Carolina, Chapel Hill.					Howell	LISI-27	2014-05-31	2014	5	31	151			Infrequent at this site; infrequent in Carolina bay lakes	Natural Lake Shoreline Marsh (Typic Subtype; Schafale 2012)
7289208	NCSC		024f44f2-a2f5-4daa-b306-c11efb5aa4d0	PreservedSpecimen	5f97ed66-bf66-476d-b449-6cbd3b24e6f5	NCSC00088708		Plantae	Coniferophyta		Pinales	Cupressaceae	Chamaecyparis thyoides	(L.) Britton, Sterns & Poggenb.	Chamaecyparis	thyoides					Weakley, A.S. 2012 (working draft of 30 Nov 2012). Flora of the southern and mid-Atlantic states. Courtesy of the author, University of North Carolina, Chapel Hill.					Howell	LISI-26	2014-05-31	2014	5	31	151			Occasional at this site; occasional in Carolina bay lakes	Natural Lake Shoreline Marsh (Typic Subtype; Schafale 2012)
7289209	NCSC		024f44f2-a2f5-4daa-b306-c11efb5aa4d0	PreservedSpecimen	64b10ae7-ed68-4983-a67c-9a16b6da5e15	NCSC00088689		Plantae	Magnoliophyta		Commelinales	Haemodoraceae	Lachnanthes caroliniana	(Lam.) Dandy	Lachnanthes	caroliniana					Weakley, A.S. 2012 (working draft of 30 Nov 2012). Flora of the southern and mid-Atlantic states. Courtesy of the author, University of North Carolina, Chapel Hill.					Howell	LISI-25	2014-05-31	2014	5	31	151			Infrequent at this site; occasional in Carolina bay lakes	Natural Lake Shoreline Marsh (Typic Subtype; Schafale 2012)
7289210	NCSC		024f44f2-a2f5-4daa-b306-c11efb5aa4d0	PreservedSpecimen	09a43273-89dc-4195-a67f-ab6cce8013be	NCSC00088722		Plantae	Magnoliophyta		Ericales	Ericaceae	Chamaedaphne calyculata	Moench	Chamaedaphne	calyculata					Weakley, A.S. 2012 (working draft of 30 Nov 2012). Flora of the southern and mid-Atlantic states. Courtesy of the author, University of North Carolina, Chapel Hill.					Howell	LISI-24	2014-05-31	2014	5	31	151			Occasional at this site; occasional in Carolina bay lakes	Natural Lake Shoreline Marsh (Typic Subtype; Schafale 2012)
7289211	NCSC		024f44f2-a2f5-4daa-b306-c11efb5aa4d0	PreservedSpecimen	e4ca708c-faab-4184-b3cd-6a67fb9293a5	NCSC00088721		Plantae	Magnoliophyta		Ericales	Ericaceae	Zenobia pulverulenta	(Bartram ex Willd.) Pollard	Zenobia	pulverulenta					Weakley, A.S. 2012 (working draft of 30 Nov 2012). Flora of the southern and mid-Atlantic states. Courtesy of the author, University of North Carolina, Chapel Hill.					Howell	LISI-23	2014-05-31	2014	5	31	151			Occasional at this site; occasional in Carolina bay lakes	Natural Lake Shoreline Marsh (Typic Subtype; Schafale 2012)
7289212	NCSC		024f44f2-a2f5-4daa-b306-c11efb5aa4d0	PreservedSpecimen	21455903-e60e-4707-9450-53cc035aea8c	NCSC00088743		Plantae	Magnoliophyta		Poales	Xyridaceae	Xyris		Xyris						Weakley, A.S. 2012 (working draft of 30 Nov 2012). Flora of the southern and mid-Atlantic states. Courtesy of the author, University of North Carolina, Chapel Hill.					Howell	LISI-22	2014-05-31	2014	5	31	151			Occasional at this site; occasional in Carolina bay lakes	Natural Lake Shoreline Marsh (Typic Subtype; Schafale 2012)
7289213	NCSC		024f44f2-a2f5-4daa-b306-c11efb5aa4d0	PreservedSpecimen	a924deb3-b61a-41cb-a0a0-43c6cfd12aef	NCSC00088740		Plantae	Magnoliophyta		Sapindales	Sapindaceae	Acer rubrum	Wats.	Acer	rubrum					Weakley, A.S. 2012 (working draft of 30 Nov 2012). Flora of the southern and mid-Atlantic states. Courtesy of the author, University of North Carolina, Chapel Hill.					Howell	LISI-21	2014-05-31	2014	5	31	151			Occasional at this site; occasional in Carolina bay lakes	Natural Lake Shoreline Swamp (Cypress Subtype; Schafale 2012)
7289214	NCSC		024f44f2-a2f5-4daa-b306-c11efb5aa4d0	PreservedSpecimen	b5bb4cf8-830f-47e9-8f31-f4858db127dd	NCSC00088711		Plantae	Coniferophyta		Pinales	Cupressaceae	Taxodium ascendens	Brongn.	Taxodium	ascendens					Weakley, A.S. 2012 (working draft of 30 Nov 2012). Flora of the southern and mid-Atlantic states. Courtesy of the author, University of North Carolina, Chapel Hill.					Howell	LISI-20	2014-05-31	2014	5	31	151			Abundant at this site; abundant in Carolina bay lakes	Natural Lake Shoreline Swamp (Cypress Subtype; Schafale 2012)
7289215	NCSC		024f44f2-a2f5-4daa-b306-c11efb5aa4d0	PreservedSpecimen	5a514ba9-09ea-47ed-9db5-03cc9c7ada9b	NCSC00088695		Plantae	Magnoliophyta		Poales	Juncaceae	Juncus repens	Michx.	Juncus	repens					Weakley, A.S. 2012 (working draft of 30 Nov 2012). Flora of the southern and mid-Atlantic states. Courtesy of the author, University of North Carolina, Chapel Hill.					Howell	LISI-2	2014-05-05	2014	5	5	125			Occasional at this site; occasional in Carolina bay lakes	Natural Lake Shoreline Swamp (Cypress Subtype; Schafale 2012)
7289216	NCSC		024f44f2-a2f5-4daa-b306-c11efb5aa4d0	PreservedSpecimen	7d9ac93b-b103-4a0b-bea6-86fe7f93869b	NCSC00088694		Plantae	Magnoliophyta		Poales	Juncaceae	Juncus repens	Michx.	Juncus	repens					Weakley, A.S. 2012 (working draft of 30 Nov 2012). Flora of the southern and mid-Atlantic states. Courtesy of the author, University of North Carolina, Chapel Hill.					Howell	LISI-19	2014-05-31	2014	5	31	151			Occasional at this site; occasional in Carolina bay lakes	Natural Lake Shoreline Swamp (Cypress Subtype; Schafale 2012)
7289217	NCSC		024f44f2-a2f5-4daa-b306-c11efb5aa4d0	PreservedSpecimen	8f281443-4176-48d8-bf6f-7251a677e921	NCSC00088705		Plantae	Magnoliophyta		Poales	Bromeliaceae	Tillandsia usneoides	L.	Tillandsia	usneoides					Weakley, A.S. 2012 (working draft of 30 Nov 2012). Flora of the southern and mid-Atlantic states. Courtesy of the author, University of North Carolina, Chapel Hill.					Howell	LISI-18	2014-05-31	2014	5	31	151			Occasional at this site; occasional in Carolina bay lakes	Natural Lake Shoreline Swamp (Cypress Subtype; Schafale 2012)
7289218	NCSC		024f44f2-a2f5-4daa-b306-c11efb5aa4d0	PreservedSpecimen	008469ee-4ac1-4851-af1f-4f4b67f6c2b3	NCSC00088733		Plantae	Magnoliophyta		Cornales	Nyssaceae	Nyssa biflora	Walter	Nyssa	biflora					Weakley, A.S. 2012 (working draft of 30 Nov 2012). Flora of the southern and mid-Atlantic states. Courtesy of the author, University of North Carolina, Chapel Hill.					Howell	LISI-17	2014-05-31	2014	5	31	151			Occasional at this site; occasional in Carolina bay lakes	Natural Lake Shoreline Swamp (Cypress Subtype; Schafale 2012)
7289219	NCSC		024f44f2-a2f5-4daa-b306-c11efb5aa4d0	PreservedSpecimen	09c16670-30c6-430f-87ed-641bc398727a	NCSC00088698		Plantae	Magnoliophyta		Laurales	Lauraceae	Persea palustris	(Raf.) Sarg.	Persea	palustris					Weakley, A.S. 2012 (working draft of 30 Nov 2012). Flora of the southern and mid-Atlantic states. Courtesy of the author, University of North Carolina, Chapel Hill.					Howell	LISI-16	2014-05-05	2014	5	5	125			Occasional at this site; occasional in Carolina bay lakes	Natural Lake Shoreline Swamp (Cypress Subtype; Schafale 2012)
7289220	NCSC		024f44f2-a2f5-4daa-b306-c11efb5aa4d0	PreservedSpecimen	05cf6c19-351e-4117-88c1-cffe0a96f5ec	NCSC00088727		Plantae	Magnoliophyta		Ericales	Ericaceae	Chamaedaphne calyculata	Moench	Chamaedaphne	calyculata					Weakley, A.S. 2012 (working draft of 30 Nov 2012). Flora of the southern and mid-Atlantic states. Courtesy of the author, University of North Carolina, Chapel Hill.					Howell	LISI-15	2014-05-05	2014	5	5	125			Occasional at this site; occasional in Carolina bay lakes	Natural Lake Shoreline Swamp (Cypress Subtype; Schafale 2012)
7289221	NCSC		024f44f2-a2f5-4daa-b306-c11efb5aa4d0	PreservedSpecimen	785c09f7-c52e-4216-b49e-e42ab27d92d1	NCSC00088730		Plantae	Magnoliophyta		Ericales	Ericaceae	Vaccinium fuscatum	Aiton	Vaccinium	fuscatum					Weakley, A.S. 2012 (working draft of 30 Nov 2012). Flora of the southern and mid-Atlantic states. Courtesy of the author, University of North Carolina, Chapel Hill.					Howell	LISI-14	2014-05-05	2014	5	5	125			Occasional at this site; occasional in Carolina bay lakes	Natural Lake Shoreline Swamp (Cypress Subtype; Schafale 2012)
7289222	NCSC		024f44f2-a2f5-4daa-b306-c11efb5aa4d0	PreservedSpecimen	a3e76830-71fc-4ce2-9b45-3b6c9c97b9b3	NCSC00088731		Plantae	Magnoliophyta		Myrtales	Melastomataceae	Rhexia		Rhexia						Weakley, A.S. 2012 (working draft of 30 Nov 2012). Flora of the southern and mid-Atlantic states. Courtesy of the author, University of North Carolina, Chapel Hill.					Howell	LISI-13	2014-05-05	2014	5	5	125			Occasional at this site; occasional in Carolina bay lakes	Natural Lake Shoreline Swamp (Cypress Subtype; Schafale 2012)
7289223	NCSC		024f44f2-a2f5-4daa-b306-c11efb5aa4d0	PreservedSpecimen	10ae7ae3-e4c5-49b7-ab3f-20ae50a91036	NCSC00088734		Plantae	Magnoliophyta		Cornales	Nyssaceae	Nyssa biflora	Walter	Nyssa	biflora					Weakley, A.S. 2012 (working draft of 30 Nov 2012). Flora of the southern and mid-Atlantic states. Courtesy of the author, University of North Carolina, Chapel Hill.					Howell	LISI-12	2014-05-05	2014	5	5	125			Occasional at this site; occasional in Carolina bay lakes	Natural Lake Shoreline Swamp (Cypress Subtype; Schafale 2012)
7289224	NCSC		024f44f2-a2f5-4daa-b306-c11efb5aa4d0	PreservedSpecimen	3add695b-2ba1-40a4-a46c-a79e9534d9de	NCSC00088739		Plantae	Magnoliophyta		Sapindales	Sapindaceae	Acer rubrum	Wats.	Acer	rubrum					Weakley, A.S. 2012 (working draft of 30 Nov 2012). Flora of the southern and mid-Atlantic states. Courtesy of the author, University of North Carolina, Chapel Hill.					Howell	LISI-11	2014-05-05	2014	5	5	125			Occasional at this site; occasional in Carolina bay lakes	Natural Lake Shoreline Swamp (Cypress Subtype; Schafale 2012)
7289225	NCSC		024f44f2-a2f5-4daa-b306-c11efb5aa4d0	PreservedSpecimen	f49441f0-3afb-4101-a84c-9d26a219845c	NCSC00088726		Plantae	Magnoliophyta		Ericales	Ericaceae	Zenobia pulverulenta	(Bartram ex Willd.) Pollard	Zenobia	pulverulenta					Weakley, A.S. 2012 (working draft of 30 Nov 2012). Flora of the southern and mid-Atlantic states. Courtesy of the author, University of North Carolina, Chapel Hill.					Howell	LISI-10	2014-05-05	2014	5	5	125			Occasional at this site; occasional in Carolina bay lakes	Natural Lake Shoreline Swamp (Cypress Subtype; Schafale 2012)
7289226	NCSC		024f44f2-a2f5-4daa-b306-c11efb5aa4d0	PreservedSpecimen	475eb099-ada1-411a-8063-5fdaa2d0399f	NCSC00088724		Plantae	Magnoliophyta		Ericales	Ericaceae	Eubotrys racemosa	(L.) Nutt.	Eubotrys	racemosa					Weakley, A.S. 2012 (working draft of 30 Nov 2012). Flora of the southern and mid-Atlantic states. Courtesy of the author, University of North Carolina, Chapel Hill.					Howell	LISI-1	2014-05-05	2014	5	5	125			Occasional at this site; occasional in Carolina bay lakes	Natural Lake Shoreline Swamp (Cypress Subtype; Schafale 2012)
7289227	NCSC		024f44f2-a2f5-4daa-b306-c11efb5aa4d0	PreservedSpecimen	e73c0ef4-0751-4376-9dfd-a443fccfd43c	NCSC00088623		Plantae	Magnoliophyta		Fabales	Fabaceae	Wisteria frutescens	(L.) Poir.	Wisteria	frutescens					Weakley, A.S. 2012 (working draft of 30 Nov 2012). Flora of the southern and mid-Atlantic states. Courtesy of the author, University of North Carolina, Chapel Hill.					Howell	LAWA-99	2014-06-13	2014	6	13	164			Occasional at this site; infrequent in other Carolina bay lakes	Natural Lake Shoreline Swamp (Lake Waccamaw Subtype; Schafale 2012)
7289228	NCSC		024f44f2-a2f5-4daa-b306-c11efb5aa4d0	PreservedSpecimen	1a8623e2-29b0-493d-a0ff-061dce6eed49	NCSC00088476		Plantae	Magnoliophyta		Poales	Cyperaceae	Carex alata	Torr.	Carex	alata					Weakley, A.S. 2012 (working draft of 30 Nov 2012). Flora of the southern and mid-Atlantic states. Courtesy of the author, University of North Carolina, Chapel Hill.					Howell	LAWA-98	2014-06-13	2014	6	13	164			Rare at this site; absent in other Carolina bay lakes	Natural Lake Shoreline Swamp (Lake Waccamaw Subtype; Schafale 2012)
7289229	NCSC		024f44f2-a2f5-4daa-b306-c11efb5aa4d0	PreservedSpecimen	cc998da8-d558-4bc6-b626-678b69aae041	NCSC00088412		Plantae	Magnoliophyta		Rosales	Rosaceae	Rubus pensilvanicus	Poir.	Rubus	pensilvanicus					Weakley, A.S. 2012 (working draft of 30 Nov 2012). Flora of the southern and mid-Atlantic states. Courtesy of the author, University of North Carolina, Chapel Hill.					Howell	LAWA-97	2014-06-13	2014	6	13	164			Infreuquent at this site; absent in other Carolina bay lakes	Natural Lake Shoreline Swamp (Lake Waccamaw Subtype; Schafale 2012)
7289230	NCSC		024f44f2-a2f5-4daa-b306-c11efb5aa4d0	PreservedSpecimen	ec246451-ada3-4004-8475-6817a885b67b	NCSC00088634		Plantae	Magnoliophyta		Fagales	Juglandaceae	Carya glabra	Sweet	Carya	glabra					Weakley, A.S. 2012 (working draft of 30 Nov 2012). Flora of the southern and mid-Atlantic states. Courtesy of the author, University of North Carolina, Chapel Hill.					Howell	LAWA-96	2014-06-13	2014	6	13	164			Rare at this site; absent in other Carolina bay lakes	Natural Lake Shoreline Swamp (Lake Waccamaw Subtype; Schafale 2012)
7289231	NCSC		024f44f2-a2f5-4daa-b306-c11efb5aa4d0	PreservedSpecimen	5356fd87-4010-4326-a841-c0bee790629b	NCSC00088277		Plantae	Magnoliophyta		Rosales	Ulmaceae	Ulmus americana	L.	Ulmus	americana					Weakley, A.S. 2012 (working draft of 30 Nov 2012). Flora of the southern and mid-Atlantic states. Courtesy of the author, University of North Carolina, Chapel Hill.					Howell	LAWA-95	2014-06-13	2014	6	13	164			Rare at this site; absent in other Carolina bay lakes	Natural Lake Shoreline Swamp (Lake Waccamaw Subtype; Schafale 2012)
7289232	NCSC		024f44f2-a2f5-4daa-b306-c11efb5aa4d0	PreservedSpecimen	91608fa2-d779-4c9f-89cc-1346fc388710	NCSC00088279		Plantae	Magnoliophyta		Vitales	Vitaceae	Parthenocissus quinquefolia	(L.) Planch.	Parthenocissus	quinquefolia					Weakley, A.S. 2012 (working draft of 30 Nov 2012). Flora of the southern and mid-Atlantic states. Courtesy of the author, University of North Carolina, Chapel Hill.					Howell	LAWA-94	2014-06-13	2014	6	13	164			Rare at this site; absent in other Carolina bay lakes	Natural Lake Shoreline Swamp (Lake Waccamaw Subtype; Schafale 2012)
7289233	NCSC		024f44f2-a2f5-4daa-b306-c11efb5aa4d0	PreservedSpecimen	ff82ce90-3c94-419a-8573-e10aaf1f6685	NCSC00088456		Plantae	Magnoliophyta		Alismatales	Araceae	Colocasia esculenta	(L.) Schott	Colocasia	esculenta					Weakley, A.S. 2012 (working draft of 30 Nov 2012). Flora of the southern and mid-Atlantic states. Courtesy of the author, University of North Carolina, Chapel Hill.					Howell	LAWA-93	2014-06-13	2014	6	13	164			Infrequent at this site; absent in other Carolina bay lakes	Natural Lake Shoreline Swamp (Lake Waccamaw Subtype; Schafale 2012)
7289234	NCSC		024f44f2-a2f5-4daa-b306-c11efb5aa4d0	PreservedSpecimen	08cc7c29-4667-4437-b699-243e8b1063bc	NCSC00088622		Plantae	Magnoliophyta		Malpighiales	Euphorbiaceae	Triadica sebifera	Small	Triadica	sebifera					Weakley, A.S. 2012 (working draft of 30 Nov 2012). Flora of the southern and mid-Atlantic states. Courtesy of the author, University of North Carolina, Chapel Hill.					Howell	LAWA-92	2014-06-13	2014	6	13	164			Infrequent at this site; absent in other Carolina bay lakes	Natural Lake Shoreline Swamp (Lake Waccamaw Subtype; Schafale 2012)
7289235	NCSC		024f44f2-a2f5-4daa-b306-c11efb5aa4d0	PreservedSpecimen	5549c246-ba39-4153-90e0-dab407ff4270	NCSC00088417		Plantae	Magnoliophyta		Malpighiales	Salicaceae	Populus heterophylla	L.	Populus	heterophylla					Weakley, A.S. 2012 (working draft of 30 Nov 2012). Flora of the southern and mid-Atlantic states. Courtesy of the author, University of North Carolina, Chapel Hill.					Howell	LAWA-91	2014-06-13	2014	6	13	164			Infrequent at this site; absent in other Carolina bay lakes	Natural Lake Shoreline Swamp (Lake Waccamaw Subtype; Schafale 2012)
7289236	NCSC		024f44f2-a2f5-4daa-b306-c11efb5aa4d0	PreservedSpecimen	dcb1acf5-d8e1-4dbb-b281-81e3d1c05c31	NCSC00088242		Plantae	Pteridophyta	Polypodiopsida	Osmundales	Osmundaceae	Osmunda spectabilis	(Willd.)	Osmunda	spectabilis					Weakley, A.S. 2012 (working draft of 30 Nov 2012). Flora of the southern and mid-Atlantic states. Courtesy of the author, University of North Carolina, Chapel Hill.					Howell	LAWA-90	2014-06-13	2014	6	13	164			Infrequent at this site; absent in other Carolina bay lakes	Natural Lake Shoreline Swamp (Lake Waccamaw Subtype; Schafale 2012)
7289237	NCSC		024f44f2-a2f5-4daa-b306-c11efb5aa4d0	PreservedSpecimen	848188db-09cc-48ec-9e75-eb2ae6737af0	NCSC00088454		Plantae	Magnoliophyta		Aquifoliales	Aquifoliaceae	Ilex glabra	(L.) A. Gray	Ilex	glabra					Weakley, A.S. 2012 (working draft of 30 Nov 2012). Flora of the southern and mid-Atlantic states. Courtesy of the author, University of North Carolina, Chapel Hill.					Howell	LAWA-9	2013-09-28	2013	9	28	271			Infrequent at this site; infrequent in other Carolina bay lakes	Natural Lake Shoreline Swamp (Lake Waccamaw Subtype; Schafale 2012)
7289238	NCSC		024f44f2-a2f5-4daa-b306-c11efb5aa4d0	PreservedSpecimen	bd52ac24-7525-4c76-a133-a7f5941fcd5d	NCSC00088405		Plantae	Magnoliophyta		Cornales	Nyssaceae	Nyssa aquatica	L.	Nyssa	aquatica					Weakley, A.S. 2012 (working draft of 30 Nov 2012). Flora of the southern and mid-Atlantic states. Courtesy of the author, University of North Carolina, Chapel Hill.					Howell	LAWA-89	2014-06-13	2014	6	13	164			Infrequent at this site; absent in other Carolina bay lakes	Natural Lake Shoreline Swamp (Lake Waccamaw Subtype; Schafale 2012)
7289239	NCSC		024f44f2-a2f5-4daa-b306-c11efb5aa4d0	PreservedSpecimen	1169d6ae-0798-409a-95c5-26139f87376a	NCSC00088429		Plantae	Magnoliophyta		Asterales	Asteraceae	Baccharis halimifolia	Moench	Baccharis	halimifolia					Weakley, A.S. 2012 (working draft of 30 Nov 2012). Flora of the southern and mid-Atlantic states. Courtesy of the author, University of North Carolina, Chapel Hill.					Howell	LAWA-88	2014-06-13	2014	6	13	164			Infrequent at this site; absent in other Carolina bay lakes	Natural Lake Shoreline Swamp (Lake Waccamaw Subtype; Schafale 2012)
7289240	NCSC		024f44f2-a2f5-4daa-b306-c11efb5aa4d0	PreservedSpecimen	e9c9222f-b281-4ea8-9807-2ab396080aec	NCSC00088244		Plantae	Pteridophyta	Polypodiopsida	Osmundales	Osmundaceae	Osmunda spectabilis	(Willd.)	Osmunda	spectabilis					Weakley, A.S. 2012 (working draft of 30 Nov 2012). Flora of the southern and mid-Atlantic states. Courtesy of the author, University of North Carolina, Chapel Hill.					Howell	LAWA-87	2014-06-13	2014	6	13	164			Infrequent at this site; absent in other Carolina bay lakes	Natural Lake Shoreline Swamp (Lake Waccamaw Subtype; Schafale 2012)
7289241	NCSC		024f44f2-a2f5-4daa-b306-c11efb5aa4d0	PreservedSpecimen	73053e28-be08-4207-adec-921f7b6e82ae	NCSC00088627		Plantae	Magnoliophyta		Cornales	Hydrangeaceae	Decumaria barbara	L.	Decumaria	barbara					Weakley, A.S. 2012 (working draft of 30 Nov 2012). Flora of the southern and mid-Atlantic states. Courtesy of the author, University of North Carolina, Chapel Hill.					Howell	LAWA-86	2014-06-13	2014	6	13	164			Rare at this site; absent in other Carolina bay lakes	Natural Lake Shoreline Swamp (Lake Waccamaw Subtype; Schafale 2012)
7289242	NCSC		024f44f2-a2f5-4daa-b306-c11efb5aa4d0	PreservedSpecimen	c04da1d9-a3ad-499b-b979-3cd05ffbd220	NCSC00088633		Plantae	Magnoliophyta		Saxifragales	Iteaceae	Itea virginica	L.	Itea	virginica					Weakley, A.S. 2012 (working draft of 30 Nov 2012). Flora of the southern and mid-Atlantic states. Courtesy of the author, University of North Carolina, Chapel Hill.					Howell	LAWA-85	2014-06-13	2014	6	13	164			Infrequent at this site; occasional in other Carolina bay lakes	Natural Lake Shoreline Swamp (Lake Waccamaw Subtype; Schafale 2012)
7289243	NCSC		024f44f2-a2f5-4daa-b306-c11efb5aa4d0	PreservedSpecimen	54227de5-60cb-4732-9c42-a1213581c874	NCSC00088439		Plantae	Magnoliophyta		Poales	Bromeliaceae	Tillandsia usneoides usneoides	(L.) L.							Weakley, A.S. 2012 (working draft of 30 Nov 2012). Flora of the southern and mid-Atlantic states. Courtesy of the author, University of North Carolina, Chapel Hill.					Howell	LAWA-84	2014-06-13	2014	6	13	164			Frequent at this site; frequent in other Carolina bay lakes	Natural Lake Shoreline Swamp (Lake Waccamaw Subtype; Schafale 2012)
7289244	NCSC		024f44f2-a2f5-4daa-b306-c11efb5aa4d0	PreservedSpecimen	780d1124-581f-4ad4-a652-e99a458a3e44	NCSC00088400		Plantae	Magnoliophyta		Nymphaeales	Nymphaeaceae	Nuphar sagittifolia	(Walter) Pursh	Nuphar	sagittifolia					Weakley, A.S. 2012 (working draft of 30 Nov 2012). Flora of the southern and mid-Atlantic states. Courtesy of the author, University of North Carolina, Chapel Hill.					Howell			2014						Occasional along S and SW shorelines at this site; absent in other Carolina bay lakes			field values redacted: eventDate, month, day, startDayOfYear, recordNumber, locality, verbatimElevation, decimalLatitude, decimalLongitude, habitat
7289245	NCSC		024f44f2-a2f5-4daa-b306-c11efb5aa4d0	PreservedSpecimen	047d8f3e-91f2-4489-8635-76ce00ac5685	NCSC00088448		Plantae	Magnoliophyta		Sapindales	Anacardiaceae	Toxicodendron radicans	(L.) Kuntze	Toxicodendron	radicans					Weakley, A.S. 2012 (working draft of 30 Nov 2012). Flora of the southern and mid-Atlantic states. Courtesy of the author, University of North Carolina, Chapel Hill.					Howell	LAWA-82	2014-06-13	2014	6	13	164			Occasional at this site; infrequent in other Carolina bay lakes	Natural Lake Shoreline Swamp (Lake Waccamaw Subtype; Schafale 2012)
7289246	NCSC		024f44f2-a2f5-4daa-b306-c11efb5aa4d0	PreservedSpecimen	54444cf6-124f-4323-a943-7b5486d5314a	NCSC00088436		Plantae	Magnoliophyta		Lamiales	Bignoniaceae	Campsis radicans	(L.) Seem. ex Bureau	Campsis	radicans					Weakley, A.S. 2012 (working draft of 30 Nov 2012). Flora of the southern and mid-Atlantic states. Courtesy of the author, University of North Carolina, Chapel Hill.					Howell	LAWA-81	2014-06-13	2014	6	13	164			Rare at this site; absent in other Carolina bay lakes	Natural Lake Shoreline Swamp (Lake Waccamaw Subtype; Schafale 2012)
7289247	NCSC		024f44f2-a2f5-4daa-b306-c11efb5aa4d0	PreservedSpecimen	7150ff82-b98b-4dff-8162-6dd6525cc345	NCSC00088618		Plantae	Magnoliophyta		Ericales	Ebenaceae	Diospyros virginiana	L.	Diospyros	virginiana					Weakley, A.S. 2012 (working draft of 30 Nov 2012). Flora of the southern and mid-Atlantic states. Courtesy of the author, University of North Carolina, Chapel Hill.					Howell	LAWA-80	2014-06-13	2014	6	13	164			Rare at this site; absent in other Carolina bay lakes	Natural Lake Shoreline Swamp (Lake Waccamaw Subtype; Schafale 2012)
7289248	NCSC		024f44f2-a2f5-4daa-b306-c11efb5aa4d0	PreservedSpecimen	524a9239-1473-466c-8daf-71c2627ebc97	NCSC00088396		Plantae	Magnoliophyta		Fagales	Myricaceae	Morella cerifera	Small	Morella	cerifera					Weakley, A.S. 2012 (working draft of 30 Nov 2012). Flora of the southern and mid-Atlantic states. Courtesy of the author, University of North Carolina, Chapel Hill.					Howell	LAWA-8	2013-09-28	2013	9	28	271			Occasional at this site; occasional in other Carolina bay lakes	Natural Lake Shoreline Swamp (Lake Waccamaw Subtype; Schafale 2012)
7289249	NCSC		024f44f2-a2f5-4daa-b306-c11efb5aa4d0	PreservedSpecimen	f3701f2d-7ec8-4636-8949-3d1b42a44e71	NCSC00088248		Plantae	Magnoliophyta		Poales	Poaceae	Panicum hemitomon	Schult.	Panicum	hemitomon					Weakley, A.S. 2012 (working draft of 30 Nov 2012). Flora of the southern and mid-Atlantic states. Courtesy of the author, University of North Carolina, Chapel Hill.					Howell	LAWA-79	2014-05-22	2014	5	22	142			Abundant at this site; occasional in other Carolina bay lakes	Natural Lake Shoreline Swamp (Lake Waccamaw Subtype; Schafale 2012)
7289250	NCSC		024f44f2-a2f5-4daa-b306-c11efb5aa4d0	PreservedSpecimen	35708a0b-b2c1-4369-aee0-e7258ca785a2	NCSC00088474		Plantae	Magnoliophyta		Poales	Cyperaceae	Eleocharis olivacea	Torr.	Eleocharis	olivacea					Weakley, A.S. 2012 (working draft of 30 Nov 2012). Flora of the southern and mid-Atlantic states. Courtesy of the author, University of North Carolina, Chapel Hill.					Howell	LAWA-78	2014-05-22	2014	5	22	142			Rare at this site; absent in other Carolina bay lakes	Natural Lake Shoreline Swamp (Lake Waccamaw Subtype; Schafale 2012)
7289251	NCSC		024f44f2-a2f5-4daa-b306-c11efb5aa4d0	PreservedSpecimen	387ea266-d73d-4852-91ca-047747577f9c	NCSC00088467		Plantae	Magnoliophyta		Poales	Cyperaceae	Dulichium arundinaceum	(L.) Britton	Dulichium	arundinaceum					Weakley, A.S. 2012 (working draft of 30 Nov 2012). Flora of the southern and mid-Atlantic states. Courtesy of the author, University of North Carolina, Chapel Hill.					Howell	LAWA-77	2014-05-22	2014	5	22	142			Occasional at this site; occasional in other Carolina bay lakes	Natural Lake Shoreline Swamp (Lake Waccamaw Subtype; Schafale 2012)
7289252	NCSC		024f44f2-a2f5-4daa-b306-c11efb5aa4d0	PreservedSpecimen	60cae7df-71dc-48e8-a237-ff5b7bfa39f8	NCSC00088401		Plantae	Magnoliophyta		Nymphaeales	Nymphaeaceae	Nymphaea odorata	Ait.	Nymphaea	odorata					Weakley, A.S. 2012 (working draft of 30 Nov 2012). Flora of the southern and mid-Atlantic states. Courtesy of the author, University of North Carolina, Chapel Hill.					Howell	LAWA-76	2014-05-22	2014	5	22	142			Occasional at this site; infrequent in other Carolina bay lakes	Natural Lake Shoreline Swamp (Lake Waccamaw Subtype; Schafale 2012)
7289253	NCSC		024f44f2-a2f5-4daa-b306-c11efb5aa4d0	PreservedSpecimen	4cb5ce6e-cbf8-40f2-89b6-2bfeaa8d947e	NCSC00088267		Plantae	Magnoliophyta		Lamiales	Oleaceae	Fraxinus caroliniana	Mill.	Fraxinus	caroliniana					Weakley, A.S. 2012 (working draft of 30 Nov 2012). Flora of the southern and mid-Atlantic states. Courtesy of the author, University of North Carolina, Chapel Hill.					Howell	LAWA-75	2014-05-22	2014	5	22	142			Infrequent at this site; absent in other Carolina bay lakes	Natural Lake Shoreline Swamp (Lake Waccamaw Subtype; Schafale 2012)
7289254	NCSC		024f44f2-a2f5-4daa-b306-c11efb5aa4d0	PreservedSpecimen	3e060b44-7e65-4d73-91a0-c5da0a5f04fa	NCSC00088411		Plantae	Magnoliophyta		Rosales	Rosaceae	Rosa palustris	Marsh.	Rosa	palustris					Weakley, A.S. 2012 (working draft of 30 Nov 2012). Flora of the southern and mid-Atlantic states. Courtesy of the author, University of North Carolina, Chapel Hill.					Howell	LAWA-74	2014-05-22	2014	5	22	142			Infrequent at this site; rare in other Carolina bay lakes	Natural Lake Shoreline Swamp (Lake Waccamaw Subtype; Schafale 2012)
7289255	NCSC		024f44f2-a2f5-4daa-b306-c11efb5aa4d0	PreservedSpecimen	e8e6f412-cee1-4004-914d-5f6b3f77eb5c	NCSC00088409		Plantae	Magnoliophyta		Rosales	Rosaceae	Rubus pensilvanicus	Poir.	Rubus	pensilvanicus					Weakley, A.S. 2012 (working draft of 30 Nov 2012). Flora of the southern and mid-Atlantic states. Courtesy of the author, University of North Carolina, Chapel Hill.					Howell	LAWA-73	2014-05-22	2014	5	22	142			Infrequent at this site; absent in other Carolina bay lakes	Natural Lake Shoreline Swamp (Lake Waccamaw Subtype; Schafale 2012)
7289256	NCSC		024f44f2-a2f5-4daa-b306-c11efb5aa4d0	PreservedSpecimen	0ae72882-428d-4aa6-af7b-e5a2e036f2e0	NCSC00088418		Plantae	Magnoliophyta		Malpighiales	Salicaceae	Salix nigra	Marsh.	Salix	nigra					Weakley, A.S. 2012 (working draft of 30 Nov 2012). Flora of the southern and mid-Atlantic states. Courtesy of the author, University of North Carolina, Chapel Hill.					Howell	LAWA-72	2014-05-22	2014	5	22	142			Infrequent at this site; absent in other Carolina bay lakes	Natural Lake Shoreline Swamp (Lake Waccamaw Subtype; Schafale 2012)
7289257	NCSC		024f44f2-a2f5-4daa-b306-c11efb5aa4d0	PreservedSpecimen	bc24e320-144a-46bc-a15f-4ff4db951576	NCSC00088243		Plantae	Coniferophyta		Pinales	Pinaceae	Pinus taeda	L.	Pinus	taeda					Weakley, A.S. 2012 (working draft of 30 Nov 2012). Flora of the southern and mid-Atlantic states. Courtesy of the author, University of North Carolina, Chapel Hill.					Howell	LAWA-71	2014-05-22	2014	5	22	142			Rare at this site; infrequent in other Carolina bay lakes	Natural Lake Shoreline Swamp (Lake Waccamaw Subtype; Schafale 2012)
7289258	NCSC		024f44f2-a2f5-4daa-b306-c11efb5aa4d0	PreservedSpecimen	5c202169-fe20-4766-b319-73180cb2f19d	NCSC00088266		Plantae	Magnoliophyta		Lamiales	Oleaceae	Fraxinus caroliniana	Mill.	Fraxinus	caroliniana					Weakley, A.S. 2012 (working draft of 30 Nov 2012). Flora of the southern and mid-Atlantic states. Courtesy of the author, University of North Carolina, Chapel Hill.					Howell	LAWA-70	2014-05-22	2014	5	22	142			Infrequent at this site; absent in other Carolina bay lakes	Natural Lake Shoreline Swamp (Lake Waccamaw Subtype; Schafale 2012)
7289259	NCSC		024f44f2-a2f5-4daa-b306-c11efb5aa4d0	PreservedSpecimen	382273b7-4438-4e00-8625-822f83c469a4	NCSC00088246		Plantae	Magnoliophyta		Poales	Poaceae	Saccharum giganteum	(Walter) Pers.	Saccharum	giganteum					Weakley, A.S. 2012 (working draft of 30 Nov 2012). Flora of the southern and mid-Atlantic states. Courtesy of the author, University of North Carolina, Chapel Hill.					Howell	LAWA-7	2013-09-28	2013	9	28	271			Occasional at this site; infrequent in other Carolina bay lakes	Natural Lake Shoreline Swamp (Lake Waccamaw Subtype; Schafale 2012)
7289260	NCSC		024f44f2-a2f5-4daa-b306-c11efb5aa4d0	PreservedSpecimen	ec818af4-231a-4b52-b22a-9f9478c57a92	NCSC00088644		Plantae	Magnoliophyta		Laurales	Lauraceae	Persea palustris	(Raf.) Sarg.	Persea	palustris					Weakley, A.S. 2012 (working draft of 30 Nov 2012). Flora of the southern and mid-Atlantic states. Courtesy of the author, University of North Carolina, Chapel Hill.					Howell	LAWA-69	2014-05-22	2014	5	22	142			Occasional at this site; occasional in other Carolina bay lakes	Natural Lake Shoreline Swamp (Lake Waccamaw Subtype; Schafale 2012)
7289261	NCSC		024f44f2-a2f5-4daa-b306-c11efb5aa4d0	PreservedSpecimen	fc2918a1-7505-4254-aeb9-091dc41f287d	NCSC00088255		Plantae	Magnoliophyta		Proteales	Platanaceae	Platanus occidentalis	L.	Platanus	occidentalis					Weakley, A.S. 2012 (working draft of 30 Nov 2012). Flora of the southern and mid-Atlantic states. Courtesy of the author, University of North Carolina, Chapel Hill.					Howell	LAWA-68	2014-05-22	2014	5	22	142			Infrequent at this site; absent in other Carolina bay lakes	Natural Lake Shoreline Swamp (Lake Waccamaw Subtype; Schafale 2012)
7289262	NCSC		024f44f2-a2f5-4daa-b306-c11efb5aa4d0	PreservedSpecimen	427e1154-44fd-4677-8729-8f32ea259a09	NCSC00088465		Plantae	Magnoliophyta		Poales	Cyperaceae	Eleocharis equisetoides	(Elliot) Torr.	Eleocharis	equisetoides					Weakley, A.S. 2012 (working draft of 30 Nov 2012). Flora of the southern and mid-Atlantic states. Courtesy of the author, University of North Carolina, Chapel Hill.					Howell			2014						Infrequent at this site; rare in other Carolina bay lakes			field values redacted: eventDate, month, day, startDayOfYear, recordNumber, locality, verbatimElevation, decimalLatitude, decimalLongitude, habitat
7289263	NCSC		024f44f2-a2f5-4daa-b306-c11efb5aa4d0	PreservedSpecimen	e8b1e31e-12be-44dc-b0ce-86ba6c18530b	NCSC00088257		Plantae	Magnoliophyta		Lamiales	Plantaginaceae	Bacopa caroliniana	(Walter) B.L. Rob.	Bacopa	caroliniana					Weakley, A.S. 2012 (working draft of 30 Nov 2012). Flora of the southern and mid-Atlantic states. Courtesy of the author, University of North Carolina, Chapel Hill.					Howell			2014						Rare at this site; absent in other Carolina bay lakes			field values redacted: eventDate, month, day, startDayOfYear, recordNumber, locality, verbatimElevation, decimalLatitude, decimalLongitude, habitat
7289264	NCSC		024f44f2-a2f5-4daa-b306-c11efb5aa4d0	PreservedSpecimen	72f41ec9-e366-40c7-8966-316bb218b2e6	NCSC00088450		Plantae	Magnoliophyta		Caryophyllales	Amaranthaceae	Alternanthera philoxeroides	(Mart.) Griseb.	Alternanthera	philoxeroides					Weakley, A.S. 2012 (working draft of 30 Nov 2012). Flora of the southern and mid-Atlantic states. Courtesy of the author, University of North Carolina, Chapel Hill.					Howell	LAWA-65	2014-05-22	2014	5	22	142			Infrequent at this site; absent in other Carolina bay lakes	Natural Lake Shoreline Swamp (Lake Waccamaw Subtype; Schafale 2012)
7289265	NCSC		024f44f2-a2f5-4daa-b306-c11efb5aa4d0	PreservedSpecimen	5cd8272b-ea89-4ec1-9567-1837f25a75fe	NCSC00088278		Plantae	Magnoliophyta		Vitales	Vitaceae	Muscadinia rotundifolia	(Michx.) Small	Muscadinia	rotundifolia					Weakley, A.S. 2012 (working draft of 30 Nov 2012). Flora of the southern and mid-Atlantic states. Courtesy of the author, University of North Carolina, Chapel Hill.					Howell	LAWA-64	2014-05-22	2014	5	22	142			Occasional at this site; occasional in other Carolina bay lakes	Natural Lake Shoreline Swamp (Lake Waccamaw Subtype; Schafale 2012)
7289266	NCSC		024f44f2-a2f5-4daa-b306-c11efb5aa4d0	PreservedSpecimen	6dace941-7404-4a4a-9406-92f682f37b08	NCSC00088431		Plantae	Magnoliophyta		Fagales	Betulaceae	Betula nigra	L.	Betula	nigra					Weakley, A.S. 2012 (working draft of 30 Nov 2012). Flora of the southern and mid-Atlantic states. Courtesy of the author, University of North Carolina, Chapel Hill.					Howell	LAWA-63	2014-05-22	2014	5	22	142			Occasional at this site; infrequent in other Carolina bay lakes	Natural Lake Shoreline Swamp (Lake Waccamaw Subtype; Schafale 2012)
7289267	NCSC		024f44f2-a2f5-4daa-b306-c11efb5aa4d0	PreservedSpecimen	d6b8346e-d46a-4660-987a-a92132e1dd27	NCSC00088390		Plantae	Magnoliophyta		Magnoliales	Magnoliaceae	Magnolia virginiana	L.	Magnolia	virginiana					Weakley, A.S. 2012 (working draft of 30 Nov 2012). Flora of the southern and mid-Atlantic states. Courtesy of the author, University of North Carolina, Chapel Hill.					Howell	LAWA-62	2014-05-22	2014	5	22	142			Occasional at this site; occasional in other Carolina bay lakes	Natural Lake Shoreline Swamp (Lake Waccamaw Subtype; Schafale 2012)
7289268	NCSC		024f44f2-a2f5-4daa-b306-c11efb5aa4d0	PreservedSpecimen	a1b69d6f-484b-45dd-958d-ca6a2f19fc37	NCSC00088643		Plantae	Magnoliophyta		Laurales	Lauraceae	Persea palustris	(Raf.) Sarg.	Persea	palustris					Weakley, A.S. 2012 (working draft of 30 Nov 2012). Flora of the southern and mid-Atlantic states. Courtesy of the author, University of North Carolina, Chapel Hill.					Howell	LAWA-61	2014-05-22	2014	5	22	142			Occasional at this site; occasional in other Carolina bay lakes	Natural Lake Shoreline Swamp (Lake Waccamaw Subtype; Schafale 2012)
7289269	NCSC		024f44f2-a2f5-4daa-b306-c11efb5aa4d0	PreservedSpecimen	9d2695ae-caf8-430d-84c7-6ccb38445ae2	NCSC00088632		Plantae	Magnoliophyta		Asparagales	Hypoxidaceae	Hypoxis curtissii	Rose	Hypoxis	curtissii					Weakley, A.S. 2012 (working draft of 30 Nov 2012). Flora of the southern and mid-Atlantic states. Courtesy of the author, University of North Carolina, Chapel Hill.					Howell	LAWA-60	2014-05-22	2014	5	22	142			Rare at this site; absent in other Carolina bay lakes	Natural Lake Shoreline Swamp (Lake Waccamaw Subtype; Schafale 2012)
7289270	NCSC		024f44f2-a2f5-4daa-b306-c11efb5aa4d0	PreservedSpecimen	d53e0ad6-b4b9-464f-b5ba-1a2f8d218489	NCSC00088422		Plantae	Magnoliophyta		Asterales	Asteraceae	Eupatorium mohrii x paludicola								Weakley, A.S. 2012 (working draft of 30 Nov 2012). Flora of the southern and mid-Atlantic states. Courtesy of the author, University of North Carolina, Chapel Hill.					Howell	LAWA-6	2013-09-28	2013	9	28	271			Rare at this site; absent in other Carolina bay lakes	Natural Lake Shoreline Swamp (Lake Waccamaw Subtype; Schafale 2012)
7289271	NCSC		024f44f2-a2f5-4daa-b306-c11efb5aa4d0	PreservedSpecimen	67ad7c75-a5e5-4221-8612-0ff2794a5491	NCSC00088437		Plantae	Pteridophyta	Polypodiopsida	Polypodiales	Blechnaceae	Anchistea virginica	C.Presl	Anchistea	virginica					Weakley, A.S. 2012 (working draft of 30 Nov 2012). Flora of the southern and mid-Atlantic states. Courtesy of the author, University of North Carolina, Chapel Hill.					Howell	LAWA-59	2014-05-22	2014	5	22	142			Infrequent at this site; occasional in other Carolina bay lakes	Natural Lake Shoreline Swamp (Lake Waccamaw Subtype; Schafale 2012)
7289272	NCSC		024f44f2-a2f5-4daa-b306-c11efb5aa4d0	PreservedSpecimen	90ce0b9c-5fad-4c4c-a605-53ea796768fc	NCSC00088258		Plantae	Pteridophyta	Polypodiopsida	Osmundales	Osmundaceae	Osmunda spectabilis	Willd.	Osmunda	spectabilis					Weakley, A.S. 2012 (working draft of 30 Nov 2012). Flora of the southern and mid-Atlantic states. Courtesy of the author, University of North Carolina, Chapel Hill.					Howell	LAWA-58	2014-05-22	2014	5	22	142			Infrequent at this site; absent in other Carolina bay lakes	Natural Lake Shoreline Swamp (Lake Waccamaw Subtype; Schafale 2012)
7289273	NCSC		024f44f2-a2f5-4daa-b306-c11efb5aa4d0	PreservedSpecimen	567a05e5-47e8-4522-81cd-03f8f619c09c	NCSC00088446		Plantae	Magnoliophyta		Alismatales	Alismataceae	Sagittaria graminea	Michx.	Sagittaria	graminea					Weakley, A.S. 2012 (working draft of 30 Nov 2012). Flora of the southern and mid-Atlantic states. Courtesy of the author, University of North Carolina, Chapel Hill.					Howell	LAWA-57	2014-05-22	2014	5	22	142			Frequent at this site; absent in other Carolina bay lakes	Natural Lake Shoreline Swamp (Lake Waccamaw Subtype; Schafale 2012)
7289274	NCSC		024f44f2-a2f5-4daa-b306-c11efb5aa4d0	PreservedSpecimen	a9dddb26-1a9b-44d9-889c-b2be227bb262	NCSC00088404		Plantae	Magnoliophyta		Cornales	Nyssaceae	Nyssa aquatica	L.	Nyssa	aquatica					Weakley, A.S. 2012 (working draft of 30 Nov 2012). Flora of the southern and mid-Atlantic states. Courtesy of the author, University of North Carolina, Chapel Hill.					Howell	LAWA-56	2014-05-22	2014	5	22	142			Infrequent at this site; absent in other Carolina bay lakes	Natural Lake Shoreline Swamp (Lake Waccamaw Subtype; Schafale 2012)
7289275	NCSC		024f44f2-a2f5-4daa-b306-c11efb5aa4d0	PreservedSpecimen	f8b9e85f-b80a-468b-b607-3dbfaf45a75f	NCSC00088273		Plantae	Magnoliophyta		Liliales	Smilacaceae	Smilax walteri	Pursh	Smilax	walteri					Weakley, A.S. 2012 (working draft of 30 Nov 2012). Flora of the southern and mid-Atlantic states. Courtesy of the author, University of North Carolina, Chapel Hill.					Howell	LAWA-55	2014-05-22	2014	5	22	142			Occasional at this site; infrequent in other Carolina bay lakes	Natural Lake Shoreline Swamp (Lake Waccamaw Subtype; Schafale 2012)
7289276	NCSC		024f44f2-a2f5-4daa-b306-c11efb5aa4d0	PreservedSpecimen	84a475e2-c999-41e8-b2ef-3369a7461cab	NCSC00088394		Plantae	Magnoliophyta		Asterales	Menyanthaceae	Nymphoides aquatica	(J.F. Gmel.) Kuntze	Nymphoides	aquatica					Weakley, A.S. 2012 (working draft of 30 Nov 2012). Flora of the southern and mid-Atlantic states. Courtesy of the author, University of North Carolina, Chapel Hill.					Howell	LAWA-54	2014-05-22	2014	5	22	142			Occasional at this site; absent in other Carolina bay lakes	Natural Lake Shoreline Swamp (Lake Waccamaw Subtype; Schafale 2012)
7289277	NCSC		024f44f2-a2f5-4daa-b306-c11efb5aa4d0	PreservedSpecimen	5572defc-1abd-4ebd-af39-ff92fffbdb6e	NCSC00088458		Plantae	Magnoliophyta		Apiales	Araliaceae	Hydrocotyle spp.								Weakley, A.S. 2012 (working draft of 30 Nov 2012). Flora of the southern and mid-Atlantic states. Courtesy of the author, University of North Carolina, Chapel Hill.					Howell	LAWA-53	2014-05-22	2014	5	22	142			Frequent at this site; rare in other Carolina bay lakes	Natural Lake Shoreline Swamp (Lake Waccamaw Subtype; Schafale 2012)
7289278	NCSC		024f44f2-a2f5-4daa-b306-c11efb5aa4d0	PreservedSpecimen	e6f497ed-51b8-4d3c-9f28-3736a631351f	NCSC00088621		Plantae	Magnoliophyta		Poales	Eriocaulaceae	Eriocaulon aquaticum	(Hill) Druce	Eriocaulon	aquaticum					Weakley, A.S. 2012 (working draft of 30 Nov 2012). Flora of the southern and mid-Atlantic states. Courtesy of the author, University of North Carolina, Chapel Hill.					Howell			2014						Abundant at this site; absent in other Carolina bay lakes			field values redacted: eventDate, month, day, startDayOfYear, recordNumber, locality, verbatimElevation, decimalLatitude, decimalLongitude, habitat
7289279	NCSC		024f44f2-a2f5-4daa-b306-c11efb5aa4d0	PreservedSpecimen	7193899d-55c8-477a-a528-4796c7bc6ef2	NCSC00088247		Plantae	Magnoliophyta		Poales	Poaceae	Luziola fluitans	(Michx.) Terrell & H. Rob.	Luziola	fluitans					Weakley, A.S. 2012 (working draft of 30 Nov 2012). Flora of the southern and mid-Atlantic states. Courtesy of the author, University of North Carolina, Chapel Hill.					Howell			2014						Occasional at this site; absent in other Carolina bay lakes			field values redacted: eventDate, month, day, startDayOfYear, recordNumber, locality, verbatimElevation, decimalLatitude, decimalLongitude, habitat
7289280	NCSC		024f44f2-a2f5-4daa-b306-c11efb5aa4d0	PreservedSpecimen	1302a9f5-468e-4e15-be74-70cbe322eccc	NCSC00088270		Plantae	Magnoliophyta		Commelinales	Pontederiaceae	Pontederia cordata	L.	Pontederia	cordata					Weakley, A.S. 2012 (working draft of 30 Nov 2012). Flora of the southern and mid-Atlantic states. Courtesy of the author, University of North Carolina, Chapel Hill.					Howell	LAWA-50	2014-05-22	2014	5	22	142			Occasional at this site; infrequent in other Carolina bay lakes	Natural Lake Shoreline Swamp (Lake Waccamaw Subtype; Schafale 2012)
7289281	NCSC		024f44f2-a2f5-4daa-b306-c11efb5aa4d0	PreservedSpecimen	0171c86b-f6e2-4eea-9cf2-940dd01b89e4	NCSC00088620		Plantae	Magnoliophyta		Poales	Eriocaulaceae	Eriocaulon aquaticum	(Hill) Druce	Eriocaulon	aquaticum					Weakley, A.S. 2012 (working draft of 30 Nov 2012). Flora of the southern and mid-Atlantic states. Courtesy of the author, University of North Carolina, Chapel Hill.					Howell			2013						Abundant at this site; absent in other Carolina bay lakes			field values redacted: eventDate, month, day, startDayOfYear, recordNumber, locality, verbatimElevation, decimalLatitude, decimalLongitude, habitat
7289282	NCSC		024f44f2-a2f5-4daa-b306-c11efb5aa4d0	PreservedSpecimen	8ebccc01-2e93-4eab-822f-ce7afca846c2	NCSC00088617		Plantae	Magnoliophyta		Ericales	Ericaceae	Vaccinium fuscatum	Aiton	Vaccinium	fuscatum					Weakley, A.S. 2012 (working draft of 30 Nov 2012). Flora of the southern and mid-Atlantic states. Courtesy of the author, University of North Carolina, Chapel Hill.					Howell	LAWA-49	2014-04-11	2014	4	11	101			Occasional at this site; occasional in other Carolina bay lakes	Natural Lake Shoreline Swamp (Lake Waccamaw Subtype; Schafale 2012)
7289283	NCSC		024f44f2-a2f5-4daa-b306-c11efb5aa4d0	PreservedSpecimen	cf7791ee-f2e6-4068-9be4-e19271e8da37	NCSC00088408		Plantae	Magnoliophyta		Rosales	Rosaceae	Amelanchier obovalis	(Michx.) Ashe	Amelanchier	obovalis					Weakley, A.S. 2012 (working draft of 30 Nov 2012). Flora of the southern and mid-Atlantic states. Courtesy of the author, University of North Carolina, Chapel Hill.					Howell	LAWA-48	2014-04-11	2014	4	11	101			Rare at this site; absent in other Carolina bay lakes	Natural Lake Shoreline Swamp (Lake Waccamaw Subtype; Schafale 2012)
7289284	NCSC		024f44f2-a2f5-4daa-b306-c11efb5aa4d0	PreservedSpecimen	4e2bcd94-eabd-45f1-9ce7-b2a047129dcc	NCSC00088268		Plantae	Pteridophyta	Polypodiopsida	Polypodiales	Polypodiaceae	Pleopeltis polypodiodes	(L.) E.G. Andrews & Windham							Weakley, A.S. 2012 (working draft of 30 Nov 2012). Flora of the southern and mid-Atlantic states. Courtesy of the author, University of North Carolina, Chapel Hill.					Howell	LAWA-47	2014-04-11	2014	4	11	101			Rare at this site; infrequent in other Carolina bay lakes	Natural Lake Shoreline Swamp (Lake Waccamaw Subtype; Schafale 2012)
7289285	NCSC		024f44f2-a2f5-4daa-b306-c11efb5aa4d0	PreservedSpecimen	a0c54a98-db89-4f99-b3bc-cc9f030b8504	NCSC00088438		Plantae	Magnoliophyta		Poales	Bromeliaceae	Tillandsia usneoides	L.	Tillandsia	usneoides					Weakley, A.S. 2012 (working draft of 30 Nov 2012). Flora of the southern and mid-Atlantic states. Courtesy of the author, University of North Carolina, Chapel Hill.					Howell	LAWA-46	2014-04-11	2014	4	11	101			Frequent at this site; frequent in other Carolina bay lakes	Natural Lake Shoreline Swamp (Lake Waccamaw Subtype; Schafale 2012)
7289286	NCSC		024f44f2-a2f5-4daa-b306-c11efb5aa4d0	PreservedSpecimen	f5b46524-30d5-421d-aa4c-a5c322d9783f	NCSC00088445		Plantae	Magnoliophyta		Saxifragales	Altingiaceae	Liquidambar styraciflua	L.	Liquidambar	styraciflua					Weakley, A.S. 2012 (working draft of 30 Nov 2012). Flora of the southern and mid-Atlantic states. Courtesy of the author, University of North Carolina, Chapel Hill.					Howell	LAWA-45	2014-04-11	2014	4	11	101			Occasional at this site; infrequent in other Carolina bay lakes	Natural Lake Shoreline Swamp (Lake Waccamaw Subtype; Schafale 2012)
7289287	NCSC		024f44f2-a2f5-4daa-b306-c11efb5aa4d0	PreservedSpecimen	0fe22466-baac-4c75-8b74-d6c9398112cd	NCSC00088419		Plantae	Magnoliophyta		Sapindales	Sapindaceae	Acer rubrum	Wats.	Acer	rubrum					Weakley, A.S. 2012 (working draft of 30 Nov 2012). Flora of the southern and mid-Atlantic states. Courtesy of the author, University of North Carolina, Chapel Hill.					Howell	LAWA-44	2014-04-11	2014	4	11	101			Occasional at this site; occasional in other Carolina bay lakes	Natural Lake Shoreline Swamp (Lake Waccamaw Subtype; Schafale 2012)
7289288	NCSC		024f44f2-a2f5-4daa-b306-c11efb5aa4d0	PreservedSpecimen	47c730c4-99b7-46f0-9bde-586e9ec23df2	NCSC00088272		Plantae	Magnoliophyta		Sapindales	Sapindaceae	Acer rubrum	Wats.	Acer	rubrum					Weakley, A.S. 2012 (working draft of 30 Nov 2012). Flora of the southern and mid-Atlantic states. Courtesy of the author, University of North Carolina, Chapel Hill.					Howell	LAWA-43	2014-04-11	2014	4	11	101			Occasional at this site; occasional in other Carolina bay lakes	Natural Lake Shoreline Swamp (Lake Waccamaw Subtype; Schafale 2012)
7289289	NCSC		024f44f2-a2f5-4daa-b306-c11efb5aa4d0	PreservedSpecimen	7a226c1d-db15-41a3-8dfb-f1b82b24e77b	NCSC00088442		Plantae	Magnoliophyta		Ericales	Clethraceae	Clethra alnifolia	L.	Clethra	alnifolia					Weakley, A.S. 2012 (working draft of 30 Nov 2012). Flora of the southern and mid-Atlantic states. Courtesy of the author, University of North Carolina, Chapel Hill.					Howell	LAWA-42	2014-04-11	2014	4	11	101			Occasional at this site; occasional in other Carolina bay lakes	Natural Lake Shoreline Swamp (Lake Waccamaw Subtype; Schafale 2012)
7289290	NCSC		024f44f2-a2f5-4daa-b306-c11efb5aa4d0	PreservedSpecimen	b11bdb01-2a54-43a0-83eb-c61578fc5023	NCSC00088625		Plantae	Magnoliophyta		Gentianales	Gelsemiaceae	Gelsemium sempervirens	Ait.	Gelsemium	sempervirens					Weakley, A.S. 2012 (working draft of 30 Nov 2012). Flora of the southern and mid-Atlantic states. Courtesy of the author, University of North Carolina, Chapel Hill.					Howell	LAWA-41	2014-04-11	2014	4	11	101			Occasional at this site; occasional in other Carolina bay lakes	Natural Lake Shoreline Swamp (Lake Waccamaw Subtype; Schafale 2012)
7289291	NCSC		024f44f2-a2f5-4daa-b306-c11efb5aa4d0	PreservedSpecimen	cae3cb81-45da-4187-a5c6-8c530fffa7f3	NCSC00088615		Plantae	Magnoliophyta		Ericales	Ericaceae	Eubotrys racemosa	(L.) Nutt.	Eubotrys	racemosa					Weakley, A.S. 2012 (working draft of 30 Nov 2012). Flora of the southern and mid-Atlantic states. Courtesy of the author, University of North Carolina, Chapel Hill.					Howell	LAWA-40	2014-04-11	2014	4	11	101			Occasional at this site; occasional in other Carolina bay lakes	Natural Lake Shoreline Swamp (Lake Waccamaw Subtype; Schafale 2012)
7289292	NCSC		024f44f2-a2f5-4daa-b306-c11efb5aa4d0	PreservedSpecimen	7a1c19ef-dab6-4042-986d-7b379469544d	NCSC00088640		Plantae	Magnoliophyta		Lamiales	Lamiaceae	Lycopus angustifolius	Elliot	Lycopus	angustifolius					Weakley, A.S. 2012 (working draft of 30 Nov 2012). Flora of the southern and mid-Atlantic states. Courtesy of the author, University of North Carolina, Chapel Hill.					Howell			2013						Infrequent at this site; absent in other Carolina bay lakes			field values redacted: eventDate, month, day, startDayOfYear, recordNumber, locality, verbatimElevation, decimalLatitude, decimalLongitude, habitat
7289293	NCSC		024f44f2-a2f5-4daa-b306-c11efb5aa4d0	PreservedSpecimen	a9f8d172-2a7b-4642-adfe-e0aa28ca1818	NCSC00088435		Plantae	Magnoliophyta		Fagales	Betulaceae	Alnus serrulata	(Aiton) Willd.	Alnus	serrulata					Weakley, A.S. 2012 (working draft of 30 Nov 2012). Flora of the southern and mid-Atlantic states. Courtesy of the author, University of North Carolina, Chapel Hill.					Howell	LAWA-39	2014-04-11	2014	4	11	101			Occasional at this site; absent in other Carolina bay lakes	Natural Lake Shoreline Swamp (Lake Waccamaw Subtype; Schafale 2012)
7289294	NCSC		024f44f2-a2f5-4daa-b306-c11efb5aa4d0	PreservedSpecimen	1a15c56a-7236-4aaa-b9ce-17a42c04eb84	NCSC00088407		Plantae	Magnoliophyta		Rosales	Rhamnaceae	Berchemia scandens	(Hill) K. Koch	Berchemia	scandens					Weakley, A.S. 2012 (working draft of 30 Nov 2012). Flora of the southern and mid-Atlantic states. Courtesy of the author, University of North Carolina, Chapel Hill.					Howell	LAWA-38	2014-04-11	2014	4	11	101			Occasional at this site; absent in other Carolina bay lakes	Natural Lake Shoreline Swamp (Lake Waccamaw Subtype; Schafale 2012)
7289295	NCSC		024f44f2-a2f5-4daa-b306-c11efb5aa4d0	PreservedSpecimen	635474b4-fb07-423e-a9e1-41d310644c98	NCSC00088434		Plantae	Magnoliophyta		Fagales	Betulaceae	Betula nigra	L.	Betula	nigra					Weakley, A.S. 2012 (working draft of 30 Nov 2012). Flora of the southern and mid-Atlantic states. Courtesy of the author, University of North Carolina, Chapel Hill.					Howell	LAWA-37	2014-04-11	2014	4	11	101			Occasional at this site; infrequent in other Carolina bay lakes	Natural Lake Shoreline Swamp (Lake Waccamaw Subtype; Schafale 2012)
7289296	NCSC		024f44f2-a2f5-4daa-b306-c11efb5aa4d0	PreservedSpecimen	841fa610-9111-4ffd-a13d-65f6b3558fcc	NCSC00088399		Plantae	Magnoliophyta		Fagales	Myricaceae	Morella cerifera	Small	Morella	cerifera					Weakley, A.S. 2012 (working draft of 30 Nov 2012). Flora of the southern and mid-Atlantic states. Courtesy of the author, University of North Carolina, Chapel Hill.					Howell	LAWA-36	2014-04-11	2014	4	11	101			Occasional at this site; occasional in other Carolina bay lakes	Natural Lake Shoreline Swamp (Lake Waccamaw Subtype; Schafale 2012)
7289297	NCSC		024f44f2-a2f5-4daa-b306-c11efb5aa4d0	PreservedSpecimen	4ab9fb73-e503-4348-aeae-cd2713494018	NCSC00088619		Plantae	Magnoliophyta		Ericales	Ericaceae	Lyonia lucida	(Lam.) K. Koch	Lyonia	lucida					Weakley, A.S. 2012 (working draft of 30 Nov 2012). Flora of the southern and mid-Atlantic states. Courtesy of the author, University of North Carolina, Chapel Hill.					Howell	LAWA-35	2014-03-21	2014	3	21	80			Occasional at this site; frequent in other Carolina bay lakes	Natural Lake Shoreline Swamp (Lake Waccamaw Subtype; Schafale 2012)
7289298	NCSC		024f44f2-a2f5-4daa-b306-c11efb5aa4d0	PreservedSpecimen	b2550040-7750-4767-91c3-ee6bf08d7cde	NCSC00088276		Plantae	Magnoliophyta		Liliales	Smilacaceae	Smilax laurifolia	L.	Smilax	laurifolia					Weakley, A.S. 2012 (working draft of 30 Nov 2012). Flora of the southern and mid-Atlantic states. Courtesy of the author, University of North Carolina, Chapel Hill.					Howell	LAWA-34	2014-03-21	2014	3	21	80			Infrequent at this site; frequent in other Carolina bay lakes	Natural Lake Shoreline Swamp (Lake Waccamaw Subtype; Schafale 2012)
7289299	NCSC		024f44f2-a2f5-4daa-b306-c11efb5aa4d0	PreservedSpecimen	c7d2738b-63ba-40d2-9e02-46a1999ffbbb	NCSC00088265		Plantae	Magnoliophyta		Myrtales	Onagraceae	Ludwigia sphaerocarpa	Elliot	Ludwigia	sphaerocarpa					Weakley, A.S. 2012 (working draft of 30 Nov 2012). Flora of the southern and mid-Atlantic states. Courtesy of the author, University of North Carolina, Chapel Hill.					Howell			2014						Occasional at this site; absent in other Carolina bay lakes			field values redacted: eventDate, month, day, startDayOfYear, recordNumber, locality, verbatimElevation, decimalLatitude, decimalLongitude, habitat
7289300	NCSC		024f44f2-a2f5-4daa-b306-c11efb5aa4d0	PreservedSpecimen	d8d4614e-9a99-4a91-9b09-96da36908223	NCSC00088639		Plantae	Magnoliophyta		Poales	Juncaceae	Juncus canadensis	J. Gay ex Laharpe	Juncus	canadensis					Weakley, A.S. 2012 (working draft of 30 Nov 2012). Flora of the southern and mid-Atlantic states. Courtesy of the author, University of North Carolina, Chapel Hill.					Howell	LAWA-32	2014-03-21	2014	3	21	80			Infrequent at this site; absent in other Carolina bay lakes	Natural Lake Shoreline Swamp (Lake Waccamaw Subtype; Schafale 2012)
7289301	NCSC		024f44f2-a2f5-4daa-b306-c11efb5aa4d0	PreservedSpecimen	7d2ec669-1406-4145-a89c-ee7a193d181f	NCSC00088636		Plantae	Magnoliophyta		Poales	Juncaceae	Juncus repens	Michx.	Juncus	repens					Weakley, A.S. 2012 (working draft of 30 Nov 2012). Flora of the southern and mid-Atlantic states. Courtesy of the author, University of North Carolina, Chapel Hill.					Howell	LAWA-31	2014-03-21	2014	3	21	80			Occasional at this site; occasional in other Carolina bay lakes	Natural Lake Shoreline Swamp (Lake Waccamaw Subtype; Schafale 2012)
7289302	NCSC		024f44f2-a2f5-4daa-b306-c11efb5aa4d0	PreservedSpecimen	f9ec5491-243f-4ff6-9e5a-201c3abdccea	NCSC00088637		Plantae	Magnoliophyta		Poales	Juncaceae	Juncus repens	Michx.	Juncus	repens					Weakley, A.S. 2012 (working draft of 30 Nov 2012). Flora of the southern and mid-Atlantic states. Courtesy of the author, University of North Carolina, Chapel Hill.					Howell	LAWA-30	2014-03-21	2014	3	21	80			Occasional at this site; occasional in other Carolina bay lakes	Natural Lake Shoreline Swamp (Lake Waccamaw Subtype; Schafale 2012)
7289303	NCSC		024f44f2-a2f5-4daa-b306-c11efb5aa4d0	PreservedSpecimen	19f9feac-a34f-46e0-9d86-f6f69714238c	NCSC00088635		Plantae	Magnoliophyta		Poales	Juncaceae	Juncus pelocarpus	E. Mey.	Juncus	pelocarpus					Weakley, A.S. 2012 (working draft of 30 Nov 2012). Flora of the southern and mid-Atlantic states. Courtesy of the author, University of North Carolina, Chapel Hill.					Howell	LAWA-3	2013-09-28	2013	9	28	271			Frequent at this site; occasional in other Carolina bay lakes	Natural Lake Shoreline Swamp (Lake Waccamaw Subtype; Schafale 2012)
7289304	NCSC		024f44f2-a2f5-4daa-b306-c11efb5aa4d0	PreservedSpecimen	9aef4a24-aae3-4fdd-8c5f-ce7e86871e49	NCSC00088274		Plantae	Magnoliophyta		Liliales	Smilacaceae	Smilax walteri	Pursh	Smilax	walteri					Weakley, A.S. 2012 (working draft of 30 Nov 2012). Flora of the southern and mid-Atlantic states. Courtesy of the author, University of North Carolina, Chapel Hill.					Howell	LAWA-29	2014-03-21	2014	3	21	80			Occasional at this site; infrequent in other Carolina bay lakes	Natural Lake Shoreline Swamp (Lake Waccamaw Subtype; Schafale 2012)
7289305	NCSC		024f44f2-a2f5-4daa-b306-c11efb5aa4d0	PreservedSpecimen	5dfd6de0-481a-45bd-936f-58692f56963b	NCSC00088395		Plantae	Magnoliophyta		Asterales	Menyanthaceae	Nymphoides aquatica	(J.F. Gmel.) Kuntze	Nymphoides	aquatica					Weakley, A.S. 2012 (working draft of 30 Nov 2012). Flora of the southern and mid-Atlantic states. Courtesy of the author, University of North Carolina, Chapel Hill.					Howell	LAWA-28	2014-03-21	2014	3	21	80			Occasional at this site; absent in other Carolina bay lakes	Natural Lake Shoreline Swamp (Lake Waccamaw Subtype; Schafale 2012)
7289306	NCSC		024f44f2-a2f5-4daa-b306-c11efb5aa4d0	PreservedSpecimen	8e4bfd9b-aaa3-4030-bf33-9433e36ca231	NCSC00088403		Plantae	Magnoliophyta		Nymphaeales	Nymphaeaceae	Nymphaea odorata	Ait.	Nymphaea	odorata					Weakley, A.S. 2012 (working draft of 30 Nov 2012). Flora of the southern and mid-Atlantic states. Courtesy of the author, University of North Carolina, Chapel Hill.					Howell	LAWA-27	2014-03-21	2014	3	21	80			Occasional at this site; infrequent in other Carolina bay lakes	Natural Lake Shoreline Swamp (Lake Waccamaw Subtype; Schafale 2012)
7289307	NCSC		024f44f2-a2f5-4daa-b306-c11efb5aa4d0	PreservedSpecimen	dffe7e16-1de8-4642-9ac5-518ce572cd7a	NCSC00088466		Plantae	Magnoliophyta		Poales	Cyperaceae	Dulichium arundinaceum	(L.) Britton	Dulichium	arundinaceum					Weakley, A.S. 2012 (working draft of 30 Nov 2012). Flora of the southern and mid-Atlantic states. Courtesy of the author, University of North Carolina, Chapel Hill.					Howell	LAWA-26	2014-03-21	2014	3	21	80			Occasional at this site; occasional in other Carolina bay lakes	Natural Lake Shoreline Swamp (Lake Waccamaw Subtype; Schafale 2012)
7289308	NCSC		024f44f2-a2f5-4daa-b306-c11efb5aa4d0	PreservedSpecimen	343a9a33-0e35-41a6-91eb-240c14b1553f	NCSC00088451		Plantae	Magnoliophyta		Apiales	Apiaceae	Centella asiatica	(L.) Urban	Centella	asiatica					Weakley, A.S. 2012 (working draft of 30 Nov 2012). Flora of the southern and mid-Atlantic states. Courtesy of the author, University of North Carolina, Chapel Hill.					Howell	LAWA-25	2014-03-21	2014	3	21	80			Frequent at this site; absent in other Carolina bay lakes	Natural Lake Shoreline Swamp (Lake Waccamaw Subtype; Schafale 2012)
7289309	NCSC		024f44f2-a2f5-4daa-b306-c11efb5aa4d0	PreservedSpecimen	f123a082-80bb-4e27-a41a-d31074ea2b52	NCSC00088457		Plantae	Magnoliophyta		Apiales	Araliaceae	Hydrocotyle spp.								Weakley, A.S. 2012 (working draft of 30 Nov 2012). Flora of the southern and mid-Atlantic states. Courtesy of the author, University of North Carolina, Chapel Hill.					Howell	LAWA-24	2014-03-21	2014	3	21	80			Frequent at this site; rare in other Carolina bay lakes	Natural Lake Shoreline Swamp (Lake Waccamaw Subtype; Schafale 2012)
7289310	NCSC		024f44f2-a2f5-4daa-b306-c11efb5aa4d0	PreservedSpecimen	379c5250-908c-4093-b373-c88c4a7f8441	NCSC00088430		Plantae	Magnoliophyta		Asterales	Asteraceae	Sclerolepis uniflora	(Walter) Britton, Sterns & Poggenb.	Sclerolepis	uniflora					Weakley, A.S. 2012 (working draft of 30 Nov 2012). Flora of the southern and mid-Atlantic states. Courtesy of the author, University of North Carolina, Chapel Hill.					Howell			2014						Frequent at this site; absent in other Carolina bay lakes			field values redacted: eventDate, month, day, startDayOfYear, recordNumber, locality, verbatimElevation, decimalLatitude, decimalLongitude, habitat
7289311	NCSC		024f44f2-a2f5-4daa-b306-c11efb5aa4d0	PreservedSpecimen	16239d68-da22-48fb-8f30-ddd8f9b0c6b1	NCSC00088420		Plantae	Magnoliophyta		Sapindales	Sapindaceae	Acer rubrum	Wats.	Acer	rubrum					Weakley, A.S. 2012 (working draft of 30 Nov 2012). Flora of the southern and mid-Atlantic states. Courtesy of the author, University of North Carolina, Chapel Hill.					Howell	LAWA-22	2014-03-21	2014	3	21	80			Occasional at this site; occasional in other Carolina bay lakes	Natural Lake Shoreline Swamp (Lake Waccamaw Subtype; Schafale 2012)
7289312	NCSC		024f44f2-a2f5-4daa-b306-c11efb5aa4d0	PreservedSpecimen	8a460239-2346-4156-bdf7-db9658dfe315	NCSC00088398		Plantae	Magnoliophyta		Fagales	Myricaceae	Morella cerifera	Small	Morella	cerifera					Weakley, A.S. 2012 (working draft of 30 Nov 2012). Flora of the southern and mid-Atlantic states. Courtesy of the author, University of North Carolina, Chapel Hill.					Howell	LAWA-21	2014-03-21	2014	3	21	80			Occasional at this site; occasional in other Carolina bay lakes	Natural Lake Shoreline Swamp (Lake Waccamaw Subtype; Schafale 2012)
7289313	NCSC		024f44f2-a2f5-4daa-b306-c11efb5aa4d0	PreservedSpecimen	fb0d7393-846b-49a8-b7a4-e2c4a1d3c61a	NCSC00088628		Plantae	Magnoliophyta		Malpighiales	Hypericaceae	Hypericum walteri	J.G. Gmel.	Hypericum	walteri					Weakley, A.S. 2012 (working draft of 30 Nov 2012). Flora of the southern and mid-Atlantic states. Courtesy of the author, University of North Carolina, Chapel Hill.					Howell	LAWA-20	2013-09-28	2013	9	28	271			Occasional at this site; absent in other Carolina bay lakes	Natural Lake Shoreline Swamp (Lake Waccamaw Subtype; Schafale 2012)
7289314	NCSC		024f44f2-a2f5-4daa-b306-c11efb5aa4d0	PreservedSpecimen	ebd1c718-8494-4958-af59-d4cb75ccce0b	NCSC00088460		Plantae	Magnoliophyta		Asterales	Asteraceae	Pluchea baccharis	(Mill.) Pruski	Pluchea	baccharis					Weakley, A.S. 2012 (working draft of 30 Nov 2012). Flora of the southern and mid-Atlantic states. Courtesy of the author, University of North Carolina, Chapel Hill.					Howell	LAWA-2	2013-09-28	2013	9	28	271			Frequent at this site; absent in other Carolina bay lakes	Natural Lake Shoreline Swamp (Lake Waccamaw Subtype; Schafale 2012)
7289315	NCSC		024f44f2-a2f5-4daa-b306-c11efb5aa4d0	PreservedSpecimen	55510eb5-326f-4c50-9f27-604b50faa270	NCSC00088449		Plantae	Magnoliophyta		Alismatales	Alismataceae	Sagittaria graminea	Michx.	Sagittaria	graminea					Weakley, A.S. 2012 (working draft of 30 Nov 2012). Flora of the southern and mid-Atlantic states. Courtesy of the author, University of North Carolina, Chapel Hill.					Howell	LAWA-19	2013-09-28	2013	9	28	271			Frequent at this site; absent in other Carolina bay lakes	Natural Lake Shoreline Swamp (Lake Waccamaw Subtype; Schafale 2012)
7289316	NCSC		024f44f2-a2f5-4daa-b306-c11efb5aa4d0	PreservedSpecimen	a4abf6e5-b1c3-482d-bf95-7b9fa2ed9ef0	NCSC00088428		Plantae	Magnoliophyta		Asterales	Asteraceae	Sclerolepis uniflora	(Walter) Britton, Sterns & Poggenb.	Sclerolepis	uniflora					Weakley, A.S. 2012 (working draft of 30 Nov 2012). Flora of the southern and mid-Atlantic states. Courtesy of the author, University of North Carolina, Chapel Hill.					Howell			2013						Frequent at this site; absent in other Carolina bay lakes			field values redacted: eventDate, month, day, startDayOfYear, recordNumber, locality, verbatimElevation, decimalLatitude, decimalLongitude, habitat
7289317	NCSC		024f44f2-a2f5-4daa-b306-c11efb5aa4d0	PreservedSpecimen	32e412b8-050e-4f2e-88f7-03198c7db0d7	NCSC00088433		Plantae	Magnoliophyta		Fagales	Betulaceae	Alnus serrulata	(Aiton) Willd.	Alnus	serrulata					Weakley, A.S. 2012 (working draft of 30 Nov 2012). Flora of the southern and mid-Atlantic states. Courtesy of the author, University of North Carolina, Chapel Hill.					Howell	LAWA-170	2014-10-04	2014	10	4	277			Occasional at this site; absent in other Carolina bay lakes	Natural Lake Shoreline Swamp (Lake Waccamaw Subtype; Schafale 2012)
7289318	NCSC		024f44f2-a2f5-4daa-b306-c11efb5aa4d0	PreservedSpecimen	971afdd3-b5a2-4b9f-ade2-c013720b45b3	NCSC00088402		Plantae	Magnoliophyta		Nymphaeales	Nymphaeaceae	Nymphaea odorata	Ait.	Nymphaea	odorata					Weakley, A.S. 2012 (working draft of 30 Nov 2012). Flora of the southern and mid-Atlantic states. Courtesy of the author, University of North Carolina, Chapel Hill.					Howell	LAWA-17	2013-09-28	2013	9	28	271			Occasional at this site; infrequent in other Carolina bay lakes	Natural Lake Shoreline Swamp (Lake Waccamaw Subtype; Schafale 2012)
7289319	NCSC		024f44f2-a2f5-4daa-b306-c11efb5aa4d0	PreservedSpecimen	2fd1f36e-27e6-47f9-b8c8-b955999a0d90	NCSC00088397		Plantae	Magnoliophyta		Fagales	Myricaceae	Morella cerifera	Small	Morella	cerifera					Weakley, A.S. 2012 (working draft of 30 Nov 2012). Flora of the southern and mid-Atlantic states. Courtesy of the author, University of North Carolina, Chapel Hill.					Howell	LAWA-169	2014-10-04	2014	10	4	277			Occasional at this site; occasional in other Carolina bay lakes	Natural Lake Shoreline Swamp (Lake Waccamaw Subtype; Schafale 2012)
7289320	NCSC		024f44f2-a2f5-4daa-b306-c11efb5aa4d0	PreservedSpecimen	309dc6e2-800e-44b8-b0a6-c34b062789ab	NCSC00088252		Plantae	Magnoliophyta		Poales	Poaceae	Coleataenia longifolia	(Torr.) Soreng	Coleataenia	longifolia					Weakley, A.S. 2012 (working draft of 30 Nov 2012). Flora of the southern and mid-Atlantic states. Courtesy of the author, University of North Carolina, Chapel Hill.					Howell	LAWA-168	2014-10-04	2014	10	4	277			Occasional at this site; infrequent in other Carolina bay lakes	Natural Lake Shoreline Swamp (Lake Waccamaw Subtype; Schafale 2012)
7289321	NCSC		024f44f2-a2f5-4daa-b306-c11efb5aa4d0	PreservedSpecimen	3ec5174e-2a00-4bf3-a761-e7f956282d78	NCSC00088638		Plantae	Magnoliophyta		Poales	Juncaceae	Juncus canadensis	J. Gay ex Laharpe	Juncus	canadensis					Weakley, A.S. 2012 (working draft of 30 Nov 2012). Flora of the southern and mid-Atlantic states. Courtesy of the author, University of North Carolina, Chapel Hill.					Howell	LAWA-167	2014-10-04	2014	10	4	277			Infrequent at this site; absent in other Carolina bay lakes	Natural Lake Shoreline Swamp (Lake Waccamaw Subtype; Schafale 2012)
7289322	NCSC		024f44f2-a2f5-4daa-b306-c11efb5aa4d0	PreservedSpecimen	d9e6797c-03a1-4a42-97eb-996f92ac9725	NCSC00088470		Plantae	Magnoliophyta		Poales	Cyperaceae	Scirpus cyperinus	(L.) Kunth	Scirpus	cyperinus					Weakley, A.S. 2012 (working draft of 30 Nov 2012). Flora of the southern and mid-Atlantic states. Courtesy of the author, University of North Carolina, Chapel Hill.					Howell	LAWA-166	2014-10-04	2014	10	4	277			Occasional at this site; occasional in other Carolina bay lakes	Natural Lake Shoreline Swamp (Lake Waccamaw Subtype; Schafale 2012)
7289323	NCSC		024f44f2-a2f5-4daa-b306-c11efb5aa4d0	PreservedSpecimen	78e697ac-02bb-4599-aae9-10e44cf99ad8	NCSC00088415		Plantae	Magnoliophyta		Gentianales	Rubiaceae	Cephalanthus occidentalis	L.	Cephalanthus	occidentalis					Weakley, A.S. 2012 (working draft of 30 Nov 2012). Flora of the southern and mid-Atlantic states. Courtesy of the author, University of North Carolina, Chapel Hill.					Howell	LAWA-165	2014-10-04	2014	10	4	277			Occasional at this site; absent in other Carolina bay lakes	Natural Lake Shoreline Swamp (Lake Waccamaw Subtype; Schafale 2012)
7289324	NCSC		024f44f2-a2f5-4daa-b306-c11efb5aa4d0	PreservedSpecimen	7f010197-4937-46a1-a581-aaf35f90ba0f	NCSC00088253		Plantae	Magnoliophyta		Poales	Poaceae	Coleataenia longifolia	(Torr.) Soreng	Coleataenia	longifolia					Weakley, A.S. 2012 (working draft of 30 Nov 2012). Flora of the southern and mid-Atlantic states. Courtesy of the author, University of North Carolina, Chapel Hill.					Howell	LAWA-164	2014-10-04	2014	10	4	277			Occasional at this site; infrequent in other Carolina bay lakes	Natural Lake Shoreline Swamp (Lake Waccamaw Subtype; Schafale 2012)
7289325	NCSC		024f44f2-a2f5-4daa-b306-c11efb5aa4d0	PreservedSpecimen	80ca2bc2-9050-4692-8e98-f7329f5263af	NCSC00088468		Plantae	Magnoliophyta		Poales	Cyperaceae	Rhynchospora corniculata	(Lam.) A. Gray	Rhynchospora	corniculata					Weakley, A.S. 2012 (working draft of 30 Nov 2012). Flora of the southern and mid-Atlantic states. Courtesy of the author, University of North Carolina, Chapel Hill.					Howell	LAWA-163	2014-10-04	2014	10	4	277			Occasional at this site; absent in other Carolina bay lakes	Natural Lake Shoreline Swamp (Lake Waccamaw Subtype; Schafale 2012)
7289326	NCSC		024f44f2-a2f5-4daa-b306-c11efb5aa4d0	PreservedSpecimen	46dcfcf5-9cd0-4350-932a-752fadd89224	NCSC00088275		Plantae	Magnoliophyta		Liliales	Smilacaceae	Smilax walteri	Pursh	Smilax	walteri					Weakley, A.S. 2012 (working draft of 30 Nov 2012). Flora of the southern and mid-Atlantic states. Courtesy of the author, University of North Carolina, Chapel Hill.					Howell	LAWA-162	2014-10-04	2014	10	4	277			Occasional at this site; infrequent in other Carolina bay lakes	Natural Lake Shoreline Swamp (Lake Waccamaw Subtype; Schafale 2012)
7289327	NCSC		024f44f2-a2f5-4daa-b306-c11efb5aa4d0	PreservedSpecimen	1de35f26-c4c4-4774-8511-ec5b0da93d7e	NCSC00088462		Plantae	Magnoliophyta		Asterales	Asteraceae	Mikania scandens	Willd.	Mikania	scandens					Weakley, A.S. 2012 (working draft of 30 Nov 2012). Flora of the southern and mid-Atlantic states. Courtesy of the author, University of North Carolina, Chapel Hill.					Howell	LAWA-161	2014-10-04	2014	10	4	277			Rare at this site; absent in other Carolina bay lakes	Natural Lake Shoreline Swamp (Lake Waccamaw Subtype; Schafale 2012)
7289328	NCSC		024f44f2-a2f5-4daa-b306-c11efb5aa4d0	PreservedSpecimen	fb5afc01-d1b1-47c7-9006-68cfd76c7525	NCSC00088251		Plantae	Magnoliophyta		Poales	Poaceae	Saccharum giganteum	(Walter) Pers.	Saccharum	giganteum					Weakley, A.S. 2012 (working draft of 30 Nov 2012). Flora of the southern and mid-Atlantic states. Courtesy of the author, University of North Carolina, Chapel Hill.					Howell	LAWA-160	2014-10-04	2014	10	4	277			Occasional at this site; infrequent in other Carolina bay lakes	Natural Lake Shoreline Swamp (Lake Waccamaw Subtype; Schafale 2012)
7289329	NCSC		024f44f2-a2f5-4daa-b306-c11efb5aa4d0	PreservedSpecimen	880d8824-6cd6-405f-a060-47204501846a	NCSC00088464		Plantae	Magnoliophyta		Poales	Cyperaceae	Cladium mariscoides	(Muhl.) Torr.	Cladium	mariscoides					Weakley, A.S. 2012 (working draft of 30 Nov 2012). Flora of the southern and mid-Atlantic states. Courtesy of the author, University of North Carolina, Chapel Hill.					Howell			2013						Abundant at this site; absent in other Carolina bay lakes			field values redacted: eventDate, month, day, startDayOfYear, recordNumber, locality, verbatimElevation, decimalLatitude, decimalLongitude, habitat
7289330	NCSC		024f44f2-a2f5-4daa-b306-c11efb5aa4d0	PreservedSpecimen	dd46454b-9ae0-43f1-95f6-b03a384dab05	NCSC00088269		Plantae	Magnoliophyta		Commelinales	Pontederiaceae	Pontederia cordata	L.	Pontederia	cordata					Weakley, A.S. 2012 (working draft of 30 Nov 2012). Flora of the southern and mid-Atlantic states. Courtesy of the author, University of North Carolina, Chapel Hill.					Howell	LAWA-159	2014-10-04	2014	10	4	277			Occasional at this site; absent in other Carolina bay lakes	Natural Lake Shoreline Swamp (Lake Waccamaw Subtype; Schafale 2012)
7289331	NCSC		024f44f2-a2f5-4daa-b306-c11efb5aa4d0	PreservedSpecimen	442f8907-5440-446c-9b03-503ef0c603f9	NCSC00088425		Plantae	Magnoliophyta		Asterales	Asteraceae	Boltonia asteroides	Sims	Boltonia	asteroides					Weakley, A.S. 2012 (working draft of 30 Nov 2012). Flora of the southern and mid-Atlantic states. Courtesy of the author, University of North Carolina, Chapel Hill.					Howell			2014						Infrequent at this site; absent in other Carolina bay lakes			field values redacted: eventDate, month, day, startDayOfYear, recordNumber, locality, verbatimElevation, decimalLatitude, decimalLongitude, habitat
7289332	NCSC		024f44f2-a2f5-4daa-b306-c11efb5aa4d0	PreservedSpecimen	d41c9679-a873-45f9-a47f-0f04b6ca6a03	NCSC00088641		Plantae	Magnoliophyta		Lamiales	Lamiaceae	Lycopus angustifolius	Elliot	Lycopus	angustifolius					Weakley, A.S. 2012 (working draft of 30 Nov 2012). Flora of the southern and mid-Atlantic states. Courtesy of the author, University of North Carolina, Chapel Hill.					Howell			2014						Infrequent at this site; absent in other Carolina bay lakes			field values redacted: eventDate, month, day, startDayOfYear, recordNumber, locality, verbatimElevation, decimalLatitude, decimalLongitude, habitat
7289333	NCSC		024f44f2-a2f5-4daa-b306-c11efb5aa4d0	PreservedSpecimen	19c10854-eb11-4c4d-be99-03b424fe5717	NCSC00088642		Plantae	Magnoliophyta		Lamiales	Lamiaceae	Lycopus angustifolius	Elliot	Lycopus	angustifolius					Weakley, A.S. 2012 (working draft of 30 Nov 2012). Flora of the southern and mid-Atlantic states. Courtesy of the author, University of North Carolina, Chapel Hill.					Howell			2014						Infrequent at this site; absent in other Carolina bay lakes			field values redacted: eventDate, month, day, startDayOfYear, recordNumber, locality, verbatimElevation, decimalLatitude, decimalLongitude, habitat
7289334	NCSC		024f44f2-a2f5-4daa-b306-c11efb5aa4d0	PreservedSpecimen	29839b0d-8632-47b0-af71-86c3fd833f6c	NCSC00088469		Plantae	Magnoliophyta		Poales	Cyperaceae	Eleocharis equisetoides	(Elliot) Torr.	Eleocharis	equisetoides					Weakley, A.S. 2012 (working draft of 30 Nov 2012). Flora of the southern and mid-Atlantic states. Courtesy of the author, University of North Carolina, Chapel Hill.					Howell			2014						Infrequent at this site; rare in other Carolina bay lakes			field values redacted: eventDate, month, day, startDayOfYear, recordNumber, locality, verbatimElevation, decimalLatitude, decimalLongitude, habitat
7289335	NCSC		024f44f2-a2f5-4daa-b306-c11efb5aa4d0	PreservedSpecimen	8ab22814-5231-4394-98e3-c4ef5460d281	NCSC00088388		Plantae	Magnoliophyta		Gentianales	Loganiaceae	Mitreola petiolata	(J.F. Gmel.) Torr. & A. Gray	Mitreola	petiolata					Weakley, A.S. 2012 (working draft of 30 Nov 2012). Flora of the southern and mid-Atlantic states. Courtesy of the author, University of North Carolina, Chapel Hill.					Howell	LAWA-154	2014-08-30	2014	8	30	242			Infrequent at this site; absent in other Carolina bay lakes	Natural Lake Shoreline Swamp (Lake Waccamaw Subtype; Schafale 2012)
7289336	NCSC		024f44f2-a2f5-4daa-b306-c11efb5aa4d0	PreservedSpecimen	87080c1f-8a88-460a-a70a-f812ccddeede	NCSC00088455		Plantae	Magnoliophyta		Aquifoliales	Aquifoliaceae	Ilex glabra	(L.) A. Gray	Ilex	glabra					Weakley, A.S. 2012 (working draft of 30 Nov 2012). Flora of the southern and mid-Atlantic states. Courtesy of the author, University of North Carolina, Chapel Hill.					Howell	LAWA-153	2014-08-30	2014	8	30	242			Infrequent at this site; infrequent in other Carolina bay lakes	Natural Lake Shoreline Swamp (Lake Waccamaw Subtype; Schafale 2012)
7289337	NCSC		024f44f2-a2f5-4daa-b306-c11efb5aa4d0	PreservedSpecimen	e81179ff-6b43-4aa9-a77a-6b4706535eaa	NCSC00088447		Plantae	Magnoliophyta		Sapindales	Anacardiaceae	Toxicodendron radicans	(L.) Kuntze	Toxicodendron	radicans					Weakley, A.S. 2012 (working draft of 30 Nov 2012). Flora of the southern and mid-Atlantic states. Courtesy of the author, University of North Carolina, Chapel Hill.					Howell	LAWA-152	2014-08-30	2014	8	30	242			Occasional at this site; infrequent in other Carolina bay lakes	Natural Lake Shoreline Swamp (Lake Waccamaw Subtype; Schafale 2012)
7289338	NCSC		024f44f2-a2f5-4daa-b306-c11efb5aa4d0	PreservedSpecimen	ab0b5cf2-0497-4da5-908b-dcea3712d93d	NCSC00088616		Plantae	Magnoliophyta		Ericales	Ericaceae	Eubotrys racemosa	(L.) Nutt.	Eubotrys	racemosa					Weakley, A.S. 2012 (working draft of 30 Nov 2012). Flora of the southern and mid-Atlantic states. Courtesy of the author, University of North Carolina, Chapel Hill.					Howell	LAWA-151	2014-08-30	2014	8	30	242			Occasional at this site; occasional in other Carolina bay lakes	Natural Lake Shoreline Swamp (Lake Waccamaw Subtype; Schafale 2012)
7289339	NCSC		024f44f2-a2f5-4daa-b306-c11efb5aa4d0	PreservedSpecimen	020d12b9-347f-4d6e-8cc9-0e641f40760e	NCSC00088440		Plantae	Magnoliophyta		Ericales	Clethraceae	Clethra alnifolia L.								Weakley, A.S. 2012 (working draft of 30 Nov 2012). Flora of the southern and mid-Atlantic states. Courtesy of the author, University of North Carolina, Chapel Hill.					Howell	LAWA-150	2014-08-30	2014	8	30	242			Occasional at this site; occasional in other Carolina bay lakes	Natural Lake Shoreline Swamp (Lake Waccamaw Subtype; Schafale 2012)
7289340	NCSC		024f44f2-a2f5-4daa-b306-c11efb5aa4d0	PreservedSpecimen	64a8d050-ea9a-44eb-b3eb-1ab0a293974c	NCSC00088271		Plantae	Magnoliophyta		Commelinales	Pontederiaceae	Pontederia cordata	L.	Pontederia	cordata					Weakley, A.S. 2012 (working draft of 30 Nov 2012). Flora of the southern and mid-Atlantic states. Courtesy of the author, University of North Carolina, Chapel Hill.					Howell	LAWA-15	2013-09-28	2013	9	28	271			Occasional at this site; rare in other Carolina bay lakes	Natural Lake Shoreline Swamp (Lake Waccamaw Subtype; Schafale 2012)
7289341	NCSC		024f44f2-a2f5-4daa-b306-c11efb5aa4d0	PreservedSpecimen	0af67f20-fe44-4636-8472-9c073fe8ea60	NCSC00088629		Plantae	Magnoliophyta		Malpighiales	Hypericaceae	Hypericum walteri	J.G. Gmel.	Hypericum	walteri					Weakley, A.S. 2012 (working draft of 30 Nov 2012). Flora of the southern and mid-Atlantic states. Courtesy of the author, University of North Carolina, Chapel Hill.					Howell	LAWA-149	2014-08-30	2014	8	30	242			Occasional at this site; absent in other Carolina bay lakes	Natural Lake Shoreline Swamp (Lake Waccamaw Subtype; Schafale 2012)
7289342	NCSC		024f44f2-a2f5-4daa-b306-c11efb5aa4d0	PreservedSpecimen	8916932a-df86-4358-b86c-84c0a658c6d2	NCSC00088424		Plantae	Magnoliophyta		Asterales	Asteraceae	Pluchea baccharis	(Mill.) Pruski	Pluchea	baccharis					Weakley, A.S. 2012 (working draft of 30 Nov 2012). Flora of the southern and mid-Atlantic states. Courtesy of the author, University of North Carolina, Chapel Hill.					Howell	LAWA-148	2014-08-30	2014	8	30	242			Frequent at this site; absent in other Carolina bay lakes	Natural Lake Shoreline Swamp (Lake Waccamaw Subtype; Schafale 2012)
7289343	NCSC		024f44f2-a2f5-4daa-b306-c11efb5aa4d0	PreservedSpecimen	bfbba716-9b29-43ce-b491-010326be1dad	NCSC00088241		Plantae	Magnoliophyta		Poales	Poaceae	Coleataenia longifolia	(Torr.) Soreng	Coleataenia	longifolia					Weakley, A.S. 2012 (working draft of 30 Nov 2012). Flora of the southern and mid-Atlantic states. Courtesy of the author, University of North Carolina, Chapel Hill.					Howell	LAWA-147	2014-08-30	2014	8	30	242			Occasional at this site; rare in other Carolina bay lakes	Natural Lake Shoreline Swamp (Lake Waccamaw Subtype; Schafale 2012)
7289344	NCSC		024f44f2-a2f5-4daa-b306-c11efb5aa4d0	PreservedSpecimen	97b54c8d-abb5-4fa8-aa70-ca9dfb9bfeac	NCSC00088472		Plantae	Magnoliophyta		Poales	Cyperaceae	Cladium mariscoides	(Muhl.) Torr.	Cladium	mariscoides					Weakley, A.S. 2012 (working draft of 30 Nov 2012). Flora of the southern and mid-Atlantic states. Courtesy of the author, University of North Carolina, Chapel Hill.					Howell			2014						Frequent at this site; absent in other Carolina bay lakes			field values redacted: eventDate, month, day, startDayOfYear, recordNumber, locality, verbatimElevation, decimalLatitude, decimalLongitude, habitat
7289345	NCSC		024f44f2-a2f5-4daa-b306-c11efb5aa4d0	PreservedSpecimen	b64a8833-7dc9-4ce0-b269-d8349b81a442	NCSC00088240		Plantae	Magnoliophyta		Poales	Poaceae	Coleataenia longifolia	(Torr.) Soreng	Coleataenia	longifolia					Weakley, A.S. 2012 (working draft of 30 Nov 2012). Flora of the southern and mid-Atlantic states. Courtesy of the author, University of North Carolina, Chapel Hill.					Howell	LAWA-145	2014-08-30	2014	8	30	242			Occasional at this site; rare in other Carolina bay lakes	Natural Lake Shoreline Swamp (Lake Waccamaw Subtype; Schafale 2012)
7289346	NCSC		024f44f2-a2f5-4daa-b306-c11efb5aa4d0	PreservedSpecimen	4c2124f7-e04f-4658-9c51-cb731ad76538	NCSC00088282		Plantae	Magnoliophyta		Poales	Xyridaceae	Xyris smalliana	Nash	Xyris	smalliana					Weakley, A.S. 2012 (working draft of 30 Nov 2012). Flora of the southern and mid-Atlantic states. Courtesy of the author, University of North Carolina, Chapel Hill.					Howell			2014						Abundant at this site; occasional in other Carolina bay lakes			field values redacted: eventDate, month, day, startDayOfYear, recordNumber, locality, verbatimElevation, decimalLatitude, decimalLongitude, habitat
7289347	NCSC		024f44f2-a2f5-4daa-b306-c11efb5aa4d0	PreservedSpecimen	dbc8f5ec-a6ca-4367-b628-531c1e3f8af0	NCSC00088263		Plantae	Magnoliophyta		Myrtales	Onagraceae	Ludwigia sphaerocarpa	Elliot	Ludwigia	sphaerocarpa					Weakley, A.S. 2012 (working draft of 30 Nov 2012). Flora of the southern and mid-Atlantic states. Courtesy of the author, University of North Carolina, Chapel Hill.					Howell			2014						Occasional at this site; absent in other Carolina bay lakes			field values redacted: eventDate, month, day, startDayOfYear, recordNumber, locality, verbatimElevation, decimalLatitude, decimalLongitude, habitat
7289348	NCSC		024f44f2-a2f5-4daa-b306-c11efb5aa4d0	PreservedSpecimen	9386af27-a481-4edf-a8d1-af337b84df8d	NCSC00088283		Plantae	Magnoliophyta		Poales	Xyridaceae	Xyris smalliana	Nash	Xyris	smalliana					Weakley, A.S. 2012 (working draft of 30 Nov 2012). Flora of the southern and mid-Atlantic states. Courtesy of the author, University of North Carolina, Chapel Hill.					Howell			2014						Abundnt at this site; occasional in other Carolina bay lakes			field values redacted: eventDate, month, day, startDayOfYear, recordNumber, locality, verbatimElevation, decimalLatitude, decimalLongitude, habitat
7289349	NCSC		024f44f2-a2f5-4daa-b306-c11efb5aa4d0	PreservedSpecimen	4beb32be-cd2e-4d3c-a6cf-4bb43ee14bea	NCSC00088426		Plantae	Magnoliophyta		Asterales	Asteraceae	Eupatorium capillifolium	(Lam.) Small	Eupatorium	capillifolium					Weakley, A.S. 2012 (working draft of 30 Nov 2012). Flora of the southern and mid-Atlantic states. Courtesy of the author, University of North Carolina, Chapel Hill.					Howell	LAWA-141	2014-08-06	2014	8	6	218			Infrequent at this site; absent in other Carolina bay lakes	Natural Lake Shoreline Swamp (Lake Waccamaw Subtype; Schafale 2012)
7289350	NCSC		024f44f2-a2f5-4daa-b306-c11efb5aa4d0	PreservedSpecimen	13046299-cfa3-4dca-9f6e-d2a7242d7d3e	NCSC00088387		Plantae	Magnoliophyta		Gentianales	Loganiaceae	Mitreola petiolata	(J.F. Gmel.) Torr. & A. Gray	Mitreola	petiolata					Weakley, A.S. 2012 (working draft of 30 Nov 2012). Flora of the southern and mid-Atlantic states. Courtesy of the author, University of North Carolina, Chapel Hill.					Howell	LAWA-140	2014-08-06	2014	8	6	218			Infrequent at this site; absent in other Carolina bay lakes	Natural Lake Shoreline Swamp (Lake Waccamaw Subtype; Schafale 2012)
7289351	NCSC		024f44f2-a2f5-4daa-b306-c11efb5aa4d0	PreservedSpecimen	f3013cd0-0f22-482d-8a2d-16b3d3831495	NCSC00088645		Plantae	Magnoliophyta		Lamiales	Lentibulariaceae	Utricularia striata	Leconte ex Torr.	Utricularia	striata					Weakley, A.S. 2012 (working draft of 30 Nov 2012). Flora of the southern and mid-Atlantic states. Courtesy of the author, University of North Carolina, Chapel Hill.					Howell	LAWA-14	2013-09-28	2013	9	28	271			Occasional at this site; occasional in other Carolina bay lakes	Natural Lake Shoreline Swamp (Lake Waccamaw Subtype; Schafale 2012)
7289352	NCSC		024f44f2-a2f5-4daa-b306-c11efb5aa4d0	PreservedSpecimen	24c31c5e-b619-477e-a644-48a4efb964c4	NCSC00088631		Plantae	Magnoliophyta		Malpighiales	Hypericaceae	Hypericum mutilum	L.	Hypericum	mutilum					Weakley, A.S. 2012 (working draft of 30 Nov 2012). Flora of the southern and mid-Atlantic states. Courtesy of the author, University of North Carolina, Chapel Hill.					Howell	LAWA-139	2014-08-06	2014	8	6	218			Rare at this site; absent in other Carolina bay lakes	Natural Lake Shoreline Swamp (Lake Waccamaw Subtype; Schafale 2012)
7289353	NCSC		024f44f2-a2f5-4daa-b306-c11efb5aa4d0	PreservedSpecimen	ee096171-9bf0-430d-a74f-9bae903f8e14	NCSC00088416		Plantae	Magnoliophyta		Gentianales	Rubiaceae	Galium obtusum	Bigelow	Galium	obtusum					Weakley, A.S. 2012 (working draft of 30 Nov 2012). Flora of the southern and mid-Atlantic states. Courtesy of the author, University of North Carolina, Chapel Hill.					Howell	LAWA-138	2014-08-06	2014	8	6	218			Rare at this site; absent in other Carolina bay lakes	Natural Lake Shoreline Swamp (Lake Waccamaw Subtype; Schafale 2012)
7289354	NCSC		024f44f2-a2f5-4daa-b306-c11efb5aa4d0	PreservedSpecimen	ffe3c97b-db48-4dcc-b09b-3c5d03636df8	NCSC00088280		Plantae	Magnoliophyta		Vitales	Vitaceae	Muscadinia rotundifolia	(Michx.) Small	Muscadinia	rotundifolia					Weakley, A.S. 2012 (working draft of 30 Nov 2012). Flora of the southern and mid-Atlantic states. Courtesy of the author, University of North Carolina, Chapel Hill.					Howell	LAWA-137	2014-08-06	2014	8	6	218			Occasional at this site; occasional in other Carolina bay lakes	Natural Lake Shoreline Swamp (Lake Waccamaw Subtype; Schafale 2012)
7289355	NCSC		024f44f2-a2f5-4daa-b306-c11efb5aa4d0	PreservedSpecimen	86b86074-7ce6-443f-9d98-936aeed3274d	NCSC00088473		Plantae	Magnoliophyta		Poales	Cyperaceae	Carex lupulina	Muhl. ex Willd.	Carex	lupulina					Weakley, A.S. 2012 (working draft of 30 Nov 2012). Flora of the southern and mid-Atlantic states. Courtesy of the author, University of North Carolina, Chapel Hill.					Howell	LAWA-136	2014-08-06	2014	8	6	218			Rare at this site; absent in other Carolina bay lakes	Natural Lake Shoreline Swamp (Lake Waccamaw Subtype; Schafale 2012)
7289356	NCSC		024f44f2-a2f5-4daa-b306-c11efb5aa4d0	PreservedSpecimen	a9950ca2-d954-42d9-8551-18646e166a2e	NCSC00088471		Plantae	Magnoliophyta		Poales	Cyperaceae	Rhynchospora corniculata	(Lam.) A. Gray	Rhynchospora	corniculata					Weakley, A.S. 2012 (working draft of 30 Nov 2012). Flora of the southern and mid-Atlantic states. Courtesy of the author, University of North Carolina, Chapel Hill.					Howell	LAWA-135	2014-08-06	2014	8	6	218			Occasional at this site; absent in other Carolina bay lakes	Natural Lake Shoreline Swamp (Lake Waccamaw Subtype; Schafale 2012)
7289357	NCSC		024f44f2-a2f5-4daa-b306-c11efb5aa4d0	PreservedSpecimen	7f274e7d-e0e7-41c3-bfa8-8bfc0e093af2	NCSC00088630		Plantae	Magnoliophyta		Malpighiales	Hypericaceae	Hypericum walteri	J.G. Gmel.	Hypericum	walteri					Weakley, A.S. 2012 (working draft of 30 Nov 2012). Flora of the southern and mid-Atlantic states. Courtesy of the author, University of North Carolina, Chapel Hill.					Howell	LAWA-134	2014-08-06	2014	8	6	218			Occasional at this site; absent in other Carolina bay lakes	Natural Lake Shoreline Swamp (Lake Waccamaw Subtype; Schafale 2012)
7289358	NCSC		024f44f2-a2f5-4daa-b306-c11efb5aa4d0	PreservedSpecimen	563d66f3-4a69-4327-a543-1a932f5e389f	NCSC00088444		Plantae	Magnoliophyta		Saxifragales	Altingiaceae	Liquidambar styraciflua	L.	Liquidambar	styraciflua					Weakley, A.S. 2012 (working draft of 30 Nov 2012). Flora of the southern and mid-Atlantic states. Courtesy of the author, University of North Carolina, Chapel Hill.					Howell	LAWA-133	2014-08-06	2014	8	6	218			Occasional at this site; infrequent in other Carolina bay lakes	Natural Lake Shoreline Swamp (Lake Waccamaw Subtype; Schafale 2012)
7289359	NCSC		024f44f2-a2f5-4daa-b306-c11efb5aa4d0	PreservedSpecimen	14a68f84-f388-4104-98ca-e382d2d56f80	NCSC00088441		Plantae	Magnoliophyta		Ericales	Clethraceae	Clethra alnifolia	L.	Clethra	alnifolia					Weakley, A.S. 2012 (working draft of 30 Nov 2012). Flora of the southern and mid-Atlantic states. Courtesy of the author, University of North Carolina, Chapel Hill.					Howell	LAWA-132	2014-08-06	2014	8	6	218			Occasional at this site; occasional in other Carolina bay lakes	Natural Lake Shoreline Swamp (Lake Waccamaw Subtype; Schafale 2012)
7289360	NCSC		024f44f2-a2f5-4daa-b306-c11efb5aa4d0	PreservedSpecimen	2c18245b-070e-40cc-a5c5-468c5d99080c	NCSC00088250		Plantae	Magnoliophyta		Poales	Poaceae	Sacciolepis striata	(L.) Nash	Sacciolepis	striata					Weakley, A.S. 2012 (working draft of 30 Nov 2012). Flora of the southern and mid-Atlantic states. Courtesy of the author, University of North Carolina, Chapel Hill.					Howell	LAWA-131	2014-07-15	2014	7	15	196			Occasional at this site; occasional in other Carolina bay lakes	Natural Lake Shoreline Swamp (Lake Waccamaw Subtype; Schafale 2012)
7289361	NCSC		024f44f2-a2f5-4daa-b306-c11efb5aa4d0	PreservedSpecimen	787649cf-2a6a-4099-a43e-7c79549d4a9b	NCSC00088475		Plantae	Magnoliophyta		Poales	Cyperaceae	Rhynchospora macrostachya	Torr. ex A. Gray	Rhynchospora	macrostachya					Weakley, A.S. 2012 (working draft of 30 Nov 2012). Flora of the southern and mid-Atlantic states. Courtesy of the author, University of North Carolina, Chapel Hill.					Howell	LAWA-130	2014-07-15	2014	7	15	196			Infrequent at this site; absent in other Carolina bay lakes	Natural Lake Shoreline Swamp (Lake Waccamaw Subtype; Schafale 2012)
7289362	NCSC		024f44f2-a2f5-4daa-b306-c11efb5aa4d0	PreservedSpecimen	ba7dee9e-bc5e-4404-a582-5025d3bdb2f7	NCSC00088443		Plantae	Coniferophyta		Pinales	Cupressaceae	Taxodium ascendens	Brongn.	Taxodium	ascendens					Weakley, A.S. 2012 (working draft of 30 Nov 2012). Flora of the southern and mid-Atlantic states. Courtesy of the author, University of North Carolina, Chapel Hill.					Howell	LAWA-13	2013-09-28	2013	9	28	271			Abundant at this site; abundant in other Carolina bay lakes	Natural Lake Shoreline Swamp (Lake Waccamaw Subtype; Schafale 2012)
7289363	NCSC		024f44f2-a2f5-4daa-b306-c11efb5aa4d0	PreservedSpecimen	afe5dc01-863a-4c97-9086-bc7ed7f6fb33	NCSC00088392		Plantae	Magnoliophyta		Myrtales	Melastomataceae	Rhexia cubensis	Griseb.	Rhexia	cubensis					Weakley, A.S. 2012 (working draft of 30 Nov 2012). Flora of the southern and mid-Atlantic states. Courtesy of the author, University of North Carolina, Chapel Hill.					Howell			2014						Occasional at this site; absent in other Carolina bay lakes			field values redacted: eventDate, month, day, startDayOfYear, recordNumber, locality, verbatimElevation, decimalLatitude, decimalLongitude, habitat
7289364	NCSC		024f44f2-a2f5-4daa-b306-c11efb5aa4d0	PreservedSpecimen	985db6c1-8513-4ac2-afc2-f0b70e905712	NCSC00088245		Plantae	Magnoliophyta		Fabales	Polygalaceae	Polygala lutea	L.	Polygala	lutea					Weakley, A.S. 2012 (working draft of 30 Nov 2012). Flora of the southern and mid-Atlantic states. Courtesy of the author, University of North Carolina, Chapel Hill.					Howell	LAWA-128	2014-07-15	2014	7	15	196			Rare at this site; rare in other Carolina bay lakes	Natural Lake Shoreline Swamp (Lake Waccamaw Subtype; Schafale 2012)
7289365	NCSC		024f44f2-a2f5-4daa-b306-c11efb5aa4d0	PreservedSpecimen	99569bb8-ac3a-4887-b1fa-4c925bfcdea3	NCSC00088249		Plantae	Magnoliophyta		Poales	Poaceae	Dichanthelium erectifolium	(Nash) Gould & C.A. Clark	Dichanthelium	erectifolium					Weakley, A.S. 2012 (working draft of 30 Nov 2012). Flora of the southern and mid-Atlantic states. Courtesy of the author, University of North Carolina, Chapel Hill.					Howell			2014						Infrequent at this site; absent in other Carolina bay lakes			field values redacted: eventDate, month, day, startDayOfYear, recordNumber, locality, verbatimElevation, decimalLatitude, decimalLongitude, habitat
7289366	NCSC		024f44f2-a2f5-4daa-b306-c11efb5aa4d0	PreservedSpecimen	f635f537-d99a-4acd-a548-67de5e915cc5	NCSC00088393		Plantae	Magnoliophyta		Myrtales	Melastomataceae	Rhexia cubensis	Griseb.	Rhexia	cubensis					Weakley, A.S. 2012 (working draft of 30 Nov 2012). Flora of the southern and mid-Atlantic states. Courtesy of the author, University of North Carolina, Chapel Hill.					Howell			2014						Occasional at this site; absent in other Carolina bay lakes			field values redacted: eventDate, month, day, startDayOfYear, recordNumber, locality, verbatimElevation, decimalLatitude, decimalLongitude, habitat
7289367	NCSC		024f44f2-a2f5-4daa-b306-c11efb5aa4d0	PreservedSpecimen	2c178a77-c8bc-41ce-8a80-94d9ac775f8d	NCSC00088284		Plantae	Magnoliophyta		Poales	Xyridaceae	Xyris smalliana	Nash	Xyris	smalliana					Weakley, A.S. 2012 (working draft of 30 Nov 2012). Flora of the southern and mid-Atlantic states. Courtesy of the author, University of North Carolina, Chapel Hill.					Howell			2014						Abundnt at this site; occasional in other Carolina bay lakes			field values redacted: eventDate, month, day, startDayOfYear, recordNumber, locality, verbatimElevation, decimalLatitude, decimalLongitude, habitat
7289368	NCSC		024f44f2-a2f5-4daa-b306-c11efb5aa4d0	PreservedSpecimen	ac961c9c-8af3-4268-83a1-262e49a89786	NCSC00088427		Plantae	Magnoliophyta		Asterales	Asteraceae	Eupatorium capillifolium	(Lam.) Small	Eupatorium	capillifolium					Weakley, A.S. 2012 (working draft of 30 Nov 2012). Flora of the southern and mid-Atlantic states. Courtesy of the author, University of North Carolina, Chapel Hill.					Howell	LAWA-124	2014-07-15	2014	7	15	196			Infrequent at this site; absent in other Carolina bay lakes	Natural Lake Shoreline Swamp (Lake Waccamaw Subtype; Schafale 2012)
7289369	NCSC		024f44f2-a2f5-4daa-b306-c11efb5aa4d0	PreservedSpecimen	6db41754-2b9d-4839-ad1f-692cf2134bac	NCSC00088647		Plantae	Magnoliophyta		Lamiales	Lentibulariaceae	Utricularia resupinata	B.D. Greene ex Bigelow	Utricularia	resupinata					Weakley, A.S. 2012 (working draft of 30 Nov 2012). Flora of the southern and mid-Atlantic states. Courtesy of the author, University of North Carolina, Chapel Hill.					Howell			2014						Rare at this site; absent in other Carolina bay lakes			field values redacted: eventDate, month, day, startDayOfYear, recordNumber, locality, verbatimElevation, decimalLatitude, decimalLongitude, habitat
7289370	NCSC		024f44f2-a2f5-4daa-b306-c11efb5aa4d0	PreservedSpecimen	db9393a5-8712-4757-92e2-cd5f68f06447	NCSC00088648		Plantae	Magnoliophyta		Lamiales	Lentibulariaceae	Utricularia striata	Leconte ex Torr.	Utricularia	striata					Weakley, A.S. 2012 (working draft of 30 Nov 2012). Flora of the southern and mid-Atlantic states. Courtesy of the author, University of North Carolina, Chapel Hill.					Howell	LAWA-122	2014-07-01	2014	7	1	182			Occasional at this site; occasional in other Carolina bay lakes	Natural Lake Shoreline Swamp (Lake Waccamaw Subtype; Schafale 2012)
7289371	NCSC		024f44f2-a2f5-4daa-b306-c11efb5aa4d0	PreservedSpecimen	e0e323eb-1825-4f2d-980b-1a1cb0ae630d	NCSC00088452		Plantae	Magnoliophyta		Apiales	Apiaceae	Cicuta maculata	L.	Cicuta	maculata					Weakley, A.S. 2012 (working draft of 30 Nov 2012). Flora of the southern and mid-Atlantic states. Courtesy of the author, University of North Carolina, Chapel Hill.					Howell	LAWA-121	2014-07-01	2014	7	1	182			Rare at this site; absent in other Carolina bay lakes	Natural Lake Shoreline Swamp (Lake Waccamaw Subtype; Schafale 2012)
7289372	NCSC		024f44f2-a2f5-4daa-b306-c11efb5aa4d0	PreservedSpecimen	00a7fd86-7b36-4f01-83b4-929ce1616237	NCSC00088256		Plantae	Magnoliophyta		Lamiales	Plantaginaceae	Bacopa caroliniana	(Walter) B.L. Rob.	Bacopa	caroliniana					Weakley, A.S. 2012 (working draft of 30 Nov 2012). Flora of the southern and mid-Atlantic states. Courtesy of the author, University of North Carolina, Chapel Hill.					Howell			2014						Rare at this site; absent in other Carolina bay lakes			field values redacted: eventDate, month, day, startDayOfYear, recordNumber, locality, verbatimElevation, decimalLatitude, decimalLongitude, habitat
7289373	NCSC		024f44f2-a2f5-4daa-b306-c11efb5aa4d0	PreservedSpecimen	7e876f47-af92-4be3-9849-91bfdf947dcb	NCSC00088423		Plantae	Magnoliophyta		Asterales	Asteraceae	Euthamia caroliniana	(L.) Greene ex Porter & Britton	Euthamia	caroliniana					Weakley, A.S. 2012 (working draft of 30 Nov 2012). Flora of the southern and mid-Atlantic states. Courtesy of the author, University of North Carolina, Chapel Hill.					Howell	LAWA-12	2013-09-28	2013	9	28	271			Rare at this site; absent in other Carolina bay lakes	Natural Lake Shoreline Swamp (Lake Waccamaw Subtype; Schafale 2012)
7289374	NCSC		024f44f2-a2f5-4daa-b306-c11efb5aa4d0	PreservedSpecimen	f84ab743-0bf5-4848-8bdc-e25213a42d9a	NCSC00088414		Plantae	Magnoliophyta		Gentianales	Rubiaceae	Cephalanthus occidentalis	L.	Cephalanthus	occidentalis					Weakley, A.S. 2012 (working draft of 30 Nov 2012). Flora of the southern and mid-Atlantic states. Courtesy of the author, University of North Carolina, Chapel Hill.					Howell	LAWA-119	2014-07-01	2014	7	1	182			Occasional at this site; absent in other Carolina bay lakes	Natural Lake Shoreline Swamp (Lake Waccamaw Subtype; Schafale 2012)
7289375	NCSC		024f44f2-a2f5-4daa-b306-c11efb5aa4d0	PreservedSpecimen	e413670b-a13a-49b2-becf-6611ce636b81	NCSC00088262		Plantae	Magnoliophyta		Myrtales	Onagraceae	Ludwigia brevipes	(B.H. Long ex Britton, A. Braun & Small) Eames	Ludwigia	brevipes					Weakley, A.S. 2012 (working draft of 30 Nov 2012). Flora of the southern and mid-Atlantic states. Courtesy of the author, University of North Carolina, Chapel Hill.					Howell			2014						Infrequent at this site; absent in other Carolina bay lakes			field values redacted: eventDate, month, day, startDayOfYear, recordNumber, locality, verbatimElevation, decimalLatitude, decimalLongitude, habitat
7289376	NCSC		024f44f2-a2f5-4daa-b306-c11efb5aa4d0	PreservedSpecimen	4b7c06cd-a0ea-419f-aa47-953440f7651e	NCSC00088624		Plantae	Magnoliophyta		Fabales	Fabaceae	Wisteria frutescens	(L.) Poir.	Wisteria	frutescens					Weakley, A.S. 2012 (working draft of 30 Nov 2012). Flora of the southern and mid-Atlantic states. Courtesy of the author, University of North Carolina, Chapel Hill.					Howell	LAWA-117	2014-07-01	2014	7	1	182			Occasional at this site; infrequent in other Carolina bay lakes	Natural Lake Shoreline Swamp (Lake Waccamaw Subtype; Schafale 2012)
7289377	NCSC		024f44f2-a2f5-4daa-b306-c11efb5aa4d0	PreservedSpecimen	496e3bbb-ca19-472d-b00b-867899229a9b	NCSC00088260		Plantae	Magnoliophyta		Asparagales	Orchidaceae	Spiranthes laciniata	(Small) Ames	Spiranthes	laciniata					Weakley, A.S. 2012 (working draft of 30 Nov 2012). Flora of the southern and mid-Atlantic states. Courtesy of the author, University of North Carolina, Chapel Hill.					Howell			2014						Occasional at this site; absent in other Carolina bay lakes			field values redacted: eventDate, month, day, startDayOfYear, recordNumber, locality, verbatimElevation, decimalLatitude, decimalLongitude, habitat
7289378	NCSC		024f44f2-a2f5-4daa-b306-c11efb5aa4d0	PreservedSpecimen	35a08e03-a2d9-4380-a53e-2a8ee7fd54a6	NCSC00088453		Plantae	Magnoliophyta		Apiales	Apiaceae	Centella asiatica	(L.) Urban	Centella	asiatica					Weakley, A.S. 2012 (working draft of 30 Nov 2012). Flora of the southern and mid-Atlantic states. Courtesy of the author, University of North Carolina, Chapel Hill.					Howell	LAWA-115	2014-07-01	2014	7	1	182			Frequent at this site; absent in other Carolina bay lakes	Natural Lake Shoreline Swamp (Lake Waccamaw Subtype; Schafale 2012)
7289379	NCSC		024f44f2-a2f5-4daa-b306-c11efb5aa4d0	PreservedSpecimen	ed17734c-97ce-478b-a64b-52ca1ec3ccaa	NCSC00088281		Plantae	Magnoliophyta		Poales	Xyridaceae	Xyris smalliana	Nash	Xyris	smalliana					Weakley, A.S. 2012 (working draft of 30 Nov 2012). Flora of the southern and mid-Atlantic states. Courtesy of the author, University of North Carolina, Chapel Hill.					Howell			2014						Abundant at this site; occasional in other Carolina bay lakes			field values redacted: eventDate, month, day, startDayOfYear, recordNumber, locality, verbatimElevation, decimalLatitude, decimalLongitude, habitat
7289380	NCSC		024f44f2-a2f5-4daa-b306-c11efb5aa4d0	PreservedSpecimen	546b232a-0ac1-4b01-af31-b64a64e3d941	NCSC00088391		Plantae	Magnoliophyta		Myrtales	Melastomataceae	Rhexia cubensis	Griseb.	Rhexia	cubensis					Weakley, A.S. 2012 (working draft of 30 Nov 2012). Flora of the southern and mid-Atlantic states. Courtesy of the author, University of North Carolina, Chapel Hill.					Howell			2014						Occasional at this site; absent in other Carolina bay lakes			field values redacted: eventDate, month, day, startDayOfYear, recordNumber, locality, verbatimElevation, decimalLatitude, decimalLongitude, habitat
7289381	NCSC		024f44f2-a2f5-4daa-b306-c11efb5aa4d0	PreservedSpecimen	52d9f8ea-bcd4-4fa1-8bca-74bb31130d60	NCSC00088410		Plantae	Magnoliophyta		Rosales	Rosaceae	Rosa palustris	Marsh.	Rosa	palustris					Weakley, A.S. 2012 (working draft of 30 Nov 2012). Flora of the southern and mid-Atlantic states. Courtesy of the author, University of North Carolina, Chapel Hill.					Howell	LAWA-112	2014-07-01	2014	7	1	182			Infrequent at this site; rare in other Carolina bay lakes	Natural Lake Shoreline Swamp (Lake Waccamaw Subtype; Schafale 2012)
7289382	NCSC		024f44f2-a2f5-4daa-b306-c11efb5aa4d0	PreservedSpecimen	eb2b94b1-4e9d-4a28-b292-8c8b672b41a8	NCSC00088254		Plantae	Magnoliophyta		Poales	Poaceae	Dichanthelium erectifolium	(Nash) Gould & C.A. Clark	Dichanthelium	erectifolium					Weakley, A.S. 2012 (working draft of 30 Nov 2012). Flora of the southern and mid-Atlantic states. Courtesy of the author, University of North Carolina, Chapel Hill.					Howell			2014						Infrequent at this site; absent in other Carolina bay lakes			field values redacted: eventDate, month, day, startDayOfYear, recordNumber, locality, verbatimElevation, decimalLatitude, decimalLongitude, habitat
7289383	NCSC		024f44f2-a2f5-4daa-b306-c11efb5aa4d0	PreservedSpecimen	425f8975-7988-420e-a45e-2a21e5b618f3	NCSC00088389		Plantae	Lycopodiophyta		Lycopodiales	Lycopodiaceae	Lycopodiella appressa	(Chapm.) Cranfill	Lycopodiella	appressa					Weakley, A.S. 2012 (working draft of 30 Nov 2012). Flora of the southern and mid-Atlantic states. Courtesy of the author, University of North Carolina, Chapel Hill.					Howell	LAWA-110	2014-07-01	2014	7	1	182			Infrequent at this site; infrequent in other Carolina bay lakes	Natural Lake Shoreline Swamp (Lake Waccamaw Subtype; Schafale 2012)
7289384	NCSC		024f44f2-a2f5-4daa-b306-c11efb5aa4d0	PreservedSpecimen	46962764-dc2f-44d0-873f-cb693f348bf5	NCSC00088432		Plantae	Magnoliophyta		Fagales	Betulaceae	Alnus serulata	(Aiton) Willd.							Weakley, A.S. 2012 (working draft of 30 Nov 2012). Flora of the southern and mid-Atlantic states. Courtesy of the author, University of North Carolina, Chapel Hill.					Howell	LAWA-11	2013-09-28	2013	9	28	271			Occasional at this site; absent in other Carolina bay lakes	Natural Lake Shoreline Swamp (Lake Waccamaw Subtype; Schafale 2012)
7289385	NCSC		024f44f2-a2f5-4daa-b306-c11efb5aa4d0	PreservedSpecimen	ea213bc1-646a-4a12-abf9-38b8bd12dadc	NCSC00088646		Plantae	Magnoliophyta		Lamiales	Lentibulariaceae	Utricularia cornuta	Michx.	Utricularia	cornuta					Weakley, A.S. 2012 (working draft of 30 Nov 2012). Flora of the southern and mid-Atlantic states. Courtesy of the author, University of North Carolina, Chapel Hill.					Howell			2014						Rare at this site; absent in other Carolina bay lakes			field values redacted: eventDate, month, day, startDayOfYear, recordNumber, locality, verbatimElevation, decimalLatitude, decimalLongitude, habitat
7289386	NCSC		024f44f2-a2f5-4daa-b306-c11efb5aa4d0	PreservedSpecimen	b3e1d3ba-398b-49f7-adca-582fe9f01f06	NCSC00088463		Plantae	Magnoliophyta		Asterales	Asteraceae	Sclerolepis uniflora	(Walter) Britton, Sterns & Poggenb.	Sclerolepis	uniflora					Weakley, A.S. 2012 (working draft of 30 Nov 2012). Flora of the southern and mid-Atlantic states. Courtesy of the author, University of North Carolina, Chapel Hill.					Howell			2014						Frequent at this site; absent in other Carolina bay lakes			field values redacted: eventDate, month, day, startDayOfYear, recordNumber, locality, verbatimElevation, decimalLatitude, decimalLongitude, habitat
7289387	NCSC		024f44f2-a2f5-4daa-b306-c11efb5aa4d0	PreservedSpecimen	048eea5c-875e-4dac-b734-caee33813548	NCSC00088626		Plantae	Magnoliophyta		Commelinales	Haemodoraceae	Lachnanthes caroliniana	(Lam.) Dandy	Lachnanthes	caroliniana					Weakley, A.S. 2012 (working draft of 30 Nov 2012). Flora of the southern and mid-Atlantic states. Courtesy of the author, University of North Carolina, Chapel Hill.					Howell	LAWA-107	2014-07-01	2014	7	1	182			Occasional at this site; occasional in other Carolina bay lakes	Natural Lake Shoreline Swamp (Lake Waccamaw Subtype; Schafale 2012)
7289388	NCSC		024f44f2-a2f5-4daa-b306-c11efb5aa4d0	PreservedSpecimen	608b10cb-4992-47b8-a29e-05546e38d943	NCSC00088261		Plantae	Magnoliophyta		Asparagales	Orchidaceae	Spiranthes laciniata	(Small) Ames	Spiranthes	laciniata					Weakley, A.S. 2012 (working draft of 30 Nov 2012). Flora of the southern and mid-Atlantic states. Courtesy of the author, University of North Carolina, Chapel Hill.					Howell			2014						Occasional at this site; absent in other Carolina bay lakes			field values redacted: eventDate, month, day, startDayOfYear, recordNumber, locality, verbatimElevation, decimalLatitude, decimalLongitude, habitat
7289389	NCSC		024f44f2-a2f5-4daa-b306-c11efb5aa4d0	PreservedSpecimen	068af3eb-20f1-4017-bb51-50c2f84ad037	NCSC00088259		Plantae	Magnoliophyta		Asparagales	Orchidaceae	Spiranthes laciniata	(Small) Ames	Spiranthes	laciniata					Weakley, A.S. 2012 (working draft of 30 Nov 2012). Flora of the southern and mid-Atlantic states. Courtesy of the author, University of North Carolina, Chapel Hill.					Howell			2014						Occasional at this site; absent in other Carolina bay lakes			field values redacted: eventDate, month, day, startDayOfYear, recordNumber, locality, verbatimElevation, decimalLatitude, decimalLongitude, habitat
7289390	NCSC		024f44f2-a2f5-4daa-b306-c11efb5aa4d0	PreservedSpecimen	78322846-cb7c-441c-bdb8-f75e7fea9217	NCSC00088413		Plantae	Magnoliophyta		Gentianales	Rubiaceae	Cephalanthus occidentalis	L.	Cephalanthus	occidentalis					Weakley, A.S. 2012 (working draft of 30 Nov 2012). Flora of the southern and mid-Atlantic states. Courtesy of the author, University of North Carolina, Chapel Hill.					Howell	LAWA-104	2014-06-24	2014	6	24	175			Occasional at this site; absent in other Carolina bay lakes	Natural Lake Shoreline Swamp (Lake Waccamaw Subtype; Schafale 2012)
7289391	NCSC		024f44f2-a2f5-4daa-b306-c11efb5aa4d0	PreservedSpecimen	151b8513-88fb-4354-a449-6e52fe41f1bc	NCSC00088461		Plantae	Magnoliophyta		Asterales	Asteraceae	Sclerolepis uniflora	(Walter) Britton, Sterns & Poggenb.	Sclerolepis	uniflora					Weakley, A.S. 2012 (working draft of 30 Nov 2012). Flora of the southern and mid-Atlantic states. Courtesy of the author, University of North Carolina, Chapel Hill.					Howell			2014						Frequent at this site; absent in other Carolina bay lakes			field values redacted: eventDate, month, day, startDayOfYear, recordNumber, locality, verbatimElevation, decimalLatitude, decimalLongitude, habitat
7289392	NCSC		024f44f2-a2f5-4daa-b306-c11efb5aa4d0	PreservedSpecimen	7b69150b-c357-4bdc-8949-23f84dd4a4e5	NCSC00088264		Plantae	Magnoliophyta		Myrtales	Onagraceae	Ludwigia brevipes	(B.H. Long ex Britton, A. Braun & Small) Eames	Ludwigia	brevipes					Weakley, A.S. 2012 (working draft of 30 Nov 2012). Flora of the southern and mid-Atlantic states. Courtesy of the author, University of North Carolina, Chapel Hill.					Howell			2014						Infrequent at this site; absent in other Carolina bay lakes			field values redacted: eventDate, month, day, startDayOfYear, recordNumber, locality, verbatimElevation, decimalLatitude, decimalLongitude, habitat
7289393	NCSC		024f44f2-a2f5-4daa-b306-c11efb5aa4d0	PreservedSpecimen	00e72afe-d9fb-4a91-b0f5-d825a03fc17c	NCSC00088421		Plantae	Magnoliophyta		Asterales	Asteraceae	Pluchea baccharis	(Mill.) Pruski	Pluchea	baccharis					Weakley, A.S. 2012 (working draft of 30 Nov 2012). Flora of the southern and mid-Atlantic states. Courtesy of the author, University of North Carolina, Chapel Hill.					Howell	LAWA-101	2014-06-24	2014	6	24	175			Frequent at this site; absent in other Carolina bay lakes	Natural Lake Shoreline Swamp (Lake Waccamaw Subtype; Schafale 2012)
7289394	NCSC		024f44f2-a2f5-4daa-b306-c11efb5aa4d0	PreservedSpecimen	51fab35b-4f42-4f52-b43a-9926997803ab	NCSC00088477		Plantae	Magnoliophyta		Ericales	Cyrillaceae	Cyrilla racemiflora	L.	Cyrilla	racemiflora					Weakley, A.S. 2012 (working draft of 30 Nov 2012). Flora of the southern and mid-Atlantic states. Courtesy of the author, University of North Carolina, Chapel Hill.					Howell	LAWA-100	2014-06-24	2014	6	24	175			Frequent at this site; frequent in other Carolina bay lakes	Natural Lake Shoreline Swamp (Lake Waccamaw Subtype; Schafale 2012)
7289395	NCSC		024f44f2-a2f5-4daa-b306-c11efb5aa4d0	PreservedSpecimen	7cca4032-e4e7-4a64-940e-8ce27fb3f9a3	NCSC00088406		Plantae	Magnoliophyta		Cornales	Nyssaceae	Nyssa biflora	Walter	Nyssa	biflora					Weakley, A.S. 2012 (working draft of 30 Nov 2012). Flora of the southern and mid-Atlantic states. Courtesy of the author, University of North Carolina, Chapel Hill.					Howell	LAWA-10	2013-09-28	2013	9	28	271			Occasional at this site; occasional in other Carolina bay lakes	Natural Lake Shoreline Swamp (Lake Waccamaw Subtype; Schafale 2012)
7289396	NCSC		024f44f2-a2f5-4daa-b306-c11efb5aa4d0	PreservedSpecimen	e90bdd2f-7f7a-4be7-befb-a381d0e1d89d	NCSC00088459		Plantae	Magnoliophyta		Asterales	Asteraceae	Boltonia asteroides	Sims	Boltonia	asteroides					Weakley, A.S. 2012 (working draft of 30 Nov 2012). Flora of the southern and mid-Atlantic states. Courtesy of the author, University of North Carolina, Chapel Hill.					Howell			2013						Infrequent at this site; absent in other Carolina bay lakes			field values redacted: eventDate, month, day, startDayOfYear, recordNumber, locality, verbatimElevation, decimalLatitude, decimalLongitude, habitat
7289397	NCSC		024f44f2-a2f5-4daa-b306-c11efb5aa4d0	PreservedSpecimen	e38ff4d5-cfe4-4f4a-9b32-a52a1f10740f	NCSC00088788		Plantae	Magnoliophyta		Sapindales	Sapindaceae	Acer rubrum	Wats.	Acer	rubrum					Weakley, A.S. 2012 (working draft of 30 Nov 2012). Flora of the southern and mid-Atlantic states. Courtesy of the author, University of North Carolina, Chapel Hill.					Howell	JOLA-9	2014-03-11	2014	3	11	70			Occassional at this site; occasional in Carolina bay lakes	Natural Lake Shoreline Swamp (Cypress Subtype; Schafale 2012)
7289398	NCSC		024f44f2-a2f5-4daa-b306-c11efb5aa4d0	PreservedSpecimen	9782776d-e90b-4d43-be0c-61192841fba4	NCSC00088777		Plantae	Magnoliophyta		Magnoliales	Magnoliaceae	Magnolia virginiana	L.	Magnolia	virginiana					Weakley, A.S. 2012 (working draft of 30 Nov 2012). Flora of the southern and mid-Atlantic states. Courtesy of the author, University of North Carolina, Chapel Hill.					Howell	JOLA-8	2014-03-11	2014	3	11	70			Occassional at this site; occasional in Carolina bay lakes	Natural Lake Shoreline Swamp (Cypress Subtype; Schafale 2012)
7289399	NCSC		024f44f2-a2f5-4daa-b306-c11efb5aa4d0	PreservedSpecimen	565add38-bd4c-407a-9641-19ef5a2edd31	NCSC00088790		Plantae	Magnoliophyta		Liliales	Smilacaceae	Smilax laurifolia	L.	Smilax	laurifolia					Weakley, A.S. 2012 (working draft of 30 Nov 2012). Flora of the southern and mid-Atlantic states. Courtesy of the author, University of North Carolina, Chapel Hill.					Howell	JOLA-7	2014-03-11	2014	3	11	70			Frequent at this site; frequent in Carolina bay lakes	Natural Lake Shoreline Swamp (Cypress Subtype; Schafale 2012)
7289400	NCSC		024f44f2-a2f5-4daa-b306-c11efb5aa4d0	PreservedSpecimen	ebb0bc19-7a6c-4dac-a370-5fcef4b937c7	NCSC00088779		Plantae	Magnoliophyta		Laurales	Lauraceae	Persea palustris	(Raf.) Sarg.	Persea	palustris					Weakley, A.S. 2012 (working draft of 30 Nov 2012). Flora of the southern and mid-Atlantic states. Courtesy of the author, University of North Carolina, Chapel Hill.					Howell	JOLA-6	2014-03-11	2014	3	11	70			Occasional at this site; Occasional in Carolina bay lakes	Natural Lake Shoreline Swamp (Cypress Subtype; Schafale 2012)
7289401	NCSC		024f44f2-a2f5-4daa-b306-c11efb5aa4d0	PreservedSpecimen	26c2a549-8e30-4fec-8259-1a2e51d19772	NCSC00088769		Plantae	Magnoliophyta		Ericales	Clethraceae	Clethra alnifolia	L.	Clethra	alnifolia					Weakley, A.S. 2012 (working draft of 30 Nov 2012). Flora of the southern and mid-Atlantic states. Courtesy of the author, University of North Carolina, Chapel Hill.					Howell	JOLA-5	2014-03-11	2014	3	11	70			Occassional at this site; occasional in Carolina bay lakes	Natural Lake Shoreline Swamp (Cypress Subtype; Schafale 2012)
7289402	NCSC		024f44f2-a2f5-4daa-b306-c11efb5aa4d0	PreservedSpecimen	32e264c5-ace4-423f-9bf7-1178befc99e7	NCSC00088764		Plantae	Magnoliophyta		Poales	Xyridaceae	Xyris smalliana	Nash	Xyris	smalliana					Weakley, A.S. 2012 (working draft of 30 Nov 2012). Flora of the southern and mid-Atlantic states. Courtesy of the author, University of North Carolina, Chapel Hill.					Howell			2014						Occassional at this site; occasional in Carolina bay lakes			field values redacted: eventDate, month, day, startDayOfYear, recordNumber, locality, verbatimElevation, decimalLatitude, decimalLongitude, habitat
7289403	NCSC		024f44f2-a2f5-4daa-b306-c11efb5aa4d0	PreservedSpecimen	6b61d3c8-c517-4a6d-8b9a-2fe13b29cb0c	NCSC00088748		Plantae	Magnoliophyta		Poales	Cyperaceae	Scirpus cyperinus	(L.) Kunth	Scirpus	cyperinus					Weakley, A.S. 2012 (working draft of 30 Nov 2012). Flora of the southern and mid-Atlantic states. Courtesy of the author, University of North Carolina, Chapel Hill.					Howell	JOLA-45	2014-09-12	2014	9	12	255			Occassional at this site; occasional in Carolina bay lakes	Natural Lake Shoreline Swamp (Cypress Subtype; Schafale 2012)
7289404	NCSC		024f44f2-a2f5-4daa-b306-c11efb5aa4d0	PreservedSpecimen	187bab30-bddd-4c3f-8bcd-b4dd0b3f14fc	NCSC00088767		Plantae	Pteridophyta	Polypodiopsida	Polypodiales	Blechnaceae	Anchistea virginica	C.Presl	Anchistea	virginica					Weakley, A.S. 2012 (working draft of 30 Nov 2012). Flora of the southern and mid-Atlantic states. Courtesy of the author, University of North Carolina, Chapel Hill.					Howell	JOLA-44	2014-09-12	2014	9	12	255			Rare at this site; occasional in Carolina bay lakes	Natural Lake Shoreline Swamp (Cypress Subtype; Schafale 2012)
7289405	NCSC		024f44f2-a2f5-4daa-b306-c11efb5aa4d0	PreservedSpecimen	47fb7905-1f27-4b68-90ff-a65a5f1f238f	NCSC00088749		Plantae	Magnoliophyta		Poales	Cyperaceae	Cyperus polystachyos	Rottb.	Cyperus	polystachyos					Weakley, A.S. 2012 (working draft of 30 Nov 2012). Flora of the southern and mid-Atlantic states. Courtesy of the author, University of North Carolina, Chapel Hill.					Howell	JOLA-43	2014-09-12	2014	9	12	255			Rare at this site; rare in Carolina bay lakes	Natural Lake Shoreline Swamp (Cypress Subtype; Schafale 2012)
7289406	NCSC		024f44f2-a2f5-4daa-b306-c11efb5aa4d0	PreservedSpecimen	8425a664-7e19-45f6-b738-498594dd2e29	NCSC00088763		Plantae	Magnoliophyta		Poales	Xyridaceae	Xyris smalliana	Nash	Xyris	smalliana					Weakley, A.S. 2012 (working draft of 30 Nov 2012). Flora of the southern and mid-Atlantic states. Courtesy of the author, University of North Carolina, Chapel Hill.					Howell			2014						Occassional at this site; occasional in Carolina bay lakes			field values redacted: eventDate, month, day, startDayOfYear, recordNumber, locality, verbatimElevation, decimalLatitude, decimalLongitude, habitat
7289407	NCSC		024f44f2-a2f5-4daa-b306-c11efb5aa4d0	PreservedSpecimen	88c50dc5-d936-4635-b5bc-d0d773d95351	NCSC00088785		Plantae	Magnoliophyta		Poales	Poaceae	Panicum verrucosum	Muhl.	Panicum	verrucosum					Weakley, A.S. 2012 (working draft of 30 Nov 2012). Flora of the southern and mid-Atlantic states. Courtesy of the author, University of North Carolina, Chapel Hill.					Howell	JOLA-41	2014-09-12	2014	9	12	255			Rare at this site; occasional in Carolina bay lakes	Natural Lake Shoreline Swamp (Cypress Subtype; Schafale 2012)
7289408	NCSC		024f44f2-a2f5-4daa-b306-c11efb5aa4d0	PreservedSpecimen	92ebc96b-56ab-44db-973c-2139fd768ca9	NCSC00088786		Plantae	Magnoliophyta		Poales	Poaceae	Panicum verrucosum	Muhl.	Panicum	verrucosum					Weakley, A.S. 2012 (working draft of 30 Nov 2012). Flora of the southern and mid-Atlantic states. Courtesy of the author, University of North Carolina, Chapel Hill.					Howell	JOLA-40	2014-09-12	2014	9	12	255			Rare at this site; occasional in Carolina bay lakes	Natural Lake Shoreline Swamp (Cypress Subtype; Schafale 2012)
7289409	NCSC		024f44f2-a2f5-4daa-b306-c11efb5aa4d0	PreservedSpecimen	e206546b-a678-4ed2-ab9a-7f52b2dd7bf6	NCSC00088747		Plantae	Magnoliophyta		Poales	Cyperaceae	Scirpus cyperinus	(L.) Kunth	Scirpus	cyperinus					Weakley, A.S. 2012 (working draft of 30 Nov 2012). Flora of the southern and mid-Atlantic states. Courtesy of the author, University of North Carolina, Chapel Hill.					Howell	JOLA-4	2014-03-11	2014	3	11	70			Occassional at this site; occasional in Carolina bay lakes	Natural Lake Shoreline Swamp (Cypress Subtype; Schafale 2012)
7289410	NCSC		024f44f2-a2f5-4daa-b306-c11efb5aa4d0	PreservedSpecimen	c38db69f-7791-412a-bf78-99f2da534c1f	NCSC00088774		Plantae	Magnoliophyta		Myrtales	Melastomataceae	Rhexia nashii	Small	Rhexia	nashii					Weakley, A.S. 2012 (working draft of 30 Nov 2012). Flora of the southern and mid-Atlantic states. Courtesy of the author, University of North Carolina, Chapel Hill.					Howell	JOLA-39	2014-09-12	2014	9	12	255			Infreqent at this site; occasional in Carolina bay lakes	Natural Lake Shoreline Swamp (Cypress Subtype; Schafale 2012)
7289411	NCSC		024f44f2-a2f5-4daa-b306-c11efb5aa4d0	PreservedSpecimen	d3541f52-9411-4cfe-9b82-236fb2658ee5	NCSC00088775		Plantae	Magnoliophyta		Myrtales	Melastomataceae	Rhexia nashii	Small	Rhexia	nashii					Weakley, A.S. 2012 (working draft of 30 Nov 2012). Flora of the southern and mid-Atlantic states. Courtesy of the author, University of North Carolina, Chapel Hill.					Howell	JOLA-38	2014-09-12	2014	9	12	255			Infreqent at this site; occasional in Carolina bay lakes	Natural Lake Shoreline Swamp (Cypress Subtype; Schafale 2012)
7289412	NCSC		024f44f2-a2f5-4daa-b306-c11efb5aa4d0	PreservedSpecimen	0aa991c0-a39f-4c57-9e57-97812afec3a8	NCSC00088784		Plantae	Magnoliophyta		Poales	Poaceae	Saccharum giganteum	(Walter) Pers.	Saccharum	giganteum					Weakley, A.S. 2012 (working draft of 30 Nov 2012). Flora of the southern and mid-Atlantic states. Courtesy of the author, University of North Carolina, Chapel Hill.					Howell	JOLA-37	2014-09-12	2014	9	12	255			Infrequent at this site; infrequent in Carolina bay lakes	Natural Lake Shoreline Swamp (Cypress Subtype; Schafale 2012)
7289413	NCSC		024f44f2-a2f5-4daa-b306-c11efb5aa4d0	PreservedSpecimen	b6eca1b6-46a1-4ee0-bf42-810108bf2253	NCSC00088781		Plantae	Magnoliophyta		Poales	Juncaceae	Juncus pelocarpus	E. Mey.	Juncus	pelocarpus					Weakley, A.S. 2012 (working draft of 30 Nov 2012). Flora of the southern and mid-Atlantic states. Courtesy of the author, University of North Carolina, Chapel Hill.					Howell	JOLA-36	2014-09-12	2014	9	12	255			Occasional at this site; frequent in Carolina bay lakes	Natural Lake Shoreline Swamp (Cypress Subtype; Schafale 2012)
7289414	NCSC		024f44f2-a2f5-4daa-b306-c11efb5aa4d0	PreservedSpecimen	fbe85aa7-c0fd-49a1-aa07-16c663295810	NCSC00088780		Plantae	Magnoliophyta		Poales	Juncaceae	Juncus pelocarpus	E. Mey.	Juncus	pelocarpus					Weakley, A.S. 2012 (working draft of 30 Nov 2012). Flora of the southern and mid-Atlantic states. Courtesy of the author, University of North Carolina, Chapel Hill.					Howell	JOLA-35	2014-09-12	2014	9	12	255			Occasional at this site; frequent in Carolina bay lakes	Natural Lake Shoreline Swamp (Cypress Subtype; Schafale 2012)
7289415	NCSC		024f44f2-a2f5-4daa-b306-c11efb5aa4d0	PreservedSpecimen	4652eead-aa56-4e2d-8943-d27f3ceb3497	NCSC00088758		Plantae	Magnoliophyta		Gentianales	Gelsemiaceae	Gelsemium sempervirens	Ait.	Gelsemium	sempervirens					Weakley, A.S. 2012 (working draft of 30 Nov 2012). Flora of the southern and mid-Atlantic states. Courtesy of the author, University of North Carolina, Chapel Hill.					Howell	JOLA-34	2014-05-27	2014	5	27	147			Infrequent at this site; occasional in Carolina bay lakes	Natural Lake Shoreline Swamp (Cypress Subtype; Schafale 2012)
7289416	NCSC		024f44f2-a2f5-4daa-b306-c11efb5aa4d0	PreservedSpecimen	473a6ea3-df3e-4329-891b-192126fb7dac	NCSC00088768		Plantae	Magnoliophyta		Poales	Bromeliaceae	Tillandsia usneoides	L.	Tillandsia	usneoides					Weakley, A.S. 2012 (working draft of 30 Nov 2012). Flora of the southern and mid-Atlantic states. Courtesy of the author, University of North Carolina, Chapel Hill.					Howell	JOLA-33	2014-05-27	2014	5	27	147			Occasional at this site; frequent in Carolina bay lakes	Natural Lake Shoreline Swamp (Cypress Subtype; Schafale 2012)
7289417	NCSC		024f44f2-a2f5-4daa-b306-c11efb5aa4d0	PreservedSpecimen	aa00607c-279c-4092-b333-36b02f690095	NCSC00088766		Plantae	Magnoliophyta		Aquifoliales	Aquifoliaceae	Ilex coriacea	(Pursh) Chapm.	Ilex	coriacea					Weakley, A.S. 2012 (working draft of 30 Nov 2012). Flora of the southern and mid-Atlantic states. Courtesy of the author, University of North Carolina, Chapel Hill.					Howell	JOLA-32	2014-05-27	2014	5	27	147			Occassional at this site; infrequent in Carolina bay lakes	Natural Lake Shoreline Swamp (Cypress Subtype; Schafale 2012)
7289418	NCSC		024f44f2-a2f5-4daa-b306-c11efb5aa4d0	PreservedSpecimen	9fb7838a-941e-4274-8032-db0ae1919283	NCSC00088751		Plantae	Magnoliophyta		Ericales	Ericaceae	Lyonia ligustrina	(L.) DC.	Lyonia	ligustrina					Weakley, A.S. 2012 (working draft of 30 Nov 2012). Flora of the southern and mid-Atlantic states. Courtesy of the author, University of North Carolina, Chapel Hill.					Howell	JOLA-31	2014-05-27	2014	5	27	147			Infrequent at this site; rare in Carolina bay lakes	Natural Lake Shoreline Swamp (Cypress Subtype; Schafale 2012)
7289419	NCSC		024f44f2-a2f5-4daa-b306-c11efb5aa4d0	PreservedSpecimen	c46e8c86-667b-4740-b355-a1f8073bb507	NCSC00088752		Plantae	Magnoliophyta		Ericales	Ericaceae	Eubotrys racemosa	(L.) Nutt.	Eubotrys	racemosa					Weakley, A.S. 2012 (working draft of 30 Nov 2012). Flora of the southern and mid-Atlantic states. Courtesy of the author, University of North Carolina, Chapel Hill.					Howell	JOLA-30	2014-05-27	2014	5	27	147			Occassional at this site; occasional in Carolina bay lakes	Natural Lake Shoreline Swamp (Cypress Subtype; Schafale 2012)
7289420	NCSC		024f44f2-a2f5-4daa-b306-c11efb5aa4d0	PreservedSpecimen	0ba8add7-8ade-4c93-93d7-f27fe3b9f595	NCSC00088771		Plantae	Coniferophyta		Pinales	Cupressaceae	Taxodium ascendens	Brongn.	Taxodium	ascendens					Weakley, A.S. 2012 (working draft of 30 Nov 2012). Flora of the southern and mid-Atlantic states. Courtesy of the author, University of North Carolina, Chapel Hill.					Howell	JOLA-3	2014-03-11	2014	3	11	70			Abundant at this site; abundant in Carolina bay lakes	Natural Lake Shoreline Swamp (Cypress Subtype; Schafale 2012)
7289421	NCSC		024f44f2-a2f5-4daa-b306-c11efb5aa4d0	PreservedSpecimen	d54654a6-0d02-469d-ae99-d9e0a30dfd10	NCSC00088776		Plantae	Magnoliophyta		Magnoliales	Magnoliaceae	Magnolia virginiana	L.	Magnolia	virginiana					Weakley, A.S. 2012 (working draft of 30 Nov 2012). Flora of the southern and mid-Atlantic states. Courtesy of the author, University of North Carolina, Chapel Hill.					Howell	JOLA-29	2014-05-27	2014	5	27	147			Occassional at this site; occasional in Carolina bay lakes	Natural Lake Shoreline Swamp (Cypress Subtype; Schafale 2012)
7289422	NCSC		024f44f2-a2f5-4daa-b306-c11efb5aa4d0	PreservedSpecimen	19849f51-2c81-4afd-8f7c-9ae89455b457	NCSC00088761		Plantae	Magnoliophyta		Poales	Xyridaceae	Xyris		Xyris						Weakley, A.S. 2012 (working draft of 30 Nov 2012). Flora of the southern and mid-Atlantic states. Courtesy of the author, University of North Carolina, Chapel Hill.					Howell	JOLA-28	2014-05-27	2014	5	27	147			Occassional at this site; occasional in Carolina bay lakes	Natural Lake Shoreline Swamp (Cypress Subtype; Schafale 2012)
7289423	NCSC		024f44f2-a2f5-4daa-b306-c11efb5aa4d0	PreservedSpecimen	7a84fcd2-6949-411a-843f-0e44df6fdfa1	NCSC00088759		Plantae	Magnoliophyta		Saxifragales	Iteaceae	Itea virginica	L.	Itea	virginica					Weakley, A.S. 2012 (working draft of 30 Nov 2012). Flora of the southern and mid-Atlantic states. Courtesy of the author, University of North Carolina, Chapel Hill.					Howell	JOLA-27	2014-05-27	2014	5	27	147			Occassional at this site; occasional in Carolina bay lakes	Natural Lake Shoreline Swamp (Cypress Subtype; Schafale 2012)
7289424	NCSC		024f44f2-a2f5-4daa-b306-c11efb5aa4d0	PreservedSpecimen	6d91d889-83da-4ba9-94f8-a5bb033c4f4f	NCSC00088756		Plantae	Magnoliophyta		Ericales	Ericaceae	Vaccinium formosum	Andrews	Vaccinium	formosum					Weakley, A.S. 2012 (working draft of 30 Nov 2012). Flora of the southern and mid-Atlantic states. Courtesy of the author, University of North Carolina, Chapel Hill.					Howell	JOLA-26	2014-05-27	2014	5	27	147			Occassional at this site; occasional in Carolina bay lakes	Natural Lake Shoreline Swamp (Cypress Subtype; Schafale 2012)
7289425	NCSC		024f44f2-a2f5-4daa-b306-c11efb5aa4d0	PreservedSpecimen	a65e3eb9-22ff-47fd-9933-cda3b0cf4450	NCSC00088753		Plantae	Magnoliophyta		Ericales	Ericaceae	Zenobia pulverulenta	(Bartram ex Willd.) Pollard	Zenobia	pulverulenta					Weakley, A.S. 2012 (working draft of 30 Nov 2012). Flora of the southern and mid-Atlantic states. Courtesy of the author, University of North Carolina, Chapel Hill.					Howell	JOLA-25	2014-05-27	2014	5	27	147			Occasional at this site; occasional in Carolina bay lakes	Natural Lake Shoreline Swamp (Cypress Subtype; Schafale 2012)
7289426	NCSC		024f44f2-a2f5-4daa-b306-c11efb5aa4d0	PreservedSpecimen	420e58ff-1094-48b1-b682-b26d303bc35a	NCSC00088757		Plantae	Magnoliophyta		Ericales	Ericaceae	Vaccinium formosum	Andrews	Vaccinium	formosum					Weakley, A.S. 2012 (working draft of 30 Nov 2012). Flora of the southern and mid-Atlantic states. Courtesy of the author, University of North Carolina, Chapel Hill.					Howell	JOLA-24	2014-05-27	2014	5	27	147			Occassional at this site; occasional in Carolina bay lakes	Natural Lake Shoreline Swamp (Cypress Subtype; Schafale 2012)
7289427	NCSC		024f44f2-a2f5-4daa-b306-c11efb5aa4d0	PreservedSpecimen	68e88294-4e6e-45da-b433-8deff8a8d091	NCSC00088745		Plantae	Coniferophyta		Pinales	Cupressaceae	Chamaecyparis thyoides	(L.) Britton, Sterns & Poggenb.	Chamaecyparis	thyoides					Weakley, A.S. 2012 (working draft of 30 Nov 2012). Flora of the southern and mid-Atlantic states. Courtesy of the author, University of North Carolina, Chapel Hill.					Howell	JOLA-23	2014-05-27	2014	5	27	147			Occassional at this site; occasional in Carolina bay lakes	Natural Lake Shoreline Swamp (Cypress Subtype; Schafale 2012)
7289428	NCSC		024f44f2-a2f5-4daa-b306-c11efb5aa4d0	PreservedSpecimen	485c5f1b-095b-40e5-adc0-433b69ab654d	NCSC00088746		Plantae	Coniferophyta		Pinales	Cupressaceae	Taxodium ascendens	Brongn.	Taxodium	ascendens					Weakley, A.S. 2012 (working draft of 30 Nov 2012). Flora of the southern and mid-Atlantic states. Courtesy of the author, University of North Carolina, Chapel Hill.					Howell	JOLA-22	2014-05-27	2014	5	27	147			Abundant at this site; abundant in Carolina bay lakes	Natural Lake Shoreline Swamp (Cypress Subtype; Schafale 2012)
7289429	NCSC		024f44f2-a2f5-4daa-b306-c11efb5aa4d0	PreservedSpecimen	8543afc8-bd8f-4020-893d-edad5ff2ecd1	NCSC00088789		Plantae	Magnoliophyta		Sapindales	Sapindaceae	Acer rubrum	Wats.	Acer	rubrum					Weakley, A.S. 2012 (working draft of 30 Nov 2012). Flora of the southern and mid-Atlantic states. Courtesy of the author, University of North Carolina, Chapel Hill.					Howell	JOLA-21	2014-05-27	2014	5	27	147			Occassional at this site; occasional in Carolina bay lakes	Natural Lake Shoreline Swamp (Cypress Subtype; Schafale 2012)
7289430	NCSC		024f44f2-a2f5-4daa-b306-c11efb5aa4d0	PreservedSpecimen	99f57016-2c4e-4754-83b8-95343e26d59f	NCSC00088762		Plantae	Magnoliophyta		Poales	Xyridaceae	Xyris		Xyris						Weakley, A.S. 2012 (working draft of 30 Nov 2012). Flora of the southern and mid-Atlantic states. Courtesy of the author, University of North Carolina, Chapel Hill.					Howell	JOLA-20	2014-05-27	2014	5	27	147			Occassional at this site; occasional in Carolina bay lakes	Natural Lake Shoreline Swamp (Cypress Subtype; Schafale 2012)
7289431	NCSC		024f44f2-a2f5-4daa-b306-c11efb5aa4d0	PreservedSpecimen	06cd3362-6981-4b43-b811-36033b133f12	NCSC00088760		Plantae	Magnoliophyta		Ericales	Theaceae	Gordonia lasianthus	L.	Gordonia	lasianthus					Weakley, A.S. 2012 (working draft of 30 Nov 2012). Flora of the southern and mid-Atlantic states. Courtesy of the author, University of North Carolina, Chapel Hill.					Howell	JOLA-2	2014-03-11	2014	3	11	70			Occassional at this site; occasional in Carolina bay lakes	Natural Lake Shoreline Swamp (Cypress Subtype; Schafale 2012)
7289432	NCSC		024f44f2-a2f5-4daa-b306-c11efb5aa4d0	PreservedSpecimen	4acc2469-5c87-4f30-852e-00539e9150a5	NCSC00088754		Plantae	Magnoliophyta		Ericales	Ericaceae	Lyonia lucida	(Lam.) K. Koch	Lyonia	lucida					Weakley, A.S. 2012 (working draft of 30 Nov 2012). Flora of the southern and mid-Atlantic states. Courtesy of the author, University of North Carolina, Chapel Hill.					Howell	JOLA-19	2014-05-27	2014	5	27	147			Frequent at this site; frequent in Carolina bay lakes	Natural Lake Shoreline Swamp (Cypress Subtype; Schafale 2012)
7289433	NCSC		024f44f2-a2f5-4daa-b306-c11efb5aa4d0	PreservedSpecimen	0f5fe461-080d-4727-99ec-c8d05f63b43e	NCSC00088778		Plantae	Magnoliophyta		Laurales	Lauraceae	Persea palustris	(Raf.) Sarg.	Persea	palustris					Weakley, A.S. 2012 (working draft of 30 Nov 2012). Flora of the southern and mid-Atlantic states. Courtesy of the author, University of North Carolina, Chapel Hill.					Howell	JOLA-18	2014-05-27	2014	5	27	147			Frequent at this site; frequent in Carolina bay lakes	Natural Lake Shoreline Swamp (Cypress Subtype; Schafale 2012)
7289434	NCSC		024f44f2-a2f5-4daa-b306-c11efb5aa4d0	PreservedSpecimen	b0f6ee4a-9d8d-4e9a-be5f-785a68753ff8	NCSC00088782		Plantae	Magnoliophyta		Poales	Juncaceae	Juncus pelocarpus	E. Mey.	Juncus	pelocarpus					Weakley, A.S. 2012 (working draft of 30 Nov 2012). Flora of the southern and mid-Atlantic states. Courtesy of the author, University of North Carolina, Chapel Hill.					Howell	JOLA-17	2014-03-11	2014	3	11	70			Occasional at this site; frequent in Carolina bay lakes	Natural Lake Shoreline Swamp (Cypress Subtype; Schafale 2012)
7289435	NCSC		024f44f2-a2f5-4daa-b306-c11efb5aa4d0	PreservedSpecimen	cfa7d816-77b0-4d0f-a7e2-353e1c311c33	NCSC00088783		Plantae	Magnoliophyta		Poales	Poaceae	Andropogon glaucopsis	Elliot	Andropogon	glaucopsis					Weakley, A.S. 2012 (working draft of 30 Nov 2012). Flora of the southern and mid-Atlantic states. Courtesy of the author, University of North Carolina, Chapel Hill.					Howell	JOLA-16	2014-03-11	2014	3	11	70			Infrequent at this site; occasional in Carolina bay lakes	Natural Lake Shoreline Swamp (Cypress Subtype; Schafale 2012)
7289436	NCSC		024f44f2-a2f5-4daa-b306-c11efb5aa4d0	PreservedSpecimen	b556bf25-c423-4097-ad14-5ad63b284eb9	NCSC00088773		Plantae	Magnoliophyta		Fagales	Myricaceae	Morella cerifera	Small	Morella	cerifera					Weakley, A.S. 2012 (working draft of 30 Nov 2012). Flora of the southern and mid-Atlantic states. Courtesy of the author, University of North Carolina, Chapel Hill.					Howell	JOLA-15	2014-03-11	2014	3	11	70			Infrequent at this site; occasional in Carolina bay lakes	Natural Lake Shoreline Swamp (Cypress Subtype; Schafale 2012)
7289437	NCSC		024f44f2-a2f5-4daa-b306-c11efb5aa4d0	PreservedSpecimen	53ea8595-caf3-467c-8e97-2fea6b5bd1a2	NCSC00088772		Plantae	Coniferophyta		Pinales	Pinaceae	Pinus serotina	Michx.	Pinus	serotina					Weakley, A.S. 2012 (working draft of 30 Nov 2012). Flora of the southern and mid-Atlantic states. Courtesy of the author, University of North Carolina, Chapel Hill.					Howell	JOLA-14	2014-03-11	2014	3	11	70			Rare at this site; rare in Carolina bay lakes	Natural Lake Shoreline Swamp (Cypress Subtype; Schafale 2012)
7289438	NCSC		024f44f2-a2f5-4daa-b306-c11efb5aa4d0	PreservedSpecimen	532ce9c1-f673-4796-9963-af760642dcc7	NCSC00088755		Plantae	Magnoliophyta		Ericales	Ericaceae	Vaccinium formosum	Andrews	Vaccinium	formosum					Weakley, A.S. 2012 (working draft of 30 Nov 2012). Flora of the southern and mid-Atlantic states. Courtesy of the author, University of North Carolina, Chapel Hill.					Howell	JOLA-13	2014-03-11	2014	3	11	70			Occassional at this site; occasional in Carolina bay lakes	Natural Lake Shoreline Swamp (Cypress Subtype; Schafale 2012)
7289439	NCSC		024f44f2-a2f5-4daa-b306-c11efb5aa4d0	PreservedSpecimen	eccafa31-1091-40de-9b52-611920695c5e	NCSC00088787		Plantae	Magnoliophyta		Santalales	Santalaceae	Phoradendron leucarpum	(Raf.) Reveal & M.C. Johnston	Phoradendron	leucarpum					Weakley, A.S. 2012 (working draft of 30 Nov 2012). Flora of the southern and mid-Atlantic states. Courtesy of the author, University of North Carolina, Chapel Hill.					Howell	JOLA-12	2014-03-11	2014	3	11	70			Infrequent at this site; infrequent in Carolina bay lakes	Natural Lake Shoreline Swamp (Cypress Subtype; Schafale 2012)
7289440	NCSC		024f44f2-a2f5-4daa-b306-c11efb5aa4d0	PreservedSpecimen	708c0465-c39f-4d1b-9f94-d508c9555ee9	NCSC00088750		Plantae	Magnoliophyta		Ericales	Ericaceae	Lyonia lucida	(Lam.) K. Koch	Lyonia	lucida					Weakley, A.S. 2012 (working draft of 30 Nov 2012). Flora of the southern and mid-Atlantic states. Courtesy of the author, University of North Carolina, Chapel Hill.					Howell	JOLA-11	2014-03-11	2014	3	11	70			Frequent at this site; frequent in Carolina bay lakes	Natural Lake Shoreline Swamp (Cypress Subtype; Schafale 2012)
7289441	NCSC		024f44f2-a2f5-4daa-b306-c11efb5aa4d0	PreservedSpecimen	63031e17-7bae-4ade-bcfe-bd693ad9413c	NCSC00088765		Plantae	Magnoliophyta		Aquifoliales	Aquifoliaceae	Ilex coriacea	(Pursh) Chapm.	Ilex	coriacea					Weakley, A.S. 2012 (working draft of 30 Nov 2012). Flora of the southern and mid-Atlantic states. Courtesy of the author, University of North Carolina, Chapel Hill.					Howell	JOLA-10	2014-03-11	2014	3	11	70			Occassional at this site; infrequent in Carolina bay lakes	Natural Lake Shoreline Swamp (Cypress Subtype; Schafale 2012)
7289442	NCSC		024f44f2-a2f5-4daa-b306-c11efb5aa4d0	PreservedSpecimen	f164cafd-0b1b-4c47-9828-c64e2f133944	NCSC00088770		Plantae	Coniferophyta		Pinales	Cupressaceae	Chamaecyparis thyoides	(L.) Britton, Sterns & Poggenb.	Chamaecyparis	thyoides					Weakley, A.S. 2012 (working draft of 30 Nov 2012). Flora of the southern and mid-Atlantic states. Courtesy of the author, University of North Carolina, Chapel Hill.					Howell	JOLA-1	2014-03-11	2014	3	11	70			Occasional at this site; occassional in Carolina bay lakes	Natural Lake Shoreline Swamp (Cypress Subtype; Schafale 2012)
7289443	NCSC		024f44f2-a2f5-4daa-b306-c11efb5aa4d0	PreservedSpecimen	07a19466-e472-468d-a67c-0586f7d48a5c	NCSC00088596		Plantae	Magnoliophyta		Saxifragales	Iteaceae	Itea virginica	L.	Itea	virginica					Weakley, A.S. 2012 (working draft of 30 Nov 2012). Flora of the southern and mid-Atlantic states. Courtesy of the author, University of North Carolina, Chapel Hill.					Howell	HOLA-9	2014-05-06	2014	5	6	126			Occasional at this site; occasional in Carolina bay lakes	Coastal Plain Semipermanent Impoundment (Cypress-Gum Subtype) (Schafale 2012)
7289444	NCSC		024f44f2-a2f5-4daa-b306-c11efb5aa4d0	PreservedSpecimen	ea63d371-65e1-4939-92a4-bc05588ca7aa	NCSC00088597		Plantae	Magnoliophyta		Poales	Juncaceae	Juncus effusus	L.	Juncus	effusus					Weakley, A.S. 2012 (working draft of 30 Nov 2012). Flora of the southern and mid-Atlantic states. Courtesy of the author, University of North Carolina, Chapel Hill.					Howell	HOLA-8	2014-05-06	2014	5	6	126			Infrequent at this site; infrequent in Carolina bay lakes	Coastal Plain Semipermanent Impoundment (Cypress-Gum Subtype) (Schafale 2012)
7289445	NCSC		024f44f2-a2f5-4daa-b306-c11efb5aa4d0	PreservedSpecimen	48f7538c-883b-4c39-9a8f-f343c2ad0d17	NCSC00088592		Plantae	Magnoliophyta		Ericales	Ericaceae	Lyonia lucida	(Lam.) K. Koch	Lyonia	lucida					Weakley, A.S. 2012 (working draft of 30 Nov 2012). Flora of the southern and mid-Atlantic states. Courtesy of the author, University of North Carolina, Chapel Hill.					Howell	HOLA-7	2014-05-06	2014	5	6	126			Occasional at this site; frequent in Carolina bay lakes	Coastal Plain Semipermanent Impoundment (Cypress-Gum Subtype) (Schafale 2012)
7289446	NCSC		024f44f2-a2f5-4daa-b306-c11efb5aa4d0	PreservedSpecimen	bb2b3b23-1a72-4f76-bcf1-627e161704f1	NCSC00088593		Plantae	Magnoliophyta		Ericales	Ericaceae	Chamaedaphne calyculata	Moench	Chamaedaphne	calyculata					Weakley, A.S. 2012 (working draft of 30 Nov 2012). Flora of the southern and mid-Atlantic states. Courtesy of the author, University of North Carolina, Chapel Hill.					Howell	HOLA-6	2014-05-06	2014	5	6	126			Occasional at this site; occasional in Carolina bay lakes	Coastal Plain Semipermanent Impoundment (Cypress-Gum Subtype) (Schafale 2012); Floating Bog (Schafale 2012)
7289447	NCSC		024f44f2-a2f5-4daa-b306-c11efb5aa4d0	PreservedSpecimen	c2dfad7f-3b7d-437a-a97b-f573971ef032	NCSC00088502		Plantae	Magnoliophyta		Poales	Cyperaceae	Rhynchospora inundata	(Oakes) Fernald	Rhynchospora	inundata					Weakley, A.S. 2012 (working draft of 30 Nov 2012). Flora of the southern and mid-Atlantic states. Courtesy of the author, University of North Carolina, Chapel Hill.					Howell			2014						Infrequent at this site; rare in Carolina bay lakes			field values redacted: eventDate, month, day, startDayOfYear, recordNumber, locality, verbatimElevation, decimalLatitude, decimalLongitude, habitat
7289448	NCSC		024f44f2-a2f5-4daa-b306-c11efb5aa4d0	PreservedSpecimen	20782373-3541-4fce-96d6-aab79ce6c5f4	NCSC00088513		Plantae	Lycopodiophyta		Lycopodiales	Lycopodiaceae	Lycopodiella appressa	(Chapm.) Cranfill	Lycopodiella	appressa					Weakley, A.S. 2012 (working draft of 30 Nov 2012). Flora of the southern and mid-Atlantic states. Courtesy of the author, University of North Carolina, Chapel Hill.					Howell	HOLA-52	2014-07-08	2014	7	8	189			Infrequent at this site; occasional in Carolina bay lakes	Coastal Plain Semipermanent Impoundment (Cypress-Gum Subtype) (Schafale 2012); Floating Bog (Schafale 2012)
7289449	NCSC		024f44f2-a2f5-4daa-b306-c11efb5aa4d0	PreservedSpecimen	3b27e478-5d85-4bc0-95a8-9e2e3543ff42	NCSC00088509		Plantae	Magnoliophyta		Commelinales	Haemodoraceae	Lachnanthes caroliniana	(Lam.) Dandy	Lachnanthes	caroliniana					Weakley, A.S. 2012 (working draft of 30 Nov 2012). Flora of the southern and mid-Atlantic states. Courtesy of the author, University of North Carolina, Chapel Hill.					Howell	HOLA-51	2014-07-08	2014	7	8	189			Infrequent at this site; occasional in Carolina bay lakes	Coastal Plain Semipermanent Impoundment (Cypress-Gum Subtype) (Schafale 2012); Floating Bog (Schafale 2012)
7289450	NCSC		024f44f2-a2f5-4daa-b306-c11efb5aa4d0	PreservedSpecimen	60974225-faa9-4451-95bf-7a39be73ac53	NCSC00088517		Plantae	Magnoliophyta		Fabales	Polygalaceae	Polygala lutea	L.	Polygala	lutea					Weakley, A.S. 2012 (working draft of 30 Nov 2012). Flora of the southern and mid-Atlantic states. Courtesy of the author, University of North Carolina, Chapel Hill.					Howell	HOLA-50	2014-07-08	2014	7	8	189			Rare at this site; rare in Carolina bay lakes	Coastal Plain Semipermanent Impoundment (Cypress-Gum Subtype) (Schafale 2012)
7289451	NCSC		024f44f2-a2f5-4daa-b306-c11efb5aa4d0	PreservedSpecimen	95543f27-e7f1-4e04-bf0b-06f7d88df4d9	NCSC00088608		Plantae	Magnoliophyta		Sapindales	Sapindaceae	Acer rubrum	Wats.	Acer	rubrum					Weakley, A.S. 2012 (working draft of 30 Nov 2012). Flora of the southern and mid-Atlantic states. Courtesy of the author, University of North Carolina, Chapel Hill.					Howell	HOLA-5	2014-03-08	2014	3	8	67			Occasional at this site; occasional in Carolina bay lakes	Coastal Plain Semipermanent Impoundment (Cypress-Gum Subtype) (Schafale 2012)
7289452	NCSC		024f44f2-a2f5-4daa-b306-c11efb5aa4d0	PreservedSpecimen	7d669238-add3-4e19-a872-59f04a8fd122	NCSC00088505		Plantae	Magnoliophyta		Caryophyllales	Droseraceae	Drosera intermedia	Hayne	Drosera	intermedia					Weakley, A.S. 2012 (working draft of 30 Nov 2012). Flora of the southern and mid-Atlantic states. Courtesy of the author, University of North Carolina, Chapel Hill.					Howell			2014						Frequent at this site; infrequent in Carolina bay lakes			field values redacted: eventDate, month, day, startDayOfYear, recordNumber, locality, verbatimElevation, decimalLatitude, decimalLongitude, habitat
7289453	NCSC		024f44f2-a2f5-4daa-b306-c11efb5aa4d0	PreservedSpecimen	0930aeb3-7170-4c8f-9998-71336dc5bc0b	NCSC00088511		Plantae	Magnoliophyta		Malpighiales	Hypericaceae	Hypericum canadense	L.	Hypericum	canadense					Weakley, A.S. 2012 (working draft of 30 Nov 2012). Flora of the southern and mid-Atlantic states. Courtesy of the author, University of North Carolina, Chapel Hill.					Howell	HOLA-48	2014-07-08	2014	7	8	189			Rare at this site; rare in Carolina bay lakes	Coastal Plain Semipermanent Impoundment (Cypress-Gum Subtype) (Schafale 2012)
7289454	NCSC		024f44f2-a2f5-4daa-b306-c11efb5aa4d0	PreservedSpecimen	28673fc2-8958-4b67-a1ac-eb472e9667b6	NCSC00088501		Plantae	Magnoliophyta		Asterales	Campanulaceae	Lobelia nuttallii	Schult.	Lobelia	nuttallii					Weakley, A.S. 2012 (working draft of 30 Nov 2012). Flora of the southern and mid-Atlantic states. Courtesy of the author, University of North Carolina, Chapel Hill.					Howell	HOLA-47	2014-07-08	2014	7	8	189			Rare at this site; rare in Carolina bay lakes	Coastal Plain Semipermanent Impoundment (Cypress-Gum Subtype) (Schafale 2012)
7289455	NCSC		024f44f2-a2f5-4daa-b306-c11efb5aa4d0	PreservedSpecimen	4b4b3774-11e8-4cc0-a068-4e9187b640ba	NCSC00088515		Plantae	Magnoliophyta		Myrtales	Melastomataceae	Rhexia mariana	L.	Rhexia	mariana					Weakley, A.S. 2012 (working draft of 30 Nov 2012). Flora of the southern and mid-Atlantic states. Courtesy of the author, University of North Carolina, Chapel Hill.					Howell	HOLA-46	2014-07-08	2014	7	8	189			Rare at this site; rare in Carolina bay lakes	Coastal Plain Semipermanent Impoundment (Cypress-Gum Subtype) (Schafale 2012)
7289456	NCSC		024f44f2-a2f5-4daa-b306-c11efb5aa4d0	PreservedSpecimen	fb675d9b-4f96-4f46-b4ef-3ff561107adf	NCSC00088503		Plantae	Magnoliophyta		Poales	Cyperaceae	Rhynchospora alba	(L.) Vahl	Rhynchospora	alba					Weakley, A.S. 2012 (working draft of 30 Nov 2012). Flora of the southern and mid-Atlantic states. Courtesy of the author, University of North Carolina, Chapel Hill.					Howell			2014						Occasional at this site; rare in Carolina bay lakes			field values redacted: eventDate, month, day, startDayOfYear, recordNumber, locality, verbatimElevation, decimalLatitude, decimalLongitude, habitat
7289457	NCSC		024f44f2-a2f5-4daa-b306-c11efb5aa4d0	PreservedSpecimen	9f9fc8fc-0782-44d0-9e7e-e30a8a69d592	NCSC00088514		Plantae	Magnoliophyta		Myrtales	Melastomataceae	Rhexia nashii	Small	Rhexia	nashii					Weakley, A.S. 2012 (working draft of 30 Nov 2012). Flora of the southern and mid-Atlantic states. Courtesy of the author, University of North Carolina, Chapel Hill.					Howell	HOLA-44	2014-07-08	2014	7	8	189			Occasional at this site; occasional in Carolina bay lakes	Coastal Plain Semipermanent Impoundment (Cypress-Gum Subtype) (Schafale 2012); Floating Bog (Schafale 2012)
7289458	NCSC		024f44f2-a2f5-4daa-b306-c11efb5aa4d0	PreservedSpecimen	f268d9bc-4ea3-4f62-8c9f-b6c59bf4150c	NCSC00088500		Plantae	Magnoliophyta		Nymphaeales	Cabombaceae	Brasenia schreberi	J.F. Gmel.	Brasenia	schreberi					Weakley, A.S. 2012 (working draft of 30 Nov 2012). Flora of the southern and mid-Atlantic states. Courtesy of the author, University of North Carolina, Chapel Hill.					Howell	HOLA-43	2014-07-08	2014	7	8	189			Infrequent at this site; rare in Carolina bay lakes	Coastal Plain Semipermanent Impoundment (Cypress-Gum Subtype) (Schafale 2012)
7289459	NCSC		024f44f2-a2f5-4daa-b306-c11efb5aa4d0	PreservedSpecimen	4a700718-28df-4435-a29d-d47246ef76f7	NCSC00088507		Plantae	Magnoliophyta		Ericales	Ericaceae	Chamaedaphne calyculata	Moench	Chamaedaphne	calyculata					Weakley, A.S. 2012 (working draft of 30 Nov 2012). Flora of the southern and mid-Atlantic states. Courtesy of the author, University of North Carolina, Chapel Hill.					Howell	HOLA-42	2014-06-10	2014	6	10	161			Occasional at this site; occasional in Carolina bay lakes	Coastal Plain Semipermanent Impoundment (Cypress-Gum Subtype) (Schafale 2012); Floating Bog (Schafale 2012)
7289460	NCSC		024f44f2-a2f5-4daa-b306-c11efb5aa4d0	PreservedSpecimen	fd10e091-58fc-4da7-b4d2-e553d926fdb8	NCSC00088518		Plantae	Magnoliophyta		Ericales	Sarraceniaceae	Sarracenia flava	L.	Sarracenia	flava					Weakley, A.S. 2012 (working draft of 30 Nov 2012). Flora of the southern and mid-Atlantic states. Courtesy of the author, University of North Carolina, Chapel Hill.					Howell			2014						Abundant at this site; rare in Carolina bay lakes			field values redacted: eventDate, month, day, startDayOfYear, recordNumber, locality, verbatimElevation, decimalLatitude, decimalLongitude, habitat
7289461	NCSC		024f44f2-a2f5-4daa-b306-c11efb5aa4d0	PreservedSpecimen	3ddb38ca-0f78-4df3-8b60-63a6a0e59dab	NCSC00088506		Plantae	Magnoliophyta		Caryophyllales	Droseraceae	Drosera intermedia	Hayne	Drosera	intermedia					Weakley, A.S. 2012 (working draft of 30 Nov 2012). Flora of the southern and mid-Atlantic states. Courtesy of the author, University of North Carolina, Chapel Hill.					Howell			2014						Frequent at this site; infrequent in Carolina bay lakes			field values redacted: eventDate, month, day, startDayOfYear, recordNumber, locality, verbatimElevation, decimalLatitude, decimalLongitude, habitat
7289462	NCSC		024f44f2-a2f5-4daa-b306-c11efb5aa4d0	PreservedSpecimen	7bba087b-26fa-486e-b4ce-30f4a8a38364	NCSC00088595		Plantae	Magnoliophyta		Gentianales	Gelsemiaceae	Gelsemium sempervirens	Ait.	Gelsemium	sempervirens					Weakley, A.S. 2012 (working draft of 30 Nov 2012). Flora of the southern and mid-Atlantic states. Courtesy of the author, University of North Carolina, Chapel Hill.					Howell	HOLA-4	2014-03-08	2014	3	8	67			Rare at this site; occasional in Carolina bay lakes	Coastal Plain Semipermanent Impoundment (Cypress-Gum Subtype) (Schafale 2012); Floating Bog (Schafale 2012)
7289463	NCSC		024f44f2-a2f5-4daa-b306-c11efb5aa4d0	PreservedSpecimen	32d675e7-ff7d-4d2f-b166-31ad2b42e650	NCSC00088516		Plantae	Magnoliophyta		Asparagales	Orchidaceae	Calopogon tuberosus	(L.) Britton, Sterns & Poggenb.	Calopogon	tuberosus					Weakley, A.S. 2012 (working draft of 30 Nov 2012). Flora of the southern and mid-Atlantic states. Courtesy of the author, University of North Carolina, Chapel Hill.					Howell			2014						Occasional at this site; rare in Carolina bay lakes			field values redacted: eventDate, month, day, startDayOfYear, recordNumber, locality, verbatimElevation, decimalLatitude, decimalLongitude, habitat
7289464	NCSC		024f44f2-a2f5-4daa-b306-c11efb5aa4d0	PreservedSpecimen	aeb94fb3-2300-434c-bc4c-b5ea4cd285a6	NCSC00088519		Plantae	Magnoliophyta		Liliales	Smilacaceae	Smilax walteri	Pursh	Smilax	walteri					Weakley, A.S. 2012 (working draft of 30 Nov 2012). Flora of the southern and mid-Atlantic states. Courtesy of the author, University of North Carolina, Chapel Hill.					Howell	HOLA-38	2014-06-10	2014	6	10	161			Occasional at this site; infrequent in Carolina bay lakes	Coastal Plain Semipermanent Impoundment (Cypress-Gum Subtype) (Schafale 2012); Floating Bog (Schafale 2012)
7289465	NCSC		024f44f2-a2f5-4daa-b306-c11efb5aa4d0	PreservedSpecimen	7da9f2b8-6e33-4bce-a567-ce9ef34bd22e	NCSC00088504		Plantae	Magnoliophyta		Ericales	Cyrillaceae	Cyrilla racemiflora	L.	Cyrilla	racemiflora					Weakley, A.S. 2012 (working draft of 30 Nov 2012). Flora of the southern and mid-Atlantic states. Courtesy of the author, University of North Carolina, Chapel Hill.					Howell	HOLA-37	2014-06-10	2014	6	10	161			Occasional at this site; frequent in Carolina bay lakes	Coastal Plain Semipermanent Impoundment (Cypress-Gum Subtype) (Schafale 2012); Floating Bog (Schafale 2012)
7289466	NCSC		024f44f2-a2f5-4daa-b306-c11efb5aa4d0	PreservedSpecimen	003066ce-7320-4b67-8277-98180492db0b	NCSC00088512		Plantae	Magnoliophyta		Lamiales	Lentibulariaceae	Utricularia purpurea	Walter	Utricularia	purpurea					Weakley, A.S. 2012 (working draft of 30 Nov 2012). Flora of the southern and mid-Atlantic states. Courtesy of the author, University of North Carolina, Chapel Hill.					Howell	HOLA-36	2014-05-26	2014	5	26	146			Occasional at this site; rare in Carolina bay lakes	Coastal Plain Semipermanent Impoundment (Cypress-Gum Subtype) (Schafale 2012)
7289467	NCSC		024f44f2-a2f5-4daa-b306-c11efb5aa4d0	PreservedSpecimen	c95e382d-1df6-45a7-b28e-0d0507dec480	NCSC00088508		Plantae	Magnoliophyta		Ericales	Ericaceae	Zenobia pulverulenta	(Bartram ex Willd.) Pollard	Zenobia	pulverulenta					Weakley, A.S. 2012 (working draft of 30 Nov 2012). Flora of the southern and mid-Atlantic states. Courtesy of the author, University of North Carolina, Chapel Hill.					Howell	HOLA-35	2014-05-26	2014	5	26	146			Occasional at this site; occasional in Carolina bay lakes	Coastal Plain Semipermanent Impoundment (Cypress-Gum Subtype) (Schafale 2012); Floating Bog (Schafale 2012)
7289468	NCSC		024f44f2-a2f5-4daa-b306-c11efb5aa4d0	PreservedSpecimen	0674f113-fc25-4cc8-bf62-14fae48f4807	NCSC00088499		Plantae	Magnoliophyta		Alismatales	Alismataceae	Sagittaria isoetiformis	J.G. Sm.	Sagittaria	isoetiformis					Weakley, A.S. 2012 (working draft of 30 Nov 2012). Flora of the southern and mid-Atlantic states. Courtesy of the author, University of North Carolina, Chapel Hill.					Howell			2014						Infrequent at this site; infrequent in Carolina bay lakes			field values redacted: eventDate, month, day, startDayOfYear, recordNumber, locality, verbatimElevation, decimalLatitude, decimalLongitude, habitat
7289469	NCSC		024f44f2-a2f5-4daa-b306-c11efb5aa4d0	PreservedSpecimen	95b7a059-b453-4a22-8030-8f50dbaf39f4	NCSC00088510		Plantae	Magnoliophyta		Malpighiales	Hypericaceae	Hypericum virginicum	L.	Hypericum	virginicum					Weakley, A.S. 2012 (working draft of 30 Nov 2012). Flora of the southern and mid-Atlantic states. Courtesy of the author, University of North Carolina, Chapel Hill.					Howell	HOLA-33	2014-05-26	2014	5	26	146			Occasional at this site; occasional in Carolina bay lakes	Coastal Plain Semipermanent Impoundment (Cypress-Gum Subtype) (Schafale 2012); Floating Bog (Schafale 2012)
7289470	NCSC		024f44f2-a2f5-4daa-b306-c11efb5aa4d0	PreservedSpecimen	4bbb0abe-e73b-421c-b358-4a0bc715798f	NCSC00088587		Plantae	Magnoliophyta		Poales	Cyperaceae	Dulichium arundinaceum	(L.) Britton	Dulichium	arundinaceum					Weakley, A.S. 2012 (working draft of 30 Nov 2012). Flora of the southern and mid-Atlantic states. Courtesy of the author, University of North Carolina, Chapel Hill.					Howell	HOLA-32	2014-05-26	2014	5	26	146			Occasional at this site; occasional in Carolina bay lakes	Coastal Plain Semipermanent Impoundment (Cypress-Gum Subtype) (Schafale 2012); Floating Bog (Schafale 2012)
7289471	NCSC		024f44f2-a2f5-4daa-b306-c11efb5aa4d0	PreservedSpecimen	eaa22c60-7d6e-4842-a7e6-cc80655c78e8	NCSC00088601		Plantae	Magnoliophyta		Myrtales	Lythraceae	Decodon verticillatus	(L.) Elliot	Decodon	verticillatus					Weakley, A.S. 2012 (working draft of 30 Nov 2012). Flora of the southern and mid-Atlantic states. Courtesy of the author, University of North Carolina, Chapel Hill.					Howell	HOLA-31	2014-05-26	2014	5	26	146			Occasional at this site; occasional in Carolina bay lakes	Coastal Plain Semipermanent Impoundment (Cypress-Gum Subtype) (Schafale 2012); Floating Bog (Schafale 2012)
7289472	NCSC		024f44f2-a2f5-4daa-b306-c11efb5aa4d0	PreservedSpecimen	4a582063-2585-4317-882b-294e712d911d	NCSC00088605		Plantae	Magnoliophyta		Asparagales	Orchidaceae	Pogonia ophioglossoides	(L.) Ker Gawl.	Pogonia	ophioglossoides					Weakley, A.S. 2012 (working draft of 30 Nov 2012). Flora of the southern and mid-Atlantic states. Courtesy of the author, University of North Carolina, Chapel Hill.					Howell			2014						Occasional at this site; rare in Carolina bay lakes			field values redacted: eventDate, month, day, startDayOfYear, recordNumber, locality, verbatimElevation, decimalLatitude, decimalLongitude, habitat
7289473	NCSC		024f44f2-a2f5-4daa-b306-c11efb5aa4d0	PreservedSpecimen	0320fe2d-ecfa-4725-a55c-11e807cf9463	NCSC00088613		Plantae	Magnoliophyta		Liliales	Smilacaceae	Smilax laurifolia	L.	Smilax	laurifolia					Weakley, A.S. 2012 (working draft of 30 Nov 2012). Flora of the southern and mid-Atlantic states. Courtesy of the author, University of North Carolina, Chapel Hill.					Howell	HOLA-3	2014-03-08	2014	3	8	67			Occasional at this site; frequent in Carolina bay lakes	Coastal Plain Semipermanent Impoundment (Cypress-Gum Subtype) (Schafale 2012); Floating Bog (Schafale 2012)
7289474	NCSC		024f44f2-a2f5-4daa-b306-c11efb5aa4d0	PreservedSpecimen	49e4ced5-52d2-40b1-93aa-d45a3a6056f6	NCSC00088614		Plantae	Magnoliophyta		Poales	Xyridaceae	Xyris		Xyris						Weakley, A.S. 2012 (working draft of 30 Nov 2012). Flora of the southern and mid-Atlantic states. Courtesy of the author, University of North Carolina, Chapel Hill.					Howell	HOLA-29	2014-05-26	2014	5	26	146			Abundant at this site; occasional in Carolina bay lakes	Coastal Plain Semipermanent Impoundment (Cypress-Gum Subtype) (Schafale 2012); Floating Bog (Schafale 2012)
7289475	NCSC		024f44f2-a2f5-4daa-b306-c11efb5aa4d0	PreservedSpecimen	916b8869-56db-48a8-b0b9-c7194bdea20f	NCSC00088588		Plantae	Magnoliophyta		Caryophyllales	Droseraceae	Drosera intermedia	Hayne	Drosera	intermedia					Weakley, A.S. 2012 (working draft of 30 Nov 2012). Flora of the southern and mid-Atlantic states. Courtesy of the author, University of North Carolina, Chapel Hill.					Howell			2014						Frequent at this site; infrequent in Carolina bay lakes			field values redacted: eventDate, month, day, startDayOfYear, recordNumber, locality, verbatimElevation, decimalLatitude, decimalLongitude, habitat
7289476	NCSC		024f44f2-a2f5-4daa-b306-c11efb5aa4d0	PreservedSpecimen	c9600757-542c-4bb4-93dd-6a2146334d53	NCSC00088600		Plantae	Magnoliophyta		Lamiales	Lentibulariaceae	Utricularia striata	Leconte ex Torr.	Utricularia	striata					Weakley, A.S. 2012 (working draft of 30 Nov 2012). Flora of the southern and mid-Atlantic states. Courtesy of the author, University of North Carolina, Chapel Hill.					Howell	HOLA-27	2014-05-26	2014	5	26	146			Occassional at this site; occasional in Carolina bay lakes	Floating Bog (Schafale 2012)
7289477	NCSC		024f44f2-a2f5-4daa-b306-c11efb5aa4d0	PreservedSpecimen	8153a5b6-ff64-4910-872c-0a2e866c7a41	NCSC00088583		Plantae	Magnoliophyta		Nymphaeales	Cabombaceae	Cabomba caroliniana	A. Gray	Cabomba	caroliniana					Weakley, A.S. 2012 (working draft of 30 Nov 2012). Flora of the southern and mid-Atlantic states. Courtesy of the author, University of North Carolina, Chapel Hill.					Howell	HOLA-26	2014-05-26	2014	5	26	146			Infrequent at this site; rare in Carolina bay lakes	Coastal Plain Semipermanent Impoundment (Cypress-Gum Subtype) (Schafale 2012)
7289478	NCSC		024f44f2-a2f5-4daa-b306-c11efb5aa4d0	PreservedSpecimen	9c292784-629a-4b9f-a912-c7deee644513	NCSC00088611		Plantae	Magnoliophyta		Liliales	Smilacaceae	Smilax walteri	Pursh	Smilax	walteri					Weakley, A.S. 2012 (working draft of 30 Nov 2012). Flora of the southern and mid-Atlantic states. Courtesy of the author, University of North Carolina, Chapel Hill.					Howell	HOLA-25	2014-05-26	2014	5	26	146			Occasional at this site; infrequent in Carolina bay lakes	Coastal Plain Semipermanent Impoundment (Cypress-Gum Subtype) (Schafale 2012); Floating Bog (Schafale 2012)
7289479	NCSC		024f44f2-a2f5-4daa-b306-c11efb5aa4d0	PreservedSpecimen	aa7ac01f-ca98-4863-850b-1b306210f522	NCSC00088604		Plantae	Magnoliophyta		Asparagales	Orchidaceae	Calopogon tuberosus	(L.) Britton, Sterns & Poggenb.	Calopogon	tuberosus					Weakley, A.S. 2012 (working draft of 30 Nov 2012). Flora of the southern and mid-Atlantic states. Courtesy of the author, University of North Carolina, Chapel Hill.					Howell			2014						Occasional at this site; rare in Carolina bay lakes			field values redacted: eventDate, month, day, startDayOfYear, recordNumber, locality, verbatimElevation, decimalLatitude, decimalLongitude, habitat
7289480	NCSC		024f44f2-a2f5-4daa-b306-c11efb5aa4d0	PreservedSpecimen	1e4de729-e4ed-44cd-9311-e79ab67d57e8	NCSC00088606		Plantae	Magnoliophyta		Poales	Poaceae	Panicum hemitomon	Schult.	Panicum	hemitomon					Weakley, A.S. 2012 (working draft of 30 Nov 2012). Flora of the southern and mid-Atlantic states. Courtesy of the author, University of North Carolina, Chapel Hill.					Howell	HOLA-23	2014-05-26	2014	5	26	146			Infrequent at this site; occasional in Carolina bay lakes	Coastal Plain Semipermanent Impoundment (Cypress-Gum Subtype) (Schafale 2012)
7289481	NCSC		024f44f2-a2f5-4daa-b306-c11efb5aa4d0	PreservedSpecimen	ac4824af-626b-44a8-bc7f-47eb87f56a3b	NCSC00088589		Plantae	Magnoliophyta		Ericales	Ericaceae	Zenobia pulverulenta	(Bartram ex Willd.) Pollard	Zenobia	pulverulenta					Weakley, A.S. 2012 (working draft of 30 Nov 2012). Flora of the southern and mid-Atlantic states. Courtesy of the author, University of North Carolina, Chapel Hill.					Howell	HOLA-22	2014-05-06	2014	5	6	126			Occasional at this site; occasional in Carolina bay lakes	Coastal Plain Semipermanent Impoundment (Cypress-Gum Subtype) (Schafale 2012); Floating Bog (Schafale 2012)
7289482	NCSC		024f44f2-a2f5-4daa-b306-c11efb5aa4d0	PreservedSpecimen	30703536-4934-4e90-a4fc-b0c208b95d11	NCSC00088612		Plantae	Magnoliophyta		Liliales	Smilacaceae	Smilax walteri	Pursh	Smilax	walteri					Weakley, A.S. 2012 (working draft of 30 Nov 2012). Flora of the southern and mid-Atlantic states. Courtesy of the author, University of North Carolina, Chapel Hill.					Howell	HOLA-21	2014-05-06	2014	5	6	126			Occasional at this site; infrequent in Carolina bay lakes	Coastal Plain Semipermanent Impoundment (Cypress-Gum Subtype) (Schafale 2012); Floating Bog (Schafale 2012)
7289483	NCSC		024f44f2-a2f5-4daa-b306-c11efb5aa4d0	PreservedSpecimen	fea74d42-a6c7-4a47-bb88-c6a3568e42ba	NCSC00088607		Plantae	Magnoliophyta		Sapindales	Sapindaceae	Acer rubrum	Wats.	Acer	rubrum					Weakley, A.S. 2012 (working draft of 30 Nov 2012). Flora of the southern and mid-Atlantic states. Courtesy of the author, University of North Carolina, Chapel Hill.					Howell	HOLA-20	2014-05-06	2014	5	6	126			Occasional at this site; frequent in Carolina bay lakes	Coastal Plain Semipermanent Impoundment (Cypress-Gum Subtype) (Schafale 2012); Floating Bog (Schafale 2012)
7289484	NCSC		024f44f2-a2f5-4daa-b306-c11efb5aa4d0	PreservedSpecimen	b0fbd636-4f67-4014-997b-029873447c22	NCSC00088584		Plantae	Coniferophyta		Pinales	Cupressaceae	Chamaecyparis thyoides	(L.) Britton, Sterns & Poggenb.	Chamaecyparis	thyoides					Weakley, A.S. 2012 (working draft of 30 Nov 2012). Flora of the southern and mid-Atlantic states. Courtesy of the author, University of North Carolina, Chapel Hill.					Howell	HOLA-2	2014-03-08	2014	3	8	67			Occasional at this site; occasional in Carolina bay lakes	Coastal Plain Semipermanent Impoundment (Cypress-Gum Subtype) (Schafale 2012); Floating Bog (Schafale 2012)
7289485	NCSC		024f44f2-a2f5-4daa-b306-c11efb5aa4d0	PreservedSpecimen	60608eb4-d37b-425d-9389-019ebdcc1b0e	NCSC00088599		Plantae	Magnoliophyta		Lamiales	Lentibulariaceae	Utricularia gibba	Le Conte	Utricularia	gibba					Weakley, A.S. 2012 (working draft of 30 Nov 2012). Flora of the southern and mid-Atlantic states. Courtesy of the author, University of North Carolina, Chapel Hill.					Howell	HOLA-19	2014-05-06	2014	5	6	126			Occasional at this site; rare in Carolina bay lakes	Coastal Plain Semipermanent Impoundment (Cypress-Gum Subtype) (Schafale 2012)
7289486	NCSC		024f44f2-a2f5-4daa-b306-c11efb5aa4d0	PreservedSpecimen	cf1115ba-a6b2-4bb0-bfc8-68548e91c315	NCSC00088602		Plantae	Magnoliophyta		Nymphaeales	Nymphaeaceae	Nymphaea odorata	Ait.	Nymphaea	odorata					Weakley, A.S. 2012 (working draft of 30 Nov 2012). Flora of the southern and mid-Atlantic states. Courtesy of the author, University of North Carolina, Chapel Hill.					Howell	HOLA-18	2014-05-06	2014	5	6	126			Frequent at this site; infrequent in Carolina bay lakes	Coastal Plain Semipermanent Impoundment (Cypress-Gum Subtype) (Schafale 2012); Floating Bog (Schafale 2012)
7289487	NCSC		024f44f2-a2f5-4daa-b306-c11efb5aa4d0	PreservedSpecimen	fb914a3d-bc60-4366-9295-3c1935b0b797	NCSC00088590		Plantae	Magnoliophyta		Ericales	Ericaceae	Zenobia pulverulenta	(Bartram ex Willd.) Pollard	Zenobia	pulverulenta					Weakley, A.S. 2012 (working draft of 30 Nov 2012). Flora of the southern and mid-Atlantic states. Courtesy of the author, University of North Carolina, Chapel Hill.					Howell	HOLA-17	2014-05-06	2014	5	6	126			Occasional at this site; occasional in Carolina bay lakes	Coastal Plain Semipermanent Impoundment (Cypress-Gum Subtype) (Schafale 2012); Floating Bog (Schafale 2012)
7289488	NCSC		024f44f2-a2f5-4daa-b306-c11efb5aa4d0	PreservedSpecimen	d61acde3-2d21-4349-8afa-fdd69223d21b	NCSC00088609		Plantae	Magnoliophyta		Ericales	Sarraceniaceae	Sarracenia flava	L.	Sarracenia	flava					Weakley, A.S. 2012 (working draft of 30 Nov 2012). Flora of the southern and mid-Atlantic states. Courtesy of the author, University of North Carolina, Chapel Hill.					Howell			2014						Abundant at this site; rare in Carolina bay lakes			field values redacted: eventDate, month, day, startDayOfYear, recordNumber, locality, verbatimElevation, decimalLatitude, decimalLongitude, habitat
7289489	NCSC		024f44f2-a2f5-4daa-b306-c11efb5aa4d0	PreservedSpecimen	bc75a73e-9850-4f5c-b625-5b6409e4a11b	NCSC00088603		Plantae	Magnoliophyta		Cornales	Nyssaceae	Nyssa biflora	Walter	Nyssa	biflora					Weakley, A.S. 2012 (working draft of 30 Nov 2012). Flora of the southern and mid-Atlantic states. Courtesy of the author, University of North Carolina, Chapel Hill.					Howell	HOLA-15	2014-05-06	2014	5	6	126			Occasional at this site; frequent in Carolina bay lakes	Coastal Plain Semipermanent Impoundment (Cypress-Gum Subtype) (Schafale 2012)
7289490	NCSC		024f44f2-a2f5-4daa-b306-c11efb5aa4d0	PreservedSpecimen	8e1ba615-5532-4bf2-9844-ebd39d6e67db	NCSC00088598		Plantae	Magnoliophyta		Poales	Juncaceae	Juncus repens	Michx.	Juncus	repens					Weakley, A.S. 2012 (working draft of 30 Nov 2012). Flora of the southern and mid-Atlantic states. Courtesy of the author, University of North Carolina, Chapel Hill.					Howell	HOLA-14	2014-05-06	2014	5	6	126			Occasional at this site; frequent in Carolina bay lakes	Coastal Plain Semipermanent Impoundment (Cypress-Gum Subtype) (Schafale 2012)
7289491	NCSC		024f44f2-a2f5-4daa-b306-c11efb5aa4d0	PreservedSpecimen	8d3ad0ca-2eed-4fde-9952-f1db152df19f	NCSC00088586		Plantae	Coniferophyta		Pinales	Cupressaceae	Chamaecyparis thyoides	(L.) Britton, Sterns & Poggenb.	Chamaecyparis	thyoides					Weakley, A.S. 2012 (working draft of 30 Nov 2012). Flora of the southern and mid-Atlantic states. Courtesy of the author, University of North Carolina, Chapel Hill.					Howell	HOLA-13	2014-05-06	2014	5	6	126			Occasional at this site; occasional in Carolina bay lakes	Coastal Plain Semipermanent Impoundment (Cypress-Gum Subtype) (Schafale 2012); Floating Bog (Schafale 2012)
7289492	NCSC		024f44f2-a2f5-4daa-b306-c11efb5aa4d0	PreservedSpecimen	8052576e-6398-4b7a-9881-adc57410274a	NCSC00088591		Plantae	Magnoliophyta		Ericales	Ericaceae	Eubotrys racemosa	(L.) Nutt.	Eubotrys	racemosa					Weakley, A.S. 2012 (working draft of 30 Nov 2012). Flora of the southern and mid-Atlantic states. Courtesy of the author, University of North Carolina, Chapel Hill.					Howell	HOLA-12	2014-05-06	2014	5	6	126			Occasional at this site; occasional in Carolina bay lakes	Coastal Plain Semipermanent Impoundment (Cypress-Gum Subtype) (Schafale 2012)
7289493	NCSC		024f44f2-a2f5-4daa-b306-c11efb5aa4d0	PreservedSpecimen	dc446bb5-a896-4bc2-8cbe-8aff42f5c87a	NCSC00088610		Plantae	Magnoliophyta		Liliales	Smilacaceae	Smilax walteri	Pursh	Smilax	walteri					Weakley, A.S. 2012 (working draft of 30 Nov 2012). Flora of the southern and mid-Atlantic states. Courtesy of the author, University of North Carolina, Chapel Hill.					Howell	HOLA-11	2014-05-06	2014	5	6	126			Occasional at this site; infrequent in Carolina bay lakes	Coastal Plain Semipermanent Impoundment (Cypress-Gum Subtype) (Schafale 2012); Floating Bog (Schafale 2012)
7289494	NCSC		024f44f2-a2f5-4daa-b306-c11efb5aa4d0	PreservedSpecimen	0ef89240-4357-41e5-9931-44c61b139200	NCSC00088585		Plantae	Coniferophyta		Pinales	Cupressaceae	Taxodium ascendens	Brongn.	Taxodium	ascendens					Weakley, A.S. 2012 (working draft of 30 Nov 2012). Flora of the southern and mid-Atlantic states. Courtesy of the author, University of North Carolina, Chapel Hill.					Howell	HOLA-10	2014-05-06	2014	5	6	126			Abundant at this site; abundant in Carolina bay lakes	Coastal Plain Semipermanent Impoundment (Cypress-Gum Subtype) (Schafale 2012)
7289495	NCSC		024f44f2-a2f5-4daa-b306-c11efb5aa4d0	PreservedSpecimen	8ae74423-49a1-4453-a45a-596d68a6071c	NCSC00088594		Plantae	Magnoliophyta		Ericales	Ericaceae	Chamaedaphne calyculata	Moench	Chamaedaphne	calyculata					Weakley, A.S. 2012 (working draft of 30 Nov 2012). Flora of the southern and mid-Atlantic states. Courtesy of the author, University of North Carolina, Chapel Hill.					Howell	HOLA-1	2014-03-08	2014	3	8	67			Occasional at this site; occasional in Carolina bay lakes	Coastal Plain Semipermanent Impoundment (Cypress-Gum Subtype) (Schafale 2012); Floating Bog (Schafale 2012)
7289496	NCSC		024f44f2-a2f5-4daa-b306-c11efb5aa4d0	PreservedSpecimen	0f95f396-05e0-44f4-a857-a2902ef7e137	NCSC00088581		Plantae	Magnoliophyta		Malpighiales	Hypericaceae	Hypericum virginicum	L.	Hypericum	virginicum					Weakley, A.S. 2012 (working draft of 30 Nov 2012). Flora of the southern and mid-Atlantic states. Courtesy of the author, University of North Carolina, Chapel Hill.					Howell	BATR-9	2014-05-10	2014	5	10	130			Occasional at this site; occasional in Carolina bay lakes	Littoral Zone
7289497	NCSC		024f44f2-a2f5-4daa-b306-c11efb5aa4d0	PreservedSpecimen	37dbefb0-bbad-4102-bd84-eba09f4224db	NCSC00088559		Plantae	Magnoliophyta		Poales	Juncaceae	Juncus repens	Michx.	Juncus	repens					Weakley, A.S. 2012 (working draft of 30 Nov 2012). Flora of the southern and mid-Atlantic states. Courtesy of the author, University of North Carolina, Chapel Hill.					Howell	BATR-8	2014-05-10	2014	5	10	130			Occasional at this site; frequent in Carolina bay lakes	Littoral Zone
7289498	NCSC		024f44f2-a2f5-4daa-b306-c11efb5aa4d0	PreservedSpecimen	45f12f6e-c6d8-4d84-83e1-ec5c17a735aa	NCSC00088565		Plantae	Coniferophyta		Pinales	Cupressaceae	Taxodium ascendens	Brongn.	Taxodium	ascendens					Weakley, A.S. 2012 (working draft of 30 Nov 2012). Flora of the southern and mid-Atlantic states. Courtesy of the author, University of North Carolina, Chapel Hill.					Howell	BATR-7	2014-05-10	2014	5	10	130			Abundant at this site; abundant in Carolina bay lakes	Littoral Zone
7289499	NCSC		024f44f2-a2f5-4daa-b306-c11efb5aa4d0	PreservedSpecimen	8c3a15f2-88eb-4195-9076-04ba62a4e443	NCSC00088132		Plantae	Magnoliophyta		Poales	Poaceae	Coleataenia longifolia	(Torr.) Soreng	Coleataenia	longifolia					Weakley, A.S. 2012 (working draft of 30 Nov 2012). Flora of the southern and mid-Atlantic states. Courtesy of the author, University of North Carolina, Chapel Hill.					Howell	BATR-68	2014-10-11	2014	10	11	284			Rare at this site; rare in Carolina bay lakes	Littoral Zone
7289500	NCSC		024f44f2-a2f5-4daa-b306-c11efb5aa4d0	PreservedSpecimen	fed1654b-4309-4633-b83f-9c2222da5beb	NCSC00088537		Plantae	Magnoliophyta		Poales	Poaceae	Eragrostis elliottii	S. Watson	Eragrostis	elliottii					Weakley, A.S. 2012 (working draft of 30 Nov 2012). Flora of the southern and mid-Atlantic states. Courtesy of the author, University of North Carolina, Chapel Hill.					Howell	BATR-67	2014-10-11	2014	10	11	284			Rare at this site; rare in Carolina bay lakes	Littoral Zone
7289501	NCSC		024f44f2-a2f5-4daa-b306-c11efb5aa4d0	PreservedSpecimen	16c04dc4-d8e8-4749-aa5b-d55c56516c10	NCSC00088556		Plantae	Magnoliophyta		Poales	Juncaceae	Juncus scirpoides	Lam.	Juncus	scirpoides					Weakley, A.S. 2012 (working draft of 30 Nov 2012). Flora of the southern and mid-Atlantic states. Courtesy of the author, University of North Carolina, Chapel Hill.					Howell	BATR-66	2014-10-11	2014	10	11	284			Infrequent at this site; infrequent in Carolina bay lakes	Littoral Zone
7289502	NCSC		024f44f2-a2f5-4daa-b306-c11efb5aa4d0	PreservedSpecimen	77d31de0-9adf-4a6a-8aca-62a8e973b16d	NCSC00088546		Plantae	Magnoliophyta		Asterales	Asteraceae	Solidago fistulosa	Mill.	Solidago	fistulosa					Weakley, A.S. 2012 (working draft of 30 Nov 2012). Flora of the southern and mid-Atlantic states. Courtesy of the author, University of North Carolina, Chapel Hill.					Howell	BATR-65	2014-10-11	2014	10	11	284			Rare at this site; rare in Carolina bay lakes	Littoral Zone
7289503	NCSC		024f44f2-a2f5-4daa-b306-c11efb5aa4d0	PreservedSpecimen	0ae01930-fc6b-4351-be45-31896a7b48f3	NCSC00088545		Plantae	Magnoliophyta		Asterales	Asteraceae	Solidago fistulosa	Mill.	Solidago	fistulosa					Weakley, A.S. 2012 (working draft of 30 Nov 2012). Flora of the southern and mid-Atlantic states. Courtesy of the author, University of North Carolina, Chapel Hill.					Howell	BATR-64	2014-10-11	2014	10	11	284			Rare at this site; rare in Carolina bay lakes	Littoral Zone
7289504	NCSC		024f44f2-a2f5-4daa-b306-c11efb5aa4d0	PreservedSpecimen	59e4c6e8-fa09-4d76-9177-eb4396f4e699	NCSC00088570		Plantae	Magnoliophyta		Poales	Cyperaceae	Cyperus odoratus	L.	Cyperus	odoratus					Weakley, A.S. 2012 (working draft of 30 Nov 2012). Flora of the southern and mid-Atlantic states. Courtesy of the author, University of North Carolina, Chapel Hill.					Howell	BATR-63	2014-10-11	2014	10	11	284			Rare at this site; rare in Carolina bay lakes	Littoral Zone
7289505	NCSC		024f44f2-a2f5-4daa-b306-c11efb5aa4d0	PreservedSpecimen	395ace55-eb71-44a4-b5f5-8ca056605670	NCSC00088569		Plantae	Magnoliophyta		Poales	Cyperaceae	Fuirena pumila	(Torr.) Spreng.	Fuirena	pumila					Weakley, A.S. 2012 (working draft of 30 Nov 2012). Flora of the southern and mid-Atlantic states. Courtesy of the author, University of North Carolina, Chapel Hill.					Howell	BATR-62	2014-10-11	2014	10	11	284			Rare at this site; rare in Carolina bay lakes	Littoral Zone
7289506	NCSC		024f44f2-a2f5-4daa-b306-c11efb5aa4d0	PreservedSpecimen	4d04836f-563b-4612-9ec6-aa738055d14a	NCSC00088555		Plantae	Magnoliophyta		Poales	Juncaceae	Juncus pelocarpus	E. Mey.	Juncus	pelocarpus					Weakley, A.S. 2012 (working draft of 30 Nov 2012). Flora of the southern and mid-Atlantic states. Courtesy of the author, University of North Carolina, Chapel Hill.					Howell	BATR-61	2014-10-11	2014	10	11	284			Frequent at this site; frequent in Carolina bay lakes	Littoral Zone
7289507	NCSC		024f44f2-a2f5-4daa-b306-c11efb5aa4d0	PreservedSpecimen	5c736dae-f8d5-4b78-8ab0-627963f17dee	NCSC00088573		Plantae	Magnoliophyta		Ericales	Cyrillaceae	Cyrilla racemiflora	L.	Cyrilla	racemiflora					Weakley, A.S. 2012 (working draft of 30 Nov 2012). Flora of the southern and mid-Atlantic states. Courtesy of the author, University of North Carolina, Chapel Hill.					Howell	BATR-60	2014-10-11	2014	10	11	284			Frequent at this site; frequent in Carolina bay lakes	Littoral Zone
7289508	NCSC		024f44f2-a2f5-4daa-b306-c11efb5aa4d0	PreservedSpecimen	879501fd-adfb-48c7-aaa0-e07a8e08012e	NCSC00088560		Plantae	Magnoliophyta		Poales	Juncaceae	Juncus effusus	L.	Juncus	effusus					Weakley, A.S. 2012 (working draft of 30 Nov 2012). Flora of the southern and mid-Atlantic states. Courtesy of the author, University of North Carolina, Chapel Hill.					Howell	BATR-6	2014-05-10	2014	5	10	130			Occasional at this site; infrequent in Carolina bay lakes	Littoral Zone
7289509	NCSC		024f44f2-a2f5-4daa-b306-c11efb5aa4d0	PreservedSpecimen	035474f0-ebc0-4035-a42a-336042defa5d	NCSC00088541		Plantae	Magnoliophyta		Aquifoliales	Aquifoliaceae	Ilex glabra	(L.) A. Gray	Ilex	glabra					Weakley, A.S. 2012 (working draft of 30 Nov 2012). Flora of the southern and mid-Atlantic states. Courtesy of the author, University of North Carolina, Chapel Hill.					Howell	BATR-59	2014-10-11	2014	10	11	284			Rare at this site; infrequent in Carolina bay lakes	Littoral Zone
7289510	NCSC		024f44f2-a2f5-4daa-b306-c11efb5aa4d0	PreservedSpecimen	858448b8-2a20-4aca-85d6-ba1c4e575ec0	NCSC00088568		Plantae	Magnoliophyta		Poales	Cyperaceae	Scirpus cyperinus	(L.) Kunth	Scirpus	cyperinus					Weakley, A.S. 2012 (working draft of 30 Nov 2012). Flora of the southern and mid-Atlantic states. Courtesy of the author, University of North Carolina, Chapel Hill.					Howell	BATR-58	2014-10-11	2014	10	11	284			Occasional at this site; occasional in Carolina bay lakes	Littoral Zone
7289511	NCSC		024f44f2-a2f5-4daa-b306-c11efb5aa4d0	PreservedSpecimen	50076711-34a1-4fb6-8f0a-63fa46679261	NCSC00088143		Plantae	Magnoliophyta		Myrtales	Melastomataceae	Rhexia nashii	Small	Rhexia	nashii					Weakley, A.S. 2012 (working draft of 30 Nov 2012). Flora of the southern and mid-Atlantic states. Courtesy of the author, University of North Carolina, Chapel Hill.					Howell	BATR-57	2014-10-11	2014	10	11	284			Occasional at this site; occasional in Carolina bay lakes	Littoral Zone
7289512	NCSC		024f44f2-a2f5-4daa-b306-c11efb5aa4d0	PreservedSpecimen	b9e1f671-0536-44b2-b4d3-20bd03551363	NCSC00088582		Plantae	Magnoliophyta		Malpighiales	Hypericaceae	Hypericum virginicum	L.	Hypericum	virginicum					Weakley, A.S. 2012 (working draft of 30 Nov 2012). Flora of the southern and mid-Atlantic states. Courtesy of the author, University of North Carolina, Chapel Hill.					Howell	BATR-56	2014-10-11	2014	10	11	284			Occasional at this site; occasional in Carolina bay lakes	Littoral Zone
7289513	NCSC		024f44f2-a2f5-4daa-b306-c11efb5aa4d0	PreservedSpecimen	413bb8df-6998-49a4-ab5a-2ee68afd08a5	NCSC00088133		Plantae	Magnoliophyta		Poales	Poaceae	Sacciolepis striata	(L.) Nash	Sacciolepis	striata					Weakley, A.S. 2012 (working draft of 30 Nov 2012). Flora of the southern and mid-Atlantic states. Courtesy of the author, University of North Carolina, Chapel Hill.					Howell	BATR-55	2014-10-11	2014	10	11	284			Occasional at this site; occasional in Carolina bay lakes	Littoral Zone
7289514	NCSC		024f44f2-a2f5-4daa-b306-c11efb5aa4d0	PreservedSpecimen	949e886d-0d09-4bc2-91dd-20c28d8ca3c6	NCSC00088134		Plantae	Magnoliophyta		Poales	Poaceae	Sacciolepis striata	(L.) Nash	Sacciolepis	striata					Weakley, A.S. 2012 (working draft of 30 Nov 2012). Flora of the southern and mid-Atlantic states. Courtesy of the author, University of North Carolina, Chapel Hill.					Howell	BATR-54	2014-10-11	2014	10	11	284			Occasional at this site; occasional in Carolina bay lakes	Littoral Zone
7289515	NCSC		024f44f2-a2f5-4daa-b306-c11efb5aa4d0	PreservedSpecimen	dac56618-7a82-4213-bef6-0fc3662a0da1	NCSC00088135		Plantae	Magnoliophyta		Poales	Poaceae	Panicum verrucosum	Muhl.	Panicum	verrucosum					Weakley, A.S. 2012 (working draft of 30 Nov 2012). Flora of the southern and mid-Atlantic states. Courtesy of the author, University of North Carolina, Chapel Hill.					Howell	BATR-53	2014-10-11	2014	10	11	284			Infrequent at this site; occasional in Carolina bay lakes	Littoral Zone
7289516	NCSC		024f44f2-a2f5-4daa-b306-c11efb5aa4d0	PreservedSpecimen	c3c94f5a-044d-4a98-8567-ec88affc7183	NCSC00088138		Plantae	Magnoliophyta		Poales	Poaceae	Dichanthelium portoricense	(Ham.) B.F.Hansen & Wunderlin	Dichanthelium	portoricense					Weakley, A.S. 2012 (working draft of 30 Nov 2012). Flora of the southern and mid-Atlantic states. Courtesy of the author, University of North Carolina, Chapel Hill.					Howell	BATR-52	2014-07-09	2014	7	9	190			Rare at this site; rare in Carolina bay lakes	Littoral Zone
7289517	NCSC		024f44f2-a2f5-4daa-b306-c11efb5aa4d0	PreservedSpecimen	a7842cb0-4bcd-4777-b2fd-de262a595d4b	NCSC00088580		Plantae	Magnoliophyta		Commelinales	Haemodoraceae	Lachnanthes caroliniana	(Lam.) Dandy	Lachnanthes	caroliniana					Weakley, A.S. 2012 (working draft of 30 Nov 2012). Flora of the southern and mid-Atlantic states. Courtesy of the author, University of North Carolina, Chapel Hill.					Howell	BATR-51	2014-06-23	2014	6	23	174			Infrequent at this site; occasional in Carolina bay lakes.	Littoral Zone
7289518	NCSC		024f44f2-a2f5-4daa-b306-c11efb5aa4d0	PreservedSpecimen	a41f3102-75c9-4cbf-a411-e62d902d8f12	NCSC00088579		Plantae	Magnoliophyta		Commelinales	Haemodoraceae	Lachnanthes caroliniana	(Lam.) Dandy	Lachnanthes	caroliniana					Weakley, A.S. 2012 (working draft of 30 Nov 2012). Flora of the southern and mid-Atlantic states. Courtesy of the author, University of North Carolina, Chapel Hill.					Howell	BATR-50	2014-06-23	2014	6	23	174			Infrequent at this site; occasional in Carolina bay lakes	Littoral Zone
7289519	NCSC		024f44f2-a2f5-4daa-b306-c11efb5aa4d0	PreservedSpecimen	4d63ce2d-4de1-46e0-8810-ea4f18a61d02	NCSC00088550		Plantae	Pteridophyta	Polypodiopsida	Polypodiales	Blechnaceae	Lorinseria aereolata	(L.) T. Moore							Weakley, A.S. 2012 (working draft of 30 Nov 2012). Flora of the southern and mid-Atlantic states. Courtesy of the author, University of North Carolina, Chapel Hill.					Howell	BATR-5	2014-05-10	2014	5	10	130			Occasional at this site; occasional in Carolina bay lakes	Littoral Zone
7289520	NCSC		024f44f2-a2f5-4daa-b306-c11efb5aa4d0	PreservedSpecimen	3c54f879-0508-4481-997e-27a18175c3a7	NCSC00088553		Plantae	Magnoliophyta		Poales	Bromeliaceae	Tillandsia usneoides	L.	Tillandsia	usneoides					Weakley, A.S. 2012 (working draft of 30 Nov 2012). Flora of the southern and mid-Atlantic states. Courtesy of the author, University of North Carolina, Chapel Hill.					Howell	BATR-49	2014-06-23	2014	6	23	174			Frequent at this site; frequent in Carolina bay lakes	Littoral Zone
7289521	NCSC		024f44f2-a2f5-4daa-b306-c11efb5aa4d0	PreservedSpecimen	033beac0-224e-4966-92f3-395127e30a4d	NCSC00088140		Plantae	Magnoliophyta		Cornales	Nyssaceae	Nyssa biflora	Walter	Nyssa	biflora					Weakley, A.S. 2012 (working draft of 30 Nov 2012). Flora of the southern and mid-Atlantic states. Courtesy of the author, University of North Carolina, Chapel Hill.					Howell	BATR-48	2014-06-23	2014	6	23	174			Occasional at this site; frequent in Carolina bay lakes	Littoral Zone
7289522	NCSC		024f44f2-a2f5-4daa-b306-c11efb5aa4d0	PreservedSpecimen	6ace56ac-5e91-4c48-aa37-ea1af63d7cfc	NCSC00088538		Plantae	Magnoliophyta		Saxifragales	Altingiaceae	Liquidambar styraciflua	L.	Liquidambar	styraciflua					Weakley, A.S. 2012 (working draft of 30 Nov 2012). Flora of the southern and mid-Atlantic states. Courtesy of the author, University of North Carolina, Chapel Hill.					Howell	BATR-47	2014-06-23	2014	6	23	174			Infrequent at this site; infrequent in Carolina bay lakes	Littoral Zone
7289523	NCSC		024f44f2-a2f5-4daa-b306-c11efb5aa4d0	PreservedSpecimen	d9f08e61-2e38-4851-9d50-cd8807dc90c7	NCSC00088123		Plantae	Magnoliophyta		Vitales	Vitaceae	Muscadinia rotundifolia	(Michx.) Small	Muscadinia	rotundifolia					Weakley, A.S. 2012 (working draft of 30 Nov 2012). Flora of the southern and mid-Atlantic states. Courtesy of the author, University of North Carolina, Chapel Hill.					Howell	BATR-46	2014-06-23	2014	6	23	174			Occasional at this site; occasional in Carolina bay lakes	Littoral Zone
7289524	NCSC		024f44f2-a2f5-4daa-b306-c11efb5aa4d0	PreservedSpecimen	0aec2136-af3f-4a23-b776-6b54d56ab722	NCSC00088542		Plantae	Magnoliophyta		Apiales	Araliaceae	Hydrocotyle umbellata	L.	Hydrocotyle	umbellata					Weakley, A.S. 2012 (working draft of 30 Nov 2012). Flora of the southern and mid-Atlantic states. Courtesy of the author, University of North Carolina, Chapel Hill.					Howell	BATR-45	2014-06-23	2014	6	23	174			Rare at this site; infrequent in Carolina bay lakes	Littoral Zone
7289525	NCSC		024f44f2-a2f5-4daa-b306-c11efb5aa4d0	PreservedSpecimen	5b1b9e2b-4748-4012-8083-7fd14e07895b	NCSC00088125		Plantae	Magnoliophyta		Liliales	Smilacaceae	Smilax laurifolia	L.	Smilax	laurifolia					Weakley, A.S. 2012 (working draft of 30 Nov 2012). Flora of the southern and mid-Atlantic states. Courtesy of the author, University of North Carolina, Chapel Hill.					Howell	BATR-44	2014-06-23	2014	6	23	174			Occasional at this site; frequent in Carolina bay lakes	Littoral Zone
7289526	NCSC		024f44f2-a2f5-4daa-b306-c11efb5aa4d0	PreservedSpecimen	29e4bf70-c35a-47cc-b660-5302c0b0ccc9	NCSC00088137		Plantae	Magnoliophyta		Poales	Poaceae	Sacciolepis striata	(L.) Nash	Sacciolepis	striata					Weakley, A.S. 2012 (working draft of 30 Nov 2012). Flora of the southern and mid-Atlantic states. Courtesy of the author, University of North Carolina, Chapel Hill.					Howell	BATR-43	2014-06-23	2014	6	23	174			Occasional at this site; occasional in Carolina bay lakes	Littoral Zone
7289527	NCSC		024f44f2-a2f5-4daa-b306-c11efb5aa4d0	PreservedSpecimen	0d3ef9ef-5e92-40a3-af8c-bf2c8e291163	NCSC00088144						Lemtibulariaceae	Utricularia striata	Leconte ex Torr.	Utricularia	striata					Weakley, A.S. 2012 (working draft of 30 Nov 2012). Flora of the southern and mid-Atlantic states. Courtesy of the author, University of North Carolina, Chapel Hill.					Howell	BATR-42	2014-06-23	2014	6	23	174			Occasional at this site; occasional in Carolina bay lakes	Littoral Zone
7289528	NCSC		024f44f2-a2f5-4daa-b306-c11efb5aa4d0	PreservedSpecimen	a50fcd83-4518-4be5-9150-cdb3781a2b1a	NCSC00088572		Plantae	Magnoliophyta		Ericales	Cyrillaceae	Cyrilla racemiflora	L.	Cyrilla	racemiflora					Weakley, A.S. 2012 (working draft of 30 Nov 2012). Flora of the southern and mid-Atlantic states. Courtesy of the author, University of North Carolina, Chapel Hill.					Howell	BATR-41	2014-06-23	2014	6	23	174			Frequent at this site; frequent in Carolina bay lakes	Littoral Zone
7289529	NCSC		024f44f2-a2f5-4daa-b306-c11efb5aa4d0	PreservedSpecimen	dc8ae81d-1ade-4b21-a1ab-3c946419deb1	NCSC00088567		Plantae	Magnoliophyta		Poales	Cyperaceae	Eleocharis baldwinii	(Torr.) Chapm.	Eleocharis	baldwinii					Weakley, A.S. 2012 (working draft of 30 Nov 2012). Flora of the southern and mid-Atlantic states. Courtesy of the author, University of North Carolina, Chapel Hill.					Howell	BATR-40	2014-06-23	2014	6	23	174			Infrequent at this site; infrequent in carolina bay lakes	Littoral Zone
7289530	NCSC		024f44f2-a2f5-4daa-b306-c11efb5aa4d0	PreservedSpecimen	4318735d-bd44-47a4-9411-687b56a570bb	NCSC00088549		Plantae	Pteridophyta	Polypodiopsida	Polypodiales	Blechnaceae	Anchistea virginica	C.Presl	Anchistea	virginica					Weakley, A.S. 2012 (working draft of 30 Nov 2012). Flora of the southern and mid-Atlantic states. Courtesy of the author, University of North Carolina, Chapel Hill.					Howell	BATR-4	2014-05-10	2014	5	10	130			Occasional at this site; occasional in Carolina bay lakes	Littoral Zone
7289531	NCSC		024f44f2-a2f5-4daa-b306-c11efb5aa4d0	PreservedSpecimen	10dedfbb-5225-40ea-aa8b-cc0cd629b66d	NCSC00088142		Plantae	Magnoliophyta		Myrtales	Melastomataceae	Rhexia nashii	Small	Rhexia	nashii					Weakley, A.S. 2012 (working draft of 30 Nov 2012). Flora of the southern and mid-Atlantic states. Courtesy of the author, University of North Carolina, Chapel Hill.					Howell	BATR-39	2014-06-23	2014	6	23	174			Occasional at this site; occasional in Carolina bay lakes	Littoral Zone
7289532	NCSC		024f44f2-a2f5-4daa-b306-c11efb5aa4d0	PreservedSpecimen	d4328d48-f6ed-4dd6-a064-784c92dadec2	NCSC00088571		Plantae	Magnoliophyta		Ericales	Cyrillaceae	Cyrilla racemiflora	L.	Cyrilla	racemiflora					Weakley, A.S. 2012 (working draft of 30 Nov 2012). Flora of the southern and mid-Atlantic states. Courtesy of the author, University of North Carolina, Chapel Hill.					Howell	BATR-38	2014-06-23	2014	6	23	174			Frequent at this site; frequent in Carolina bay lakes	Littoral Zone
7289533	NCSC		024f44f2-a2f5-4daa-b306-c11efb5aa4d0	PreservedSpecimen	c43dc519-4525-4f9c-98ec-f487d973eafb	NCSC00088576		Plantae	Magnoliophyta		Fabales	Fabaceae	Wisteria frutescens	(L.) Poir.	Wisteria	frutescens					Weakley, A.S. 2012 (working draft of 30 Nov 2012). Flora of the southern and mid-Atlantic states. Courtesy of the author, University of North Carolina, Chapel Hill.					Howell	BATR-37	2014-06-09	2014	6	9	160			Occasional at this site; occasional in Carolina bay lakes	Littoral Zone
7289534	NCSC		024f44f2-a2f5-4daa-b306-c11efb5aa4d0	PreservedSpecimen	9b6d2e01-40a4-4f90-a11a-91337e6b8c99	NCSC00088561		Plantae	Magnoliophyta		Poales	Cyperaceae	Eleocharis baldwinii	(Torr.) Chapm.	Eleocharis	baldwinii					Weakley, A.S. 2012 (working draft of 30 Nov 2012). Flora of the southern and mid-Atlantic states. Courtesy of the author, University of North Carolina, Chapel Hill.					Howell	BATR-36	2014-06-09	2014	6	9	160			Infrequent at this site; infrequent in carolina bay lakes	Littoral Zone
7289535	NCSC		024f44f2-a2f5-4daa-b306-c11efb5aa4d0	PreservedSpecimen	929449c7-8c2b-452e-9270-d39e2319a672	NCSC00088554		Plantae	Magnoliophyta		Lamiales	Lentibulariaceae	Utricularia striata	Leconte ex Torr.	Utricularia	striata					Weakley, A.S. 2012 (working draft of 30 Nov 2012). Flora of the southern and mid-Atlantic states. Courtesy of the author, University of North Carolina, Chapel Hill.					Howell	BATR-35	2014-06-09	2014	6	9	160			Occasional at this site; occasional in Carolina bay lakes	Littoral Zone
7289536	NCSC		024f44f2-a2f5-4daa-b306-c11efb5aa4d0	PreservedSpecimen	f5dbb156-58f5-437c-a4b4-21c2568191a7	NCSC00088566		Plantae	Magnoliophyta		Poales	Cyperaceae	Carex longii	Mack.	Carex	longii					Weakley, A.S. 2012 (working draft of 30 Nov 2012). Flora of the southern and mid-Atlantic states. Courtesy of the author, University of North Carolina, Chapel Hill.					Howell	BATR-34	2014-06-09	2014	6	9	160			Rare at this site; infrequent in Carolina bay lakes	Littoral Zone
7289537	NCSC		024f44f2-a2f5-4daa-b306-c11efb5aa4d0	PreservedSpecimen	c1258736-ddc9-4986-ad7b-ca5e59c1fe0c	NCSC00088575		Plantae	Magnoliophyta		Ericales	Ericaceae	Vaccinium formosum	Andrews	Vaccinium	formosum					Weakley, A.S. 2012 (working draft of 30 Nov 2012). Flora of the southern and mid-Atlantic states. Courtesy of the author, University of North Carolina, Chapel Hill.					Howell	BATR-33	2014-06-09	2014	6	9	160			Occasional at this site; occasional in Carolina bay lakes	Littoral Zone
7289538	NCSC		024f44f2-a2f5-4daa-b306-c11efb5aa4d0	PreservedSpecimen	92848611-faac-451d-a0e8-2d39719bba3b	NCSC00088544		Plantae	Magnoliophyta		Asterales	Asteraceae	Hypochaeris radicata	L.	Hypochaeris	radicata					Weakley, A.S. 2012 (working draft of 30 Nov 2012). Flora of the southern and mid-Atlantic states. Courtesy of the author, University of North Carolina, Chapel Hill.					Howell	BATR-32	2014-06-09	2014	6	9	160			Rare at this site; rare in Carolina bay lakes	Littoral Zone
7289539	NCSC		024f44f2-a2f5-4daa-b306-c11efb5aa4d0	PreservedSpecimen	c1d0897c-4aec-45b0-b782-6f892f47072d	NCSC00088124		Plantae	Magnoliophyta		Poales	Xyridaceae	Xyris		Xyris						Weakley, A.S. 2012 (working draft of 30 Nov 2012). Flora of the southern and mid-Atlantic states. Courtesy of the author, University of North Carolina, Chapel Hill.					Howell	BATR-31	2014-06-09	2014	6	9	160			Occasional at this site; occasional in Carolina bay lakes	Littoral Zone
7289540	NCSC		024f44f2-a2f5-4daa-b306-c11efb5aa4d0	PreservedSpecimen	febaa87c-c323-416f-a815-61dfeb2af32f	NCSC00088129		Plantae	Magnoliophyta		Caryophyllales	Polygonaceae	Rumex hastatulus	Baldw.	Rumex	hastatulus					Weakley, A.S. 2012 (working draft of 30 Nov 2012). Flora of the southern and mid-Atlantic states. Courtesy of the author, University of North Carolina, Chapel Hill.					Howell	BATR-30	2014-06-09	2014	6	9	160			Infrequent at this site; rare in Carolina bay lakes	Littoral Zone
7289541	NCSC		024f44f2-a2f5-4daa-b306-c11efb5aa4d0	PreservedSpecimen	17a4fb32-428a-43a6-b7e8-17676906654b	NCSC00088539		Plantae	Magnoliophyta		Aquifoliales	Aquifoliaceae	Ilex glabra	(L.) A. Gray	Ilex	glabra					Weakley, A.S. 2012 (working draft of 30 Nov 2012). Flora of the southern and mid-Atlantic states. Courtesy of the author, University of North Carolina, Chapel Hill.					Howell	BATR-3	2014-05-10	2014	5	10	130			Rare at this site; infrequent in Carolina bay lakes	Littoral Zone
7289542	NCSC		024f44f2-a2f5-4daa-b306-c11efb5aa4d0	PreservedSpecimen	936aa2e2-94cc-4c1b-8cb8-d3bb17979657	NCSC00088126		Plantae	Magnoliophyta		Liliales	Smilacaceae	Smilax glauca	Walter	Smilax	glauca					Weakley, A.S. 2012 (working draft of 30 Nov 2012). Flora of the southern and mid-Atlantic states. Courtesy of the author, University of North Carolina, Chapel Hill.					Howell	BATR-29	2014-06-09	2014	6	9	160			Rare at this site; rare in Carolina bay lakes	Littoral Zone
7289543	NCSC		024f44f2-a2f5-4daa-b306-c11efb5aa4d0	PreservedSpecimen	ca8597ae-3dd9-4da4-80c0-cac5013e755b	NCSC00088139		Plantae	Magnoliophyta		Lamiales	Plantaginaceae	Nuttallanthus canadensis	(L.) D.A. Sutton	Nuttallanthus	canadensis					Weakley, A.S. 2012 (working draft of 30 Nov 2012). Flora of the southern and mid-Atlantic states. Courtesy of the author, University of North Carolina, Chapel Hill.					Howell	BATR-28	2014-06-09	2014	6	9	160			Rare at this site; rare in Carolina bay lakes	Littoral Zone
7289544	NCSC		024f44f2-a2f5-4daa-b306-c11efb5aa4d0	PreservedSpecimen	6de8f521-ec2a-4d8d-9e9b-89b61cd9fdce	NCSC00088558		Plantae	Magnoliophyta		Poales	Juncaceae	Juncus scirpoides	Lam.	Juncus	scirpoides					Weakley, A.S. 2012 (working draft of 30 Nov 2012). Flora of the southern and mid-Atlantic states. Courtesy of the author, University of North Carolina, Chapel Hill.					Howell	BATR-27	2014-06-09	2014	6	9	160			Infrequent at this site; infrequent in Carolina bay lakes	Littoral Zone
7289545	NCSC		024f44f2-a2f5-4daa-b306-c11efb5aa4d0	PreservedSpecimen	d8d16a73-f414-47bf-b8b1-6ec9418e0ffe	NCSC00088552		Plantae	Pteridophyta	Polypodiopsida	Polypodiales	Blechnaceae	Lorinseria aereolata	(L.) T. Moore							Weakley, A.S. 2012 (working draft of 30 Nov 2012). Flora of the southern and mid-Atlantic states. Courtesy of the author, University of North Carolina, Chapel Hill.					Howell	BATR-26	2014-06-09	2014	6	9	160			Occasional at this site; occasional in Carolina bay lakes	Littoral Zone
7289546	NCSC		024f44f2-a2f5-4daa-b306-c11efb5aa4d0	PreservedSpecimen	cda40b81-59ee-4ee4-9c4c-0ff5a42bc219	NCSC00088578		Plantae	Magnoliophyta		Gentianales	Gelsemiaceae	Gelsemium sempervirens	Ait.	Gelsemium	sempervirens					Weakley, A.S. 2012 (working draft of 30 Nov 2012). Flora of the southern and mid-Atlantic states. Courtesy of the author, University of North Carolina, Chapel Hill.					Howell	BATR-25	2014-06-09	2014	6	9	160			Occasional at this site; occasional in Carolina bay lakes	Littoral Zone
7289547	NCSC		024f44f2-a2f5-4daa-b306-c11efb5aa4d0	PreservedSpecimen	bd097af2-87b6-4664-ba19-d23fcac56f0e	NCSC00088551		Plantae	Pteridophyta	Polypodiopsida	Polypodiales	Blechnaceae	Anchistea virginica	C.Presl	Anchistea	virginica					Weakley, A.S. 2012 (working draft of 30 Nov 2012). Flora of the southern and mid-Atlantic states. Courtesy of the author, University of North Carolina, Chapel Hill.					Howell	BATR-24	2014-06-09	2014	6	9	160			Occasional at this site; occasional in Carolina bay lakes	Littoral Zone
7289548	NCSC		024f44f2-a2f5-4daa-b306-c11efb5aa4d0	PreservedSpecimen	42b6672b-d466-4b6e-ba35-e481e7b84fad	NCSC00088131		Plantae	Magnoliophyta		Caryophyllales	Polygonaceae	Rumex hastatulus	Baldw.	Rumex	hastatulus					Weakley, A.S. 2012 (working draft of 30 Nov 2012). Flora of the southern and mid-Atlantic states. Courtesy of the author, University of North Carolina, Chapel Hill.					Howell	BATR-23	2014-06-09	2014	6	9	160			Infrequent at this site; rare in Carolina bay lakes	Littoral Zone
7289549	NCSC		024f44f2-a2f5-4daa-b306-c11efb5aa4d0	PreservedSpecimen	18d132d9-b08e-4f6b-b1b6-03a6af8bf29d	NCSC00088128		Plantae	Magnoliophyta		Gentianales	Rubiaceae	Diodia virginiana	L.	Diodia	virginiana					Weakley, A.S. 2012 (working draft of 30 Nov 2012). Flora of the southern and mid-Atlantic states. Courtesy of the author, University of North Carolina, Chapel Hill.					Howell	BATR-22	2014-06-09	2014	6	9	160			Rare at this site; rare in Carolina bay lakes	Littoral Zone
7289550	NCSC		024f44f2-a2f5-4daa-b306-c11efb5aa4d0	PreservedSpecimen	1b159c73-59b9-4464-a368-8bbd43870b26	NCSC00088562		Plantae	Magnoliophyta		Caryophyllales	Caryophyllaceae	Stipulicida setacea	Michx.	Stipulicida	setacea					Weakley, A.S. 2012 (working draft of 30 Nov 2012). Flora of the southern and mid-Atlantic states. Courtesy of the author, University of North Carolina, Chapel Hill.					Howell	BATR-21	2014-06-09	2014	6	9	160			Rare at this site; rare in Carolina bay lakes	Littoral Zone
7289551	NCSC		024f44f2-a2f5-4daa-b306-c11efb5aa4d0	PreservedSpecimen	54c9fec7-8240-4ef8-887f-c9466e190c12	NCSC00088543		Plantae	Magnoliophyta		Asterales	Asteraceae	Krigia virginica	(L.) Willd.	Krigia	virginica					Weakley, A.S. 2012 (working draft of 30 Nov 2012). Flora of the southern and mid-Atlantic states. Courtesy of the author, University of North Carolina, Chapel Hill.					Howell	BATR-20	2014-06-09	2014	6	9	160			Rare at this site; rare in Carolina bay lakes	Littoral Zone
7289552	NCSC		024f44f2-a2f5-4daa-b306-c11efb5aa4d0	PreservedSpecimen	79c40399-5647-4db6-b71a-4a27530abe1f	NCSC00088564		Plantae	Coniferophyta		Pinales	Cupressaceae	Chamaecyparis thyoides	(L.) Britton, Sterns & Poggenb.	Chamaecyparis	thyoides					Weakley, A.S. 2012 (working draft of 30 Nov 2012). Flora of the southern and mid-Atlantic states. Courtesy of the author, University of North Carolina, Chapel Hill.					Howell	BATR-2	2014-05-10	2014	5	10	130			Infrequent at this site; occasional in Carolina bay lakes	Littoral Zone
7289553	NCSC		024f44f2-a2f5-4daa-b306-c11efb5aa4d0	PreservedSpecimen	a413c0ea-abef-4516-ad59-5ca0307a0e1a	NCSC00088548		Plantae	Magnoliophyta		Fagales	Betulaceae	Betula nigra	L.	Betula	nigra					Weakley, A.S. 2012 (working draft of 30 Nov 2012). Flora of the southern and mid-Atlantic states. Courtesy of the author, University of North Carolina, Chapel Hill.					Howell	BATR-19	2014-06-09	2014	6	9	160			Occasional at this site; infrequent in Carolina bay lakes	Littoral Zone
7289554	NCSC		024f44f2-a2f5-4daa-b306-c11efb5aa4d0	PreservedSpecimen	22ca4ce8-725c-40e9-a9b8-b522947dde8f	NCSC00088136		Plantae	Magnoliophyta		Poales	Poaceae	Panicum hemitomon	Schult.	Panicum	hemitomon					Weakley, A.S. 2012 (working draft of 30 Nov 2012). Flora of the southern and mid-Atlantic states. Courtesy of the author, University of North Carolina, Chapel Hill.					Howell	BATR-18	2014-06-09	2014	6	9	160			Abundant at this site; frequent - abundant in Carolina bay lakes	Littoral Zone
7289555	NCSC		024f44f2-a2f5-4daa-b306-c11efb5aa4d0	PreservedSpecimen	349ce520-2b5a-4787-b6a6-27d52ea26158	NCSC00088574		Plantae	Magnoliophyta		Ericales	Ericaceae	Lyonia lucida	(Lam.) K. Koch	Lyonia	lucida					Weakley, A.S. 2012 (working draft of 30 Nov 2012). Flora of the southern and mid-Atlantic states. Courtesy of the author, University of North Carolina, Chapel Hill.					Howell	BATR-17	2014-05-10	2014	5	10	130			Occasional at this site; frequent in Carolina bay lakes	Littoral Zone
7289556	NCSC		024f44f2-a2f5-4daa-b306-c11efb5aa4d0	PreservedSpecimen	6ea10cee-4880-43c9-94e5-7bc330181364	NCSC00088540		Plantae	Magnoliophyta		Aquifoliales	Aquifoliaceae	Ilex coriaceae	(Pursh) Chapm.							Weakley, A.S. 2012 (working draft of 30 Nov 2012). Flora of the southern and mid-Atlantic states. Courtesy of the author, University of North Carolina, Chapel Hill.					Howell	BATR-16	2014-05-10	2014	5	10	130			Occasional at this site; occasional in Carolina bay lakes	Littoral Zone
7289557	NCSC		024f44f2-a2f5-4daa-b306-c11efb5aa4d0	PreservedSpecimen	7d64dd25-2c42-4f94-b5b9-0003c5722c2c	NCSC00088557		Plantae	Magnoliophyta		Poales	Juncaceae	Juncus acuminatus	Michx.	Juncus	acuminatus					Weakley, A.S. 2012 (working draft of 30 Nov 2012). Flora of the southern and mid-Atlantic states. Courtesy of the author, University of North Carolina, Chapel Hill.					Howell	BATR-15	2014-05-10	2014	5	10	130			Rare at this site; rare in Carolina bay lakes	Littoral Zone
7289558	NCSC		024f44f2-a2f5-4daa-b306-c11efb5aa4d0	PreservedSpecimen	2698c2c0-4130-491a-94c6-3770c93ab649	NCSC00088130		Plantae	Magnoliophyta		Caryophyllales	Polygonaceae	Rumex hastatulus	Baldw.	Rumex	hastatulus					Weakley, A.S. 2012 (working draft of 30 Nov 2012). Flora of the southern and mid-Atlantic states. Courtesy of the author, University of North Carolina, Chapel Hill.					Howell	BATR-14	2014-05-10	2014	5	10	130			Infrequent at this site; rare in Carolina bay lakes	Littoral Zone
7289559	NCSC		024f44f2-a2f5-4daa-b306-c11efb5aa4d0	PreservedSpecimen	c047e520-4f40-424b-9e0c-a056297fede5	NCSC00088547		Plantae	Magnoliophyta		Fagales	Betulaceae	Betula nigra	L.	Betula	nigra					Weakley, A.S. 2012 (working draft of 30 Nov 2012). Flora of the southern and mid-Atlantic states. Courtesy of the author, University of North Carolina, Chapel Hill.					Howell	BATR-13	2014-05-10	2014	5	10	130			Occasional at this site; infrequent in Carolina bay lakes	Littoral Zone
7289560	NCSC		024f44f2-a2f5-4daa-b306-c11efb5aa4d0	PreservedSpecimen	e4125270-0eee-4529-a66b-21e283be4465	NCSC00088563		Plantae	Magnoliophyta		Ericales	Clethraceae	Clethra alnifolia	L.	Clethra	alnifolia					Weakley, A.S. 2012 (working draft of 30 Nov 2012). Flora of the southern and mid-Atlantic states. Courtesy of the author, University of North Carolina, Chapel Hill.					Howell	BATR-12	2014-05-10	2014	5	10	130			Occasional at this site; occasional in Carolina bay lakes	Littoral Zone
7289561	NCSC		024f44f2-a2f5-4daa-b306-c11efb5aa4d0	PreservedSpecimen	1d665958-79cf-4828-85ef-e3b7dd004f5a	NCSC00088141		Plantae	Magnoliophyta		Fagales	Myricaceae	Morella cerifera	Small	Morella	cerifera					Weakley, A.S. 2012 (working draft of 30 Nov 2012). Flora of the southern and mid-Atlantic states. Courtesy of the author, University of North Carolina, Chapel Hill.					Howell	BATR-11	2014-05-10	2014	5	10	130			Infrequent at this site; occasional in Carolina bay lakes	Littoral Zone
7289562	NCSC		024f44f2-a2f5-4daa-b306-c11efb5aa4d0	PreservedSpecimen	8c8e9a91-8135-4c07-8204-8b22308360aa	NCSC00088577		Plantae	Magnoliophyta		Gentianales	Gelsemiaceae	Gelsemium sempervirens	Ait.	Gelsemium	sempervirens					Weakley, A.S. 2012 (working draft of 30 Nov 2012). Flora of the southern and mid-Atlantic states. Courtesy of the author, University of North Carolina, Chapel Hill.					Howell	BATR-10	2014-05-10	2014	5	10	130			Occasional at this site; occasional in Carolina bay lakes	Littoral Zone
7289563	NCSC		024f44f2-a2f5-4daa-b306-c11efb5aa4d0	PreservedSpecimen	c59b56ea-6d5b-41d0-a210-3c0716e4c5e2	NCSC00088127		Plantae	Magnoliophyta		Sapindales	Sapindaceae	Acer rubrum	Wats.	Acer	rubrum					Weakley, A.S. 2012 (working draft of 30 Nov 2012). Flora of the southern and mid-Atlantic states. Courtesy of the author, University of North Carolina, Chapel Hill.					Howell	BATR-1	2014-05-10	2014	5	10	130			Occasional at this site; occasional in Carolina bay lakes	Littoral Zone
7289564	NCSC		024f44f2-a2f5-4daa-b306-c11efb5aa4d0	PreservedSpecimen	fc0c6664-4de2-49bb-918e-3a0ebffe363a	NCSC00088521		Plantae	Magnoliophyta		Aquifoliales	Aquifoliaceae	Ilex glabra	(L.) A. Gray	Ilex	glabra					Weakley, A.S. 2012 (working draft of 30 Nov 2012). Flora of the southern and mid-Atlantic states. Courtesy of the author, University of North Carolina, Chapel Hill.					Howell	BALA-9	2014-05-23	2014	5	23	143			Infrequent at this site; occasional in Carolina bay lakes	Natural Lake Shoreline Swamp (Cypress Subtype) (Schafale 2012)
7289565	NCSC		024f44f2-a2f5-4daa-b306-c11efb5aa4d0	PreservedSpecimen	264ac521-b678-49ac-991b-534d4892470c	NCSC00088528		Plantae	Magnoliophyta		Ericales	Ericaceae	Lyonia lucida	(Lam.) K. Koch	Lyonia	lucida					Weakley, A.S. 2012 (working draft of 30 Nov 2012). Flora of the southern and mid-Atlantic states. Courtesy of the author, University of North Carolina, Chapel Hill.					Howell	BALA-8	2014-05-23	2014	5	23	143			Occasional at this site; abundant in Carolina bay lakes	Natural Lake Shoreline Swamp (Cypress Subtype) (Schafale 2012)
7289566	NCSC		024f44f2-a2f5-4daa-b306-c11efb5aa4d0	PreservedSpecimen	bdc10874-38b0-4d0e-966e-8df103d98725	NCSC00088527		Plantae	Magnoliophyta		Ericales	Ericaceae	Vaccinium fuscatum	Aiton	Vaccinium	fuscatum					Weakley, A.S. 2012 (working draft of 30 Nov 2012). Flora of the southern and mid-Atlantic states. Courtesy of the author, University of North Carolina, Chapel Hill.					Howell	BALA-7	2014-05-23	2014	5	23	143			Occasional at this site; occasional in Carolina bay lakes	Natural Lake Shoreline Swamp (Cypress Subtype) (Schafale 2012)
7289567	NCSC		024f44f2-a2f5-4daa-b306-c11efb5aa4d0	PreservedSpecimen	35a87248-573e-4b78-a605-f442d1fc7dd2	NCSC00088530		Plantae	Magnoliophyta		Saxifragales	Iteaceae	Itea virginica	L.	Itea	virginica					Weakley, A.S. 2012 (working draft of 30 Nov 2012). Flora of the southern and mid-Atlantic states. Courtesy of the author, University of North Carolina, Chapel Hill.					Howell	BALA-6	2014-05-23	2014	5	23	143			Occasional at this site; occasional in Carolina bay lakes	Natural Lake Shoreline Swamp (Cypress Subtype) (Schafale 2012)
7289568	NCSC		024f44f2-a2f5-4daa-b306-c11efb5aa4d0	PreservedSpecimen	72e67736-6e16-4749-a0a8-5ee8671e1408	NCSC00088526		Plantae	Magnoliophyta		Ericales	Ericaceae	Zenobia pulverulenta	(Bartram ex Willd.) Pollard	Zenobia	pulverulenta					Weakley, A.S. 2012 (working draft of 30 Nov 2012). Flora of the southern and mid-Atlantic states. Courtesy of the author, University of North Carolina, Chapel Hill.					Howell	BALA-5	2014-05-23	2014	5	23	143			Occasional at this site; occasional in Carolina bay lakes	Natural Lake Shoreline Swamp (Cypress Subtype) (Schafale 2012)
7289569	NCSC		024f44f2-a2f5-4daa-b306-c11efb5aa4d0	PreservedSpecimen	7e7dc541-5ca7-46a5-b932-192cc5ef9852	NCSC00088534		Plantae	Magnoliophyta		Sapindales	Sapindaceae	Acer rubrum	Wats.	Acer	rubrum					Weakley, A.S. 2012 (working draft of 30 Nov 2012). Flora of the southern and mid-Atlantic states. Courtesy of the author, University of North Carolina, Chapel Hill.					Howell	BALA-4	2014-05-23	2014	5	23	143			Occasional at this site; occasional in Carolina bay lakes	Natural Lake Shoreline Swamp (Cypress Subtype) (Schafale 2012)
7289570	NCSC		024f44f2-a2f5-4daa-b306-c11efb5aa4d0	PreservedSpecimen	0b23d7af-d64a-414b-a223-9371357b6ee3	NCSC00088532		Plantae	Magnoliophyta		Magnoliales	Magnoliaceae	Magnolia virginiana	L.	Magnolia	virginiana					Weakley, A.S. 2012 (working draft of 30 Nov 2012). Flora of the southern and mid-Atlantic states. Courtesy of the author, University of North Carolina, Chapel Hill.					Howell	BALA-3	2014-05-23	2014	5	23	143			Occasional at this site; occasional in Carolina bay lakes	Natural Lake Shoreline Swamp (Cypress Subtype) (Schafale 2012)
7289571	NCSC		024f44f2-a2f5-4daa-b306-c11efb5aa4d0	PreservedSpecimen	a81c6ff1-9066-47f0-a758-7d6774ddc454	NCSC00088524		Plantae	Magnoliophyta		Poales	Cyperaceae	Rhynchospora distans	(Michx.) Vahl	Rhynchospora	distans					Weakley, A.S. 2012 (working draft of 30 Nov 2012). Flora of the southern and mid-Atlantic states. Courtesy of the author, University of North Carolina, Chapel Hill.					Howell	BALA-2	2013-11-30	2013	11	30	334			Rare at this site; rare in Carolina bay lakes	Natural Lake Shoreline Swamp (Cypress Subtype) (Schafale 2012)
7289572	NCSC		024f44f2-a2f5-4daa-b306-c11efb5aa4d0	PreservedSpecimen	39025c9b-aae1-4e99-afa7-e37f0ef69f36	NCSC00088529		Plantae	Magnoliophyta		Ericales	Ericaceae	Lyonia ligustrina	(L.) DC.	Lyonia	ligustrina					Weakley, A.S. 2012 (working draft of 30 Nov 2012). Flora of the southern and mid-Atlantic states. Courtesy of the author, University of North Carolina, Chapel Hill.					Howell	BALA-17	2014-07-17	2014	7	17	198			Rare at this site; infrequent in Carolina bay lakes	Natural Lake Shoreline Swamp (Cypress Subtype) (Schafale 2012)
7289573	NCSC		024f44f2-a2f5-4daa-b306-c11efb5aa4d0	PreservedSpecimen	e9389163-7fa4-425d-b4ba-226ee6cdabfe	NCSC00088536		Plantae	Magnoliophyta		Ericales	Theaceae	Gordonia lasianthus	L.	Gordonia	lasianthus					Weakley, A.S. 2012 (working draft of 30 Nov 2012). Flora of the southern and mid-Atlantic states. Courtesy of the author, University of North Carolina, Chapel Hill.					Howell	BALA-16	2014-07-17	2014	7	17	198			Infrequent at this site; occasional in Carolina bay lakes	Natural Lake Shoreline Swamp (Cypress Subtype) (Schafale 2012)
7289574	NCSC		024f44f2-a2f5-4daa-b306-c11efb5aa4d0	PreservedSpecimen	dff2385c-01e4-4c72-ba8a-f7c445c67477	NCSC00088523		Plantae	Coniferophyta		Pinales	Cupressaceae	Taxodium ascendens	Brongn.	Taxodium	ascendens					Weakley, A.S. 2012 (working draft of 30 Nov 2012). Flora of the southern and mid-Atlantic states. Courtesy of the author, University of North Carolina, Chapel Hill.					Howell	BALA-15	2014-05-23	2014	5	23	143			Abundant at this site; abundant in Carolina bay lakes	Natural Lake Shoreline Swamp (Cypress Subtype) (Schafale 2012)
7289575	NCSC		024f44f2-a2f5-4daa-b306-c11efb5aa4d0	PreservedSpecimen	23fdf9ef-c9cb-4b10-88e6-d0974c7c4d3a	NCSC00088522		Plantae	Pteridophyta	Polypodiopsida	Polypodiales	Blechnaceae	Anchistea virginica	C.Presl	Anchistea	virginica					Weakley, A.S. 2012 (working draft of 30 Nov 2012). Flora of the southern and mid-Atlantic states. Courtesy of the author, University of North Carolina, Chapel Hill.					Howell	BALA-14	2014-05-23	2014	5	23	143			Infrequent at this site; occasional in Carolina bay lakes	Natural Lake Shoreline Swamp (Cypress Subtype) (Schafale 2012)
7289576	NCSC		024f44f2-a2f5-4daa-b306-c11efb5aa4d0	PreservedSpecimen	5cca5031-122c-44b2-a982-3658427b80fa	NCSC00088535		Plantae	Magnoliophyta		Liliales	Smilacaceae	Smilax laurifolia	L.	Smilax	laurifolia					Weakley, A.S. 2012 (working draft of 30 Nov 2012). Flora of the southern and mid-Atlantic states. Courtesy of the author, University of North Carolina, Chapel Hill.					Howell	BALA-13	2014-05-23	2014	5	23	143			Frequent at this site; frequent in Carolina bay lakes	Natural Lake Shoreline Swamp (Cypress Subtype) (Schafale 2012)
7289577	NCSC		024f44f2-a2f5-4daa-b306-c11efb5aa4d0	PreservedSpecimen	a5caeb49-c09b-4805-8524-d855882778bd	NCSC00088531		Plantae	Magnoliophyta		Laurales	Lauraceae	Persea palustris	(Raf.) Sarg.	Persea	palustris					Weakley, A.S. 2012 (working draft of 30 Nov 2012). Flora of the southern and mid-Atlantic states. Courtesy of the author, University of North Carolina, Chapel Hill.					Howell	BALA-12	2014-05-23	2014	5	23	143			Occasional at this site; occasional in Carolina bay lakes	Natural Lake Shoreline Swamp (Cypress Subtype) (Schafale 2012)
7289578	NCSC		024f44f2-a2f5-4daa-b306-c11efb5aa4d0	PreservedSpecimen	e2c1f0e9-b4a5-4117-8520-6ed6fbd7fc95	NCSC00088533		Plantae	Magnoliophyta		Cornales	Nyssaceae	Nyssa biflora	Walter	Nyssa	biflora					Weakley, A.S. 2012 (working draft of 30 Nov 2012). Flora of the southern and mid-Atlantic states. Courtesy of the author, University of North Carolina, Chapel Hill.					Howell	BALA-11	2014-05-23	2014	5	23	143			Frequent at this site; frequent in Carolina bay lakes	Natural Lake Shoreline Swamp (Cypress Subtype) (Schafale 2012)
7289579	NCSC		024f44f2-a2f5-4daa-b306-c11efb5aa4d0	PreservedSpecimen	806da47d-54b1-450c-8f9c-bf7e5bc32f9e	NCSC00088520		Plantae	Magnoliophyta		Sapindales	Anacardiaceae	Rhus copallinum	L.	Rhus	copallinum					Weakley, A.S. 2012 (working draft of 30 Nov 2012). Flora of the southern and mid-Atlantic states. Courtesy of the author, University of North Carolina, Chapel Hill.					Howell	BALA-10	2014-05-23	2014	5	23	143			Rare at this site; rare in Carolina bay lakes	Natural Lake Shoreline Swamp (Cypress Subtype) (Schafale 2012)
7289580	NCSC		024f44f2-a2f5-4daa-b306-c11efb5aa4d0	PreservedSpecimen	05707756-839e-4ed4-a661-b407c68ff980	NCSC00088525		Plantae	Magnoliophyta		Ericales	Ericaceae	Chamaedaphne calyculata	Moench	Chamaedaphne	calyculata					Weakley, A.S. 2012 (working draft of 30 Nov 2012). Flora of the southern and mid-Atlantic states. Courtesy of the author, University of North Carolina, Chapel Hill.					Howell	BALA-1	2013-11-30	2013	11	30	334			Occasional at this site; occasional in Carolina bay lakes	Natural Lake Shoreline Swamp (Cypress Subtype) (Schafale 2012)
[truncated: 31 more columns]
